# Supplementary material for: An Overview of Marine Non-Indigenous Species Found in Three Contrasting Biogeographic Metropolitan French Regions: Insights on Distribution, Origins and Pathways of Introduction
Source: MDPI journal article supplement (doi:10.3390/d15020161), 2023-01-23

**Figure S2. Origin (biogeographic realms) of the 318 species for which the first introduction report was made in a single French region.**

Bars indicated proportion of NIS across the three French biogeographic for each origin, with the number of NIS shown inside. For instance, among the 111 NIS native to the Temperate Northern Pacific, 42 were first reported in Bay of Biscay, 42 in the Western Mediterranean Sea and 27 in the Northern Seas. The other NIS were not included because their primary introduction was reported in several regions at the same time.

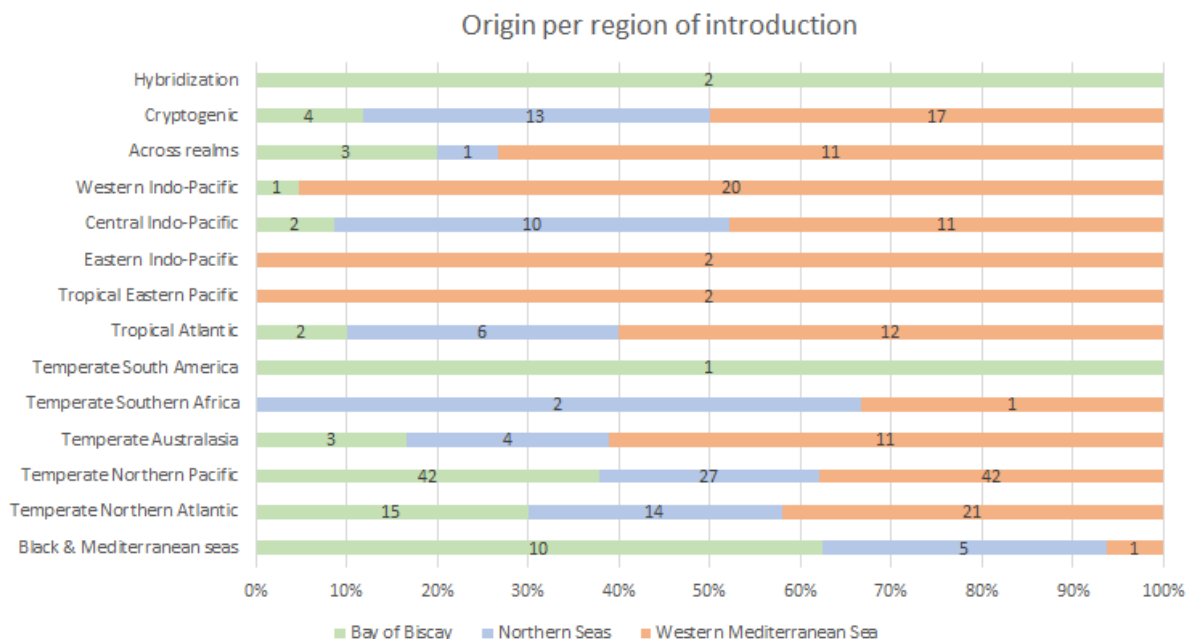

Supplement: s1 [file s1]
