# Supplementary material for: An Overview of Marine Non-Indigenous Species Found in Three Contrasting Biogeographic Metropolitan French Regions: Insights on Distribution, Origins and Pathways of Introduction
Source: MDPI journal article supplement (doi:10.3390/d15020161), 2023-01-23

Figure S1. Number of NIS classified by taxonomic phyla at a national scale and for the three French biogeographic regions (Mediterranean Sea, Bay of Biscay and Northern Seas)

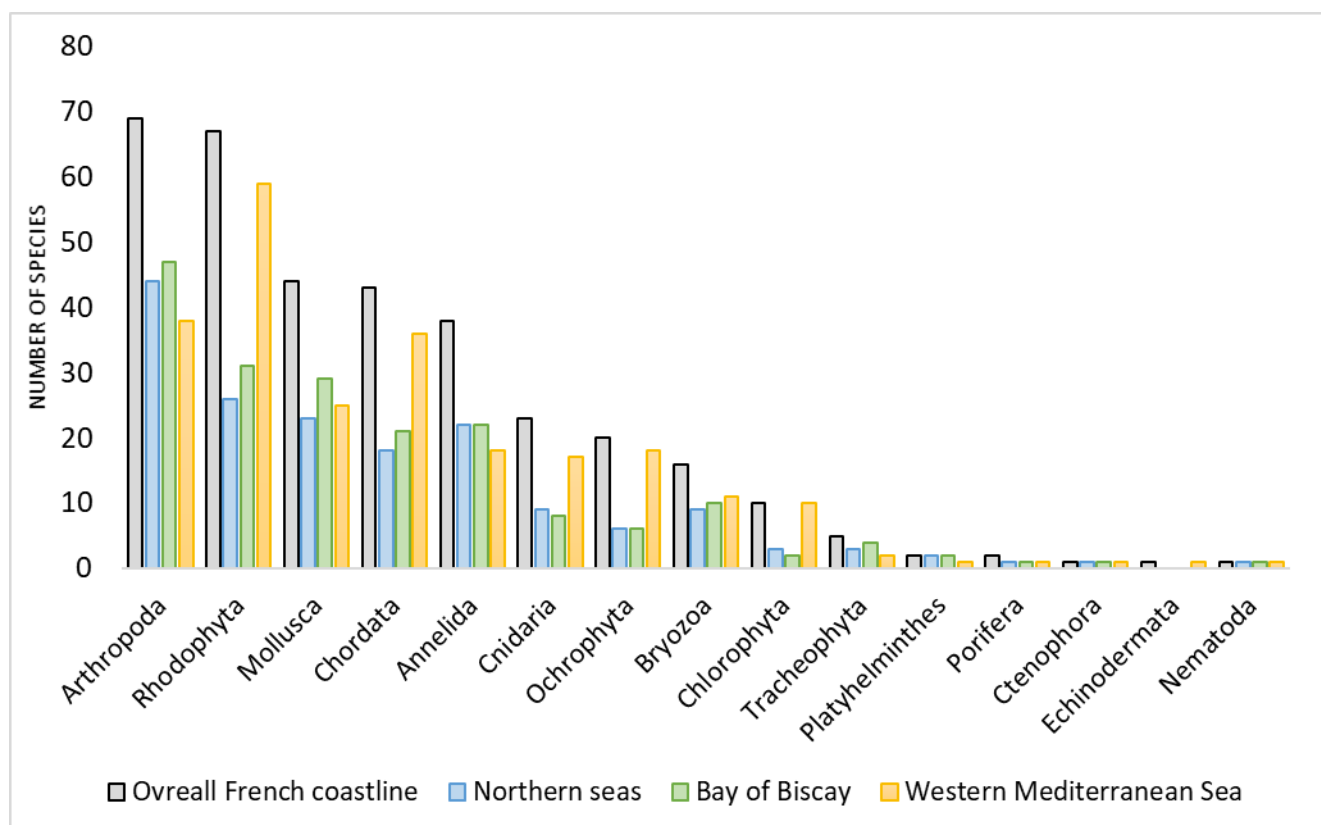

Supplement: s1 [file s1]
