# Supplementary material for: An Overview of Marine Non-Indigenous Species Found in Three Contrasting Biogeographic Metropolitan French Regions: Insights on Distribution, Origins and Pathways of Introduction
Source: MDPI journal article supplement (doi:10.3390/d15020161), 2023-01-23
Supplement: s1 [file s1]

Table S1: List of marine and estuarine non-indigenous species observed in the French metropolitan waters until Septembre 2022.

| Kingdom | Phylum      | Species with authority                                                                                                | Biogeographic realms of the native range | Date of first record | Location and region of first record              | Source                                     | Potential pathways                                                                                                                                                                                   | Status along the French English Channel | Status in the French Bay of Biscay   | Status in the French Mediterranean Sea |
|---------|-------------|-----------------------------------------------------------------------------------------------------------------------|------------------------------------------|----------------------|--------------------------------------------------|--------------------------------------------|------------------------------------------------------------------------------------------------------------------------------------------------------------------------------------------------------|-----------------------------------------|--------------------------------------|----------------------------------------|
| Plantae | Chlorophyta | <i>Caulerpa cylindracea</i> Sonder, 1845                                                                              | Temperate Australasia                    | 1997                 | Marseille - Western Mediterranean Sea            | Verlaque et al. 2000 [1]                   | TRANSPORT- STOWAWAY: Angling/fishing equipment<br>TRANSPORT- STOWAWAY: Hitchhikers on ship/boat (excluding ballast water and hull fouling)                                                           | Absent                                  | Absent                               | Established to invasive                |
| Plantae | Chlorophyta | <i>Caulerpa taxifolia</i> (M.Vahl) C.Agardh, 1817                                                                     | Across realms                            | 1984                 | Monaco - Western Mediterranean Sea               | Meinesz et al. 1993 [2]                    | ESCAPE FROM CONFINEMENT: Botanical garden/zoo/aquaria (excluding domestic aquaria)                                                                                                                   | Absent                                  | Absent                               | Invasive                               |
| Plantae | Chlorophyta | <i>Cladophora hutchinsioides</i> C.Hoek & Womersley, 1984                                                             | Temperate Australasia                    | Before 2007          | Thau lagoon - Western Mediterranean Sea          | Verlaque et al. 2007 [3]                   | TRANSPORT- HITCHHIKERS: Hitchhikers on animals (except parasites, species transported by host/vector)                                                                                                | Absent                                  | Absent                               | Casual                                 |
| Plantae | Chlorophyta | <i>Codium fragile</i> subsp. <i>fragile</i> (Suringar) Hariot, 1889<br>= <i>Codium fragile</i> (Suringar) Hariot 1889 | Central Indo-Pacific                     | 1943                 | Finistère - Bay of Biscay                        | Silva, 1955 [4]                            | TRANSPORT- HITCHHIKERS: Hitchhikers on animals (except parasites, species transported by host/vector)<br>TRANSPORT- STOWAWAY: Ship/boat hull fouling<br>TRANSPORT- STOWAWAY: Ship/boat ballast water | Established                             | Established                          | Established                            |
| Plantae | Chlorophyta | <i>Derbesia rhizophora</i> Yamada, 1961                                                                               | Temperate Northern Pacific               | 1984                 | Thau lagoon - Western Mediterranean Sea          | Gerbal et al. 1985 [5]; Ben Maiz, 1986 [6] | TRANSPORT- HITCHHIKERS: Hitchhikers on animals (except parasites, species transported by host/vector)                                                                                                | Absent                                  | Absent                               | Casual                                 |
| Plantae | Chlorophyta | <i>Ulva australis</i> Areschoug, 1854                                                                                 | Temperate Australasia                    | 1984                 | Western Mediterranean Sea                        | Gerbal et al. 1985 [5]                     | TRANSPORT- HITCHHIKERS: Hitchhikers on animals (except parasites, species transported by host/vector)                                                                                                | Established                             | Established                          | Established                            |
| Plantae | Chlorophyta | <i>Ulva lactuca</i> Linnaeus, 1753                                                                                    | Cryptogenic                              | 1998                 | Western Mediterranean Sea                        | Verlaque, 2001 [1]                         | TRANSPORT- HITCHHIKERS: Hitchhikers on animals (except parasites, species transported by host/vector)                                                                                                | Absent (misidentification)              | Absent (misidentification)           | Established                            |
| Plantae | Chlorophyta | <i>Ulva ohnoi</i> M.Hiraoka & S.Shimada, 2004                                                                         | Temperate Northern Pacific               | 2003                 | Western Mediterranean Sea                        | Mineur et al. 2007 [7]                     | TRANSPORT- STOWAWAY: Ship/boat ballast water<br>TRANSPORT- STOWAWAY: Ship/boat hull fouling                                                                                                          | Casual                                  | Absent                               | Casual                                 |
| Plantae | Chlorophyta | <i>Ulvaria obscura</i> (Kützinger) Gayral ex Bliding, 1969                                                            | Cryptogenic                              | 1985                 | Western Mediterranean Sea                        | Ben Maiz 1986 [6]                          | UNKNOWN                                                                                                                                                                                              | Established and considered as native    | Established and considered as native | Established                            |
| Plantae | Chlorophyta | <i>Uronema marinum</i> Womersley, 1984                                                                                | Western Indo-Pacific                     | 1989                 | Western Mediterranean Sea                        | Verlaque et al. 2015 [8]                   | TRANSPORT- HITCHHIKERS: Hitchhikers on animals (except parasites, species transported by host/vector)                                                                                                | Absent                                  | Absent                               | Casual                                 |
| Plantae | Rhodophyta  | <i>Acanthophora nayadiformis</i> (Delile) Papenfuss, 1968                                                             | Cryptogenic                              | Before 1977          | Corsica - Western Mediterranean Sea              | Boudouresque & Perret, 1977 [9]            | UNKNOWN                                                                                                                                                                                              | Absent                                  | Absent                               | Casual                                 |
| Plantae | Rhodophyta  | <i>Acrothamnion preissii</i> (Sonder) E.M. Wollaston, 1968                                                            | Central Indo-Pacific                     | 1981                 | Villefranche-sur-mer - Western Mediterranean Sea | Boillot et al. 1982 [10]                   | TRANSPORT- STOWAWAY: Ship/boat hull fouling                                                                                                                                                          | Absent                                  | Absent                               | Established                            |
| Plantae | Rhodophyta  | <i>Agardhiella subulata</i> (C.Agardh) Kraft & M.J.Wynne, 1979                                                        | Across realms                            | 1984                 | Thau lagoon - Western Mediterranean Sea          | Ben Maiz 1986 [6]                          | TRANSPORT- HITCHHIKERS: Hitchhikers on animals (except parasites, species transported by host/vector)                                                                                                | Absent                                  | Absent                               | One record                             |

|         |            |                                                                                                                                    |                             |             |                                             |                                                   |                                                                                                                                                      |             |                         |             |
|---------|------------|------------------------------------------------------------------------------------------------------------------------------------|-----------------------------|-------------|---------------------------------------------|---------------------------------------------------|------------------------------------------------------------------------------------------------------------------------------------------------------|-------------|-------------------------|-------------|
| Plantae | Rhodophyta | <i>Agarophyton vermiculophyllum</i> (Ohmi) Gurgel, J.N. Norris & Fredericq, 2018 = <i>Gracilariopsis vermiculophylla</i> Ohmi 1956 | Temperate Northern Pacific  | 1993        | Concarneau - Bay of Biscay                  | Cabioch 1993 in Mollet et al. 1998 [11]           | TRANSPORT- HITCHHIKERS: Hitchhikers on animals (except parasites, species transported by host/vector)                                                | Established | Established to invasive | Absent      |
| Plantae | Rhodophyta | <i>Aglaothamnion feldmanniae</i> Halos, 1965                                                                                       | Temperate Northern Atlantic | 1979        | Toulon - Western Mediterranean Sea          | Verlaque & Tine, 1981 [12]                        | TRANSPORT- STOWAWAY: Ship/boat hull fouling                                                                                                          | Native      | Native                  | One record  |
| Plantae | Rhodophyta | <i>Ahnfeltiopsis flabelliformis</i> (Harvey) Masuda, 1993                                                                          | Temperate Northern Pacific  | 1995        | Thau lagoon - Western Mediterranean Sea     | Verlaque, 2001 [13]                               | TRANSPORT- HITCHHIKERS: Hitchhikers on animals (except parasites, species transported by host/vector)                                                | Absent      | Absent                  | One record  |
| Plantae | Rhodophyta | <i>Anotrichium furcellatum</i> (J.Agardh) Baldock, 1976 = <i>Neomonospora furcellata</i> (J.Agardh) Feldmann-Mazoyer & Meslin      | Temperate Northern Pacific  | 1922        | Cherbourg - Northern Seas                   | Feldmann-Mazoyer & Meslin, 1939 [14]              | TRANSPORT- STOWAWAY: Ship/boat hull fouling<br>TRANSPORT- STOWAWAY: Ship/boat ballast water                                                          | Established | Established             | Established |
| Plantae | Rhodophyta | <i>Antithamnion amphigeneum</i> A.Millar, 1990                                                                                     | Tropical Eastern Pacific    | 1988        | Thau lagoon - Western Mediterranean Sea     | Klein & Verlaque, 2011 [15]                       | TRANSPORT- STOWAWAY: Ship/boat hull fouling                                                                                                          | Absent      | Absent                  | Casual      |
| Plantae | Rhodophyta | <i>Antithamnion densum</i> (Suhr) M.Howe, 1914                                                                                     | Temperate Australasia       | 2002        | Marseille - Western Mediterranean Sea       | Halos, 1964 [16]                                  | TRANSPORT- STOWAWAY: Ship/boat hull fouling                                                                                                          | Established | Established             | Absent      |
| Plantae | Rhodophyta | <i>Antithamnion hubbsii</i> (Dawson, 1962)                                                                                         | Temperate Southern Africa   | 1964        | Bay of Morlaix - Northern Seas              | Verlaque & Rioual 1989 [17]                       | TRANSPORT- STOWAWAY: Ship/boat hull fouling                                                                                                          | Established | Established             | Established |
| Plantae | Rhodophyta | <i>Antithamnion pectinatum</i> (Montagne) Brauner, 1994                                                                            | Temperate Northern Pacific  | 1983        | Thau lagoon - Western Mediterranean Sea     | Verlaque & Rioual 1989 [17]                       | TRANSPORT- STOWAWAY: Ship/boat hull fouling<br>TRANSPORT- HITCHHIKERS: Hitchhikers on animals (except parasites, species transported by host/vector) | Absent      | Casual                  | One record  |
| Plantae | Rhodophyta | <i>Antithamnionella boergesenii</i> (Cormaci & G.Furnari) Athanasiadis, 1996                                                       | Cryptogenic                 | Before 1995 | Banyuls-sur-mer - Western Mediterranean Sea | Athanasiadis, 1996 in Klein & Verlaque, 2011 [15] | UNKNOWN                                                                                                                                              | Absent      | Absent                  | Casual      |
| Plantae | Rhodophyta | <i>Antithamnionella elegans</i> (Berthold) J.H.Price & D.M.John, 1986                                                              | Cryptogenic                 | Before 1977 | Corsica - Western Mediterranean Sea         | Boudouresque & Perret, 1977 [9]                   | UNKNOWN                                                                                                                                              | Absent      | Absent                  | Established |
| Plantae | Rhodophyta | <i>Antithamnionella spirographidis</i> (Schiffner) E.M.Wollaston, 1968                                                             | Central Indo-Pacific        | 1927        | Cherbourg - Northern Seas                   | Feldman, 1937 [18]                                | TRANSPORT- STOWAWAY: Ship/boat hull fouling                                                                                                          | Established | Established             | Established |
| Plantae | Rhodophyta | <i>Antithamnionella ternifolia</i> (J.D.Hooker & Harvey) Lyle, 1922                                                                | Temperate Australasia       | 1910        | Cherbourg - Northern Seas                   | Hamel, 1924 [19]                                  | TRANSPORT- STOWAWAY: Ship/boat hull fouling                                                                                                          | Established | Established             | Established |
| Plantae | Rhodophyta | <i>Apoglossum gregarium</i> (E.Y.Dawson) M.J.Wynne, 1985 = <i>Phrix spatulata</i> (E.Y.Dawson) M.J.Wynne, M.Kamiya & J.A.West 2018 | Temperate Northern Pacific  | 1997        | Monaco - Western Mediterranean Sea          | Verlaque & Bernard, 1998 [20]                     | TRANSPORT- STOWAWAY: Ship/boat hull fouling<br>TRANSPORT- STOWAWAY: Ship/boat ballast water                                                          | Absent      | Absent                  | Established |
| Plantae | Rhodophyta | <i>Asparagopsis armata</i> Harvey, 1855                                                                                            | Temperate Australasia       | 1922        | Guéthary - Bay of Biscay                    | Sauvageau, 1925 [21]                              | TRANSPORT- STOWAWAY: Ship/boat ballast water                                                                                                         | Established | Established             | Established |
| Plantae | Rhodophyta | <i>Asparagopsis taxiformis</i> (Delile) Trevisan, 1845                                                                             | Central Indo-Pacific        | 1937        | Unknown                                     | Davy de Virville, 1938 [22]                       | UNKNOWN                                                                                                                                              | Casual      | Casual                  | Established |

|         |            |                                                                                                                            |                             |             |                                         |                              |                                                                                                                                                                                                      |             |             |             |
|---------|------------|----------------------------------------------------------------------------------------------------------------------------|-----------------------------|-------------|-----------------------------------------|------------------------------|------------------------------------------------------------------------------------------------------------------------------------------------------------------------------------------------------|-------------|-------------|-------------|
| Plantae | Rhodophyta | <i>Bonnemaisonia hamifera</i> Hariot, 1891                                                                                 | Temperate Northern Pacific  | 1876        | Chausey islands - Northern Seas         | Hamel, 1931 [23]             | TRANSPORT- STOWAWAY: Ship/boat hull fouling<br>TRANSPORT- HITCHHIKERS: Hitchhikers on animals (except parasites, species transported by host/vector)                                                 | Established | Established | Established |
| Plantae | Rhodophyta | <i>Botryocladia wrightii</i> (Harvey) W.E. Schmidt, D.L.Ballantine & Fredericq, 2017                                       | Temperate Northern Pacific  | 1978        | Thau lagoon - Western Mediterranean Sea | Ben-Maiz, 1986 [6]           | TRANSPORT- HITCHHIKERS: Hitchhikers on animals (except parasites, species transported by host/vector)                                                                                                | Casual      | Casual      | Casual      |
| Plantae | Rhodophyta | <i>Caulacanthus okamurae</i> Yamada, 1933 = <i>C. ustulatus</i> (Turner) Kützinger 1843                                    | Central Indo-Pacific        | 1986        | Carantec - Northern Seas                | Rio & Cabioch, 1988 [24]     | TRANSPORT- HITCHHIKERS: Hitchhikers on animals (except parasites, species transported by host/vector)                                                                                                | Established | Established | Established |
| Plantae | Rhodophyta | <i>Centroceras clavulatum</i> (C.Agardh) Montagne, 1846                                                                    | Cryptogenic                 | 1992        | Arcachon bay - Bay of Biscay            | Auby, 1993 [25]              | TRANSPORT- HITCHHIKERS: Hitchhikers on animals (except parasites, species transported by host/vector)                                                                                                | Established | Established | Established |
| Plantae | Rhodophyta | <i>Chondria coerulescens</i> (J.Agardh) Sauvageau, 1897                                                                    | Temperate Northern Atlantic | 1995        | Thau lagoon - Western Mediterranean Sea | Verlaque, 2001 [13]          | TRANSPORT- HITCHHIKERS: Hitchhikers on animals (except parasites, species transported by host/vector)                                                                                                | Native      | Native      | Established |
| Plantae | Rhodophyta | <i>Chondria curvilineata</i> Collins & Hervey, 1917                                                                        | Tropical Atlantic           | 1981        | Corsica - Western Mediterranean Sea     | Verlaque, 1987 [26]          | TRANSPORT- STOWAWAY: Ship/boat hull fouling                                                                                                                                                          | Absent      | Absent      | Established |
| Plantae | Rhodophyta | <i>Chondrus giganteus</i> f. <i>flabellatus</i> Mikami, 1965                                                               | Temperate Northern Pacific  | 1993        | Thau lagoon - Western Mediterranean Sea | Verlaque & Latala, 1996 [27] | TRANSPORT- HITCHHIKERS: Hitchhikers on animals (except parasites, species transported by host/vector)                                                                                                | Absent      | Absent      | Casual      |
| Plantae | Rhodophyta | <i>Colaconema codicola</i> (Børgesen) Stegenga, J.J.Bolton & R.J.Anderson, 1997                                            | Temperate Southern Africa   | Before 1952 | Unknown - Western Mediterranean Sea     | Bidoux & Magne, 1989 [28]    | TRANSPORT- HITCHHIKERS: Hitchhikers on animals (except parasites, species transported by host/vector)<br>TRANSPORT- STOWAWAY: Ship/boat hull fouling<br>TRANSPORT- STOWAWAY: Ship/boat ballast water | Absent      | Absent      | Established |
| Plantae | Rhodophyta | <i>Dasya sessilis</i> Yamada, 1928 = <i>Dasyisiphonia sessilis</i> (Yamada) M.M.Cassidy, C.W.Schneider & G.W.Saunders 2022 | Temperate Northern Pacific  | 1984        | Thau lagoon - Western Mediterranean Sea | Gerbal et al. 1985 [5]       | TRANSPORT- HITCHHIKERS: Hitchhikers on animals (except parasites, species transported by host/vector)<br>TRANSPORT- STOWAWAY: Ship/boat hull fouling<br>TRANSPORT- STOWAWAY: Ship/boat ballast water | Absent      | Casual      | Casual      |
| Plantae | Rhodophyta | <i>Dasyisiphonia japonica</i> (Yendo) H.-S.Kim, 2012                                                                       | Temperate Northern Pacific  | 1984        | Roscoff - Northern Seas                 | Sjötun et al. 2008 [29]      | TRANSPORT- HITCHHIKERS: Hitchhikers on animals (except parasites, species transported by host/vector)<br>TRANSPORT- STOWAWAY: Ship/boat hull fouling                                                 | Established | Established | Established |
| Plantae | Rhodophyta | <i>Goniotrichopsis sublitoralis</i> G.M.Smith, 1943                                                                        | Temperate Northern Pacific  | 1975        | Northern Seas                           | Magne, 1992 [30]             | TRANSPORT- STOWAWAY: Ship/boat hull fouling                                                                                                                                                          | Casual      | Absent      | Casual      |
| Plantae | Rhodophyta | <i>Gracilariopsis chorda</i> (Holmes) Ohmi, 1958                                                                           | Temperate Northern Pacific  | 2010        | Bay of Biscay                           | Mineur et al. 2012 [31]      | TRANSPORT- STOWAWAY: Ship/boat hull fouling<br>TRANSPORT- STOWAWAY: Ship/boat ballast water<br>TRANSPORT- HITCHHIKERS: Hitchhikers on animals (except parasites, species transported by host/vector) | Absent      | One record  | Absent      |
| Plantae | Rhodophyta | <i>Grateloupia asiatica</i> S.Kawaguchi & H.W.Wang, 2001                                                                   | Temperate Northern Pacific  | 1984        | Western Mediterranean Sea               | Verlaque et al. 2005 [32]    | TRANSPORT- HITCHHIKERS: Hitchhikers on animals (except parasites, species transported by host/vector)                                                                                                | Absent      | One record  | Casual      |
| Plantae | Rhodophyta | <i>Grateloupia minima</i> P. Crouan & H. Crouan, 1867                                                                      | Temperate Northern Atlantic | 1998        | Western Mediterranean Sea               | Cecere et al. 2011 [33]      | TRANSPORT- HITCHHIKERS: Hitchhikers on animals (except parasites, species transported by host/vector)                                                                                                | Native      | Native      | Established |

|         |            |                                                                  |                             |      |                           |                                 |                                                                                                                                                                                                      |             |             |             |
|---------|------------|------------------------------------------------------------------|-----------------------------|------|---------------------------|---------------------------------|------------------------------------------------------------------------------------------------------------------------------------------------------------------------------------------------------|-------------|-------------|-------------|
| Plantae | Rhodophyta | <i>Grateloupia patens</i> (Okamura) S.Kawaguchi & H.W.Wang, 2001 | Temperate Northern Pacific  | 1994 | Western Mediterranean Sea | Verlaque, 2001 [13]             | TRANSPORT- HITCHHIKERS: Hitchhikers on animals (except parasites, species transported by host/vector)                                                                                                | Absent      | Absent      | Casual      |
| Plantae | Rhodophyta | <i>Grateloupia subpectinata</i> Holmes, 1912                     | Central Indo-Pacific        | 1992 | Northern Seas             | Cabioch et al. 1997 [34]        | TRANSPORT- HITCHHIKERS: Hitchhikers on animals (except parasites, species transported by host/vector)                                                                                                | Casual      | Casual      | Casual      |
| Plantae | Rhodophyta | <i>Grateloupia turuturu</i> Y. Yamada, 1941                      | Central Indo-Pacific        | 1982 | Western Mediterranean Sea | Riouall et al. 1985 [35]        | TRANSPORT- STOWAWAY: Ship/boat hull fouling<br>TRANSPORT- HITCHHIKERS: Hitchhikers on animals (except parasites, species transported by host/vector)                                                 | Established | Established | Established |
| Plantae | Rhodophyta | <i>Griffithsia corallinoides</i> (Linnaeus) Trevisan, 1845       | Temperate Northern Atlantic | 1983 | Western Mediterranean Sea | Ben Maiz, 1986 [6]              | TRANSPORT- STOWAWAY: Ship/boat hull fouling<br>TRANSPORT- STOWAWAY: Ship/boat ballast water<br>TRANSPORT- HITCHHIKERS: Hitchhikers on animals (except parasites, species transported by host/vector) | Native      | Native      | Established |
| Plantae | Rhodophyta | <i>Herposiphonia parca</i> Setchell, 1926                        | Western Indo-Pacific        | 1997 | Western Mediterranean Sea | Verlaque, 2001 [13]             | TRANSPORT- HITCHHIKERS: Hitchhikers on animals (except parasites, species transported by host/vector)                                                                                                | Absent      | Casual      | Casual      |
| Plantae | Rhodophyta | <i>Hildenbrandia occidentalis</i> Setchell, 1917                 | Temperate Northern Pacific  | 2011 | Northern Seas             | Barbara & Diaz Tapia, 2012 [36] | UNKNOWN                                                                                                                                                                                              | Casual      | Absent      | Absent      |
| Plantae | Rhodophyta | <i>Hypnea spinella</i> (C.Agardh) Kützinger, 1847                | Central Indo-Pacific        | 2002 | Western Mediterranean Sea | Klein et al. 2005 [37]          | TRANSPORT- STOWAWAY: Ship/boat hull fouling                                                                                                                                                          | Absent      | Absent      | Established |
| Plantae | Rhodophyta | <i>Hypnea valentiae</i> (Turner) Montagne, 1841                  | Temperate Northern Pacific  | 1993 | Western Mediterranean Sea | Verlaque, 2001 [13]             | TRANSPORT- STOWAWAY: Ship/boat hull fouling<br>TRANSPORT- STOWAWAY: Ship/boat ballast water<br>TRANSPORT- HITCHHIKERS: Hitchhikers on animals (except parasites, species transported by host/vector) | Absent      | Casual      | Casual      |
| Plantae | Rhodophyta | <i>Laurencia brongniartii</i> J.Agardh, 1841                     | Temperate Northern Pacific  | 1989 | Northern Seas             | Cabioch et al. 1990 [38]        | TRANSPORT- STOWAWAY: Ship/boat hull fouling<br>TRANSPORT- STOWAWAY: Ship/boat ballast water<br>TRANSPORT- HITCHHIKERS: Hitchhikers on animals (except parasites, species transported by host/vector) | Extinct     | Absent      | Absent      |
| Plantae | Rhodophyta | <i>Laurencia caduciramulosa</i> Masuda & S. Kawaguchi, 1997      | Temperate Northern Pacific  | 2002 | Western Mediterranean Sea | Klein & Verlaque, 2005 [39]     | TRANSPORT- STOWAWAY: Ship/boat hull fouling<br>TRANSPORT- HITCHHIKERS: Hitchhikers on animals (except parasites, species transported by host/vector)                                                 | Absent      | Absent      | Casual      |
| Plantae | Rhodophyta | <i>Laurencia chondrioides</i> Børgesen, 1918                     | Cryptogenic                 | 2005 | Western Mediterranean Sea | Klein & Verlaque, 2011 [15]     | UNKNOWN                                                                                                                                                                                              | Absent      | Absent      | Casual      |
| Plantae | Rhodophyta | <i>Laurencia okamurai</i> Yamada, 1931                           | Temperate Northern Pacific  | 1984 | Western Mediterranean Sea | Ben-Maiz, 1986 [6]              | TRANSPORT- HITCHHIKERS: Hitchhikers on animals (except parasites, species transported by host/vector)                                                                                                | Absent      | Absent      | Casual      |
| Plantae | Rhodophyta | <i>Lithophyllum yessoense</i> Foslie, 1909                       | Temperate Northern Pacific  | 1994 | Western Mediterranean Sea | Verlaque, 2001 [13]             | TRANSPORT- HITCHHIKERS: Hitchhikers on animals (except parasites, species transported by host/vector)                                                                                                | Absent      | Absent      | Casual      |
| Plantae | Rhodophyta | <i>Lomentaria flaccida</i> Tak.Tanaka, 1944                      | Temperate Northern Pacific  | 2002 | Western Mediterranean Sea | Verlaque et al. 2007 [3]        | TRANSPORT- HITCHHIKERS: Hitchhikers on animals (except parasites, species transported by host/vector)                                                                                                | Absent      | Absent      | Established |

|         |            |                                                                                                                                |                             |             |                           |                                            |                                                                                                                                                      |             |             |             |
|---------|------------|--------------------------------------------------------------------------------------------------------------------------------|-----------------------------|-------------|---------------------------|--------------------------------------------|------------------------------------------------------------------------------------------------------------------------------------------------------|-------------|-------------|-------------|
| Plantae | Rhodophyta | <i>Lomentaria hakodatensis</i> Yendo, 1920<br>= <i>Yendoa hakodatensis</i> (Yendo) C.C.Santos, Lyra & J.M.C.Nunes 2022         | Temperate Northern Pacific  | 1979        | Western Mediterranean Sea | Ben Maiz 1986 [6]                          | TRANSPORT- STOWAWAY: Ship/boat hull fouling<br>TRANSPORT- HITCHHIKERS: Hitchhikers on animals (except parasites, species transported by host/vector) | Established | Established | Established |
| Plantae | Rhodophyta | <i>Lophocladia lallemandii</i> (Montagne) F.Schmitz, 1893                                                                      | Central Indo-Pacific        | 2011        | western Mediterranean Sea | CARTHAM Progam                             | TRANSPORT- STOWAWAY: Ship/boat hull fouling<br>TRANSPORT- STOWAWAY: Ship/boat ballast water<br>CORRIDOR: Interconnected waterways/basins/ seas       | Absent      | Absent      | Established |
| Plantae | Rhodophyta | <i>Melanothamnus flavimarinus</i> (M.-S.Kim & I.K.Lee) Díaz-Tapia & Maggs, 2017                                                | Temperate Northern Pacific  | 2010        | Northern Seas             | Geoffroy, 2012 [40]                        | UNKNOWN                                                                                                                                              | Casual      | Absent      | Absent      |
| Plantae | Rhodophyta | <i>Melanothamnus harveyi</i> (Bailey) Díaz-Tapia & Maggs, 2017                                                                 | Temperate Northern Pacific  | 1864        | Northern Seas             | Baffreau et al. 2018 [41]                  | TRANSPORT- STOWAWAY: Ship/boat hull fouling<br>TRANSPORT- HITCHHIKERS: Hitchhikers on animals (except parasites, species transported by host/vector) | One record  | Established | Established |
| Plantae | Rhodophyta | <i>Nemalion vermiculare</i> Suringar, 1874                                                                                     | Temperate Northern Pacific  | 2005        | Western Mediterranean Sea | Verlaque et al. 2007 [3]                   | TRANSPORT- HITCHHIKERS: Hitchhikers on animals (except parasites, species transported by host/vector)<br>TRANSPORT- STOWAWAY: Ship/boat hull fouling | Absent      | Absent      | Casual      |
| Plantae | Rhodophyta | <i>Nitophyllum stellatocorticatum</i> Okamura, 1932                                                                            | Temperate Northern Pacific  | Before 1988 | Western Mediterranean Sea | Verlaque et al. 2015 [8]                   | TRANSPORT- HITCHHIKERS: Hitchhikers on animals (except parasites, species transported by host/vector)                                                | Absent      | Absent      | Casual      |
| Plantae | Rhodophyta | <i>Pachymeniopsis lanceolata</i> (K.Okamura) Y.Yamada ex S.Kawabata, 1954                                                      | Temperate Northern Pacific  | 1982        | Western Mediterranean Sea | Riouall et al. 1985 [35]                   | TRANSPORT- HITCHHIKERS: Hitchhikers on animals (except parasites, species transported by host/vector)<br>TRANSPORT- STOWAWAY: Ship/boat hull fouling | Absent      | Established | Established |
| Plantae | Rhodophyta | <i>Polyopes lancifolius</i> (Harvey) Kawaguchi & Wang, 2002                                                                    | Temperate Northern Pacific  | 2008        | Bay of Biscay             | Mineur et al. 2010 [42]                    | TRANSPORT- HITCHHIKERS: Hitchhikers on animals (except parasites, species transported by host/vector)                                                | Absent      | Established | Absent      |
| Plantae | Rhodophyta | <i>Polysiphonia atlantica</i> Kapraun & J.N.Norris, 1982                                                                       | Temperate Northern Atlantic | 1985        | Western Mediterranean Sea | Ben Maiz et al. 1986 in Verlaque 2001 [13] | UNKNOWN                                                                                                                                              | Native      | Native      | Established |
| Plantae | Rhodophyta | <i>Polysiphonia forfex</i> Harvey, 1859<br>= <i>Melanothamnus forfex</i> (Harvey) Díaz-Tapia & Maggs 2017                      | Temperate Australasia       | 1999        | Bay of Biscay             | McIvor et al. 2001 [43]                    | TRANSPORT- HITCHHIKERS: Hitchhikers on animals (except parasites, species transported by host/vector)<br>TRANSPORT- STOWAWAY: Ship/boat hull fouling | Absent      | Casual      | Absent      |
| Plantae | Rhodophyta | <i>Polysiphonia morrowii</i> Harvey, 1857                                                                                      | Temperate Northern Pacific  | 1997        | Western Mediterranean Sea | Verlaque, 2001 [13]                        | TRANSPORT- STOWAWAY: Ship/boat hull fouling<br>TRANSPORT- HITCHHIKERS: Hitchhikers on animals (except parasites, species transported by host/vector) | Established | Established | Established |
| Plantae | Rhodophyta | <i>Polysiphonia paniculata</i> Montagne, 1842<br>= <i>Eutrichosiphonia paniculata</i> (Montagne) D.E.Bustamante & T.O.Cho 2021 | Temperate Northern Pacific  | 1967        | Western Mediterranean Sea | Lauret, 1970 [44]                          | TRANSPORT- STOWAWAY: Ship/boat ballast water<br>TRANSPORT- STOWAWAY: Ship/boat hull fouling                                                          | Absent      | Absent      | Casual      |
| Plantae | Rhodophyta | <i>Pyropia yezoensis</i> (Ueda) M.S.Hwang & H.G.Choi, 2011                                                                     | Temperate Northern Pacific  | 1975        | Western Mediterranean Sea | ICES, 1982 [45]                            | TRANSPORT- HITCHHIKERS: Hitchhikers on animals (except parasites, species transported by host/vector)                                                | Absent      | Absent      | One record  |

|         |              |                                                                                                                                                                |                             |      |                           |                                                                                                                                                      |                                                                                                       |                         |                         |                         |
|---------|--------------|----------------------------------------------------------------------------------------------------------------------------------------------------------------|-----------------------------|------|---------------------------|------------------------------------------------------------------------------------------------------------------------------------------------------|-------------------------------------------------------------------------------------------------------|-------------------------|-------------------------|-------------------------|
|         |              | = <i>Neopyropia yezoensis</i> (Ueda) L.-E. Yang & J. Brodie 2020                                                                                               |                             |      |                           |                                                                                                                                                      |                                                                                                       |                         |                         |                         |
| Plantae | Rhodophyta   | <i>Rhodophysemma georgei</i> Batters, 1900                                                                                                                     | Temperate Northern Atlantic | 1978 | Western Mediterranean Sea | Verlaque, 1981 [46]                                                                                                                                  | TRANSPORT- HITCHHIKERS: Hitchhikers on animals (except parasites, species transported by host/vector) | Native                  | Native                  | Casual                  |
| Plantae | Rhodophyta   | <i>Sarconema filiforme</i> (Sonder) Kylin, 1932                                                                                                                | Across realms               | 1990 | Western Mediterranean Sea | Knoepffler et al. 1990 [47]                                                                                                                          | TRANSPORT- HITCHHIKERS: Hitchhikers on animals (except parasites, species transported by host/vector) | Absent                  | Absent                  | One record              |
| Plantae | Rhodophyta   | <i>Solieria filiformis</i> (Kützinger) P.W. Gabrielson, 1985                                                                                                   | Tropical Atlantic           | 1999 | Western Mediterranean Sea | Verlaque et al. 2007 [3]                                                                                                                             | TRANSPORT- HITCHHIKERS: Hitchhikers on animals (except parasites, species transported by host/vector) | Absent                  | Absent                  | Casual                  |
| Plantae | Rhodophyta   | <i>Spongoconium caribaeum</i> (Børgesen) M.J. Wynne, 2005                                                                                                      | Temperate Northern Pacific  | 1981 | Western Mediterranean Sea | Ardre et al. 1982 [48]                                                                                                                               | TRANSPORT- STOWAWAY: Ship/boat ballast water<br>TRANSPORT- STOWAWAY: Ship/boat hull fouling           | Casual                  | Casual                  | Casual                  |
| Plantae | Rhodophyta   | <i>Symphyocladia dendroidea</i> (Montagne) D. Bustamante, B.Y. Won, S.C. Lindstrom & T.O. Cho, 2019                                                            | Temperate Northern Pacific  | 1998 | Western Mediterranean Sea | Verlaque 2001 ; Verlaque et al. 2008 [13,49]                                                                                                         | TRANSPORT- HITCHHIKERS: Hitchhikers on animals (except parasites, species transported by host/vector) | Established             | Established             | Established             |
| Plantae | Rhodophyta   | <i>Vertebrata fucoides</i> (Hudson) Kuntze, 1891                                                                                                               | Cryptogenic                 | 1875 | Bay of Biscay             | Ripart & Des Méloizes (INPN: <a href="https://inpn.mnhn.fr/espece/cd_nom/853398/tab/carte">https://inpn.mnhn.fr/espece/cd_nom/853398/tab/carte</a> ) | TRANSPORT- HITCHHIKERS: Hitchhikers on animals (except parasites, species transported by host/vector) | Established             | Established             | Established             |
| Plantae | Rhodophyta   | <i>Womersleyella setacea</i> (Hollenberg) R.E. Norris, 1992                                                                                                    | Eastern Indo-Pacific        | 1987 | Western Mediterranean Sea | Verlaque, 1989 [50]                                                                                                                                  | TRANSPORT- STOWAWAY: Ship/boat hull fouling                                                           | Absent                  | Absent                  | Established to invasive |
| Plantae | Rhodophyta   | <i>Xiphosiphonia pinnulata</i> (Kützinger) Savoie & G.W. Saunders, 2016                                                                                        | Central Indo-Pacific        | 1993 | Northern Seas             | Pezy et al. 2021 [51]                                                                                                                                | TRANSPORT- STOWAWAY: Ship/boat ballast water<br>TRANSPORT- STOWAWAY: Ship/boat hull fouling           | Established             | Established             | Established             |
| Plantae | Tracheophyta | <i>Halophila stipulacea</i> (Forsskål) Ascherson, 1867                                                                                                         | Western Indo-Pacific        | 2021 | Western Mediterranean Sea | Thibaut et al. 2022 [52]                                                                                                                             | CORRIDOR: Interconnected waterways/basins/ seas                                                       | Absent                  | Absent                  | Established             |
| Plantae | Tracheophyta | <i>Sporobolus alterniflorus</i> (Loisel.) P.M. Peterson & Saarela, 2014 [et non <i>Sporobolus alterniflora</i> Loisel.] = <i>Spartina alterniflora</i> Loisel. | Temperate Northern Pacific  | 1981 | Western Mediterranean Sea | Chevalier, 1923 [53]                                                                                                                                 | TRANSPORT- STOWAWAY: Ship/boat ballast water                                                          | Established to invasive | Established to invasive | Absent                  |
| Plantae | Tracheophyta | <i>Sporobolus anglicus</i> (C.E. Hubb.) P.M. Peterson & Saarela, 2014 [et non <i>Sporobolus anglica</i> C.E. Hubbard] = <i>Spartina anglica</i> C.E. Hubbard   | Across realms               | 1989 | Bay of Biscay             | Marchant, 1967 [54]                                                                                                                                  | UNKNOWN                                                                                               | Established             | Established             | Absent                  |
| Plantae | Tracheophyta | <i>Sporobolus pumilus</i> (Roth) P.M. Peterson & Saarela, 2014 [et non <i>Sporobolus patens</i> (Aiton) Muhl.] = <i>Spartina patens</i> (Aiton) Muhl           | Tropical Eastern Pacific    | 1977 | Western Mediterranean Sea | Fabre, 1849 [55]                                                                                                                                     | TRANSPORT- HITCHHIKERS: Hitchhikers on animals (except parasites, species transported by host/vector) | Absent                  | Established             | Established to invasive |
| Plantae | Tracheophyta | <i>Sporobolus x townsendii</i> (H. Groves & J. Groves) P.M. Peterson & Saarela,                                                                                | Tropical Atlantic           | 1967 | Northern Seas             | Corbière & Chevallier, 1922 [56]                                                                                                                     | UNKNOWN                                                                                               | Established to invasive | Established to invasive | Absent                  |

|           |            |                                                                                                                                                        |                             |             |                                                  |                                 |                                                                                                                                                                                                                                                                                                                    |             |             |             |
|-----------|------------|--------------------------------------------------------------------------------------------------------------------------------------------------------|-----------------------------|-------------|--------------------------------------------------|---------------------------------|--------------------------------------------------------------------------------------------------------------------------------------------------------------------------------------------------------------------------------------------------------------------------------------------------------------------|-------------|-------------|-------------|
|           |            | 2014 [et non <i>Sporobulus townsendii</i> var. <i>townsendii</i> H. & J. Groves]<br>= <i>Spartina townsendii</i> var. <i>townsendii</i> H. & J. Groves |                             |             |                                                  |                                 |                                                                                                                                                                                                                                                                                                                    |             |             |             |
| Chromista | Ochrophyta | <i>Acrothrix gracilis</i> Kylin, 1907                                                                                                                  | Across realms               | 1998        | Thau lagoon - Western Mediterranean Sea          | Verlaque, 2001 [13]             | TRANSPORT- HITCHHIKERS: Hitchhikers on animals (except parasites, species transported by host/vector)                                                                                                                                                                                                              | Absent      | Absent      | One record  |
| Chromista | Ochrophyta | <i>Chorda filum</i> (Linnaeus) Stackhouse, 1797                                                                                                        | Temperate Northern Atlantic | 1981        | Thau lagoon - Western Mediterranean Sea          | Riouall, 1985 [57]              | TRANSPORT- HITCHHIKERS: Hitchhikers on animals (except parasites, species transported by host/vector)                                                                                                                                                                                                              | Native      | Native      | Casual      |
| Chromista | Ochrophyta | <i>Chrysonephos lewisii</i> (W.R. Taylor) W.R. Taylor, 1952                                                                                            | Tropical Atlantic           | 1988        | Unknown - Western Mediterranean Sea              | Verlaque et al. 2015 [8]        | TRANSPORT- STOWAWAY: Angling/fishing equipment<br>TRANSPORT- STOWAWAY: Hitchhikers on ship/boat (excluding ballast water and hull fouling)<br>TRANSPORT- STOWAWAY: Ship/boat hull fouling<br>UNAIDED: Natural dispersal across borders of invasive alien species that have been introduced through pathways 1 to 5 | Absent      | Absent      | Casual      |
| Chromista | Ochrophyta | <i>Cladosiphon zosteræ</i> (J.Agardh) Kylin, 1940                                                                                                      | Temperate Northern Atlantic | 1977        | Unknown - Western Mediterranean Sea              | Boudouresque & Perret, 1977 [9] | TRANSPORT- HITCHHIKERS: Hitchhikers on animals (except parasites, species transported by host/vector)<br>TRANSPORT- STOWAWAY: Ship/boat hull fouling                                                                                                                                                               | Native      | Native      | Established |
| Chromista | Ochrophyta | <i>Colpomenia peregrina</i> Sauvageau, 1927<br>= <i>C. sinuosa</i> (Mertens ex Roth) Derbès & Solier 1851                                              | Temperate Northern Pacific  | 1905        | Vannes - Bay of Biscay                           | Fabre-Domergue, 1906 [58]       | TRANSPORT- HITCHHIKERS: Hitchhikers on animals (except parasites, species transported by host/vector)                                                                                                                                                                                                              | Established | Established | Established |
| Chromista | Ochrophyta | <i>Cutleria multifida</i> (Turner) Greville, 1830                                                                                                      | Temperate Northern Atlantic | Before 1931 | Villefranche-sur-Mer - Western Mediterranean Sea | Sauvageau, 1931 [21]            | UNKNOWN                                                                                                                                                                                                                                                                                                            | Native      | Native      | Established |
| Chromista | Ochrophyta | <i>Desmaretia viridis</i> (O.F.Müller) J.V.Lamouroux, 1813                                                                                             | Across realms               | 1978        | Thau lagoon - Western Mediterranean Sea          | Verlaque, 1981 [46]             | TRANSPORT- HITCHHIKERS: Hitchhikers on animals (except parasites, species transported by host/vector)                                                                                                                                                                                                              | Native      | Native      | Casual      |
| Chromista | Ochrophyta | <i>Dictyota cyanoloma</i> Tronholm, De Clerck, A.Gómez-Garreta & Rull Lluch, 2010                                                                      | Temperate Australasia       | 1999        | Cannes - Western Mediterranean Sea               | Steen et al. 2017 [59]          | TRANSPORT- STOWAWAY: Ship/boat hull fouling                                                                                                                                                                                                                                                                        | Absent      | Established | Established |
| Chromista | Ochrophyta | <i>Halothrix lumbricalis</i> (Kützinger) Reinke, 1888                                                                                                  | Temperate Northern Atlantic | 1985        | Western Mediterranean Sea                        | Ben Maiz 1986 [6]               | TRANSPORT- HITCHHIKERS: Hitchhikers on animals (except parasites, species transported by host/vector)<br>TRANSPORT- STOWAWAY: Ship/boat hull fouling                                                                                                                                                               | Native      | Native      | Casual      |
| Chromista | Ochrophyta | <i>Leathesia marina</i> (Lyngbye) Decaisne, 1842                                                                                                       | Temperate Northern Atlantic | Before 1905 | Western Mediterranean Sea                        | Calvet, 1905 [60]               | TRANSPORT- HITCHHIKERS: Hitchhikers on animals (except parasites, species transported by host/vector)                                                                                                                                                                                                              | Native      | Native      | Established |
| Chromista | Ochrophyta | <i>Macrocystis pyrifera</i> (Linnaeus) C.Agardh, 1820                                                                                                  | Temperate Australasia       | 1972        | Northern Seas                                    | Braud et al. 1974 [61]          | TRANSPORT- HITCHHIKERS: Hitchhikers on animals (except parasites, species transported by host/vector)                                                                                                                                                                                                              | Extinct     | Absent      | Absent      |
| Chromista | Ochrophyta | <i>Punctaria tenuissima</i> (C.Agardh) Greville, 1830                                                                                                  | Temperate Northern Atlantic | Before 1971 | Western Mediterranean Sea                        | Verlaque, 2001 [13]             | TRANSPORT- HITCHHIKERS: Hitchhikers on animals (except parasites, species transported by host/vector)                                                                                                                                                                                                              | Native      | Native      | Casual      |

|           |            |                                                                                       |                             |      |                                     |                                                        |                                                                                                                                                                                                                                |             |                         |                         |
|-----------|------------|---------------------------------------------------------------------------------------|-----------------------------|------|-------------------------------------|--------------------------------------------------------|--------------------------------------------------------------------------------------------------------------------------------------------------------------------------------------------------------------------------------|-------------|-------------------------|-------------------------|
| Chromista | Ochrophyta | <i>Pylaiella littoralis</i> (Linnaeus) Kjellman, nom. cons., 1872                     | Temperate Northern Atlantic | 1912 | Northern Seas                       | Hariot, 1912 [62]                                      | TRANSPORT- HITCHHIKERS: Hitchhikers on animals (except parasites, species transported by host/vector)                                                                                                                          | Established | Established             | Casual                  |
| Chromista | Ochrophyta | <i>Rugulopteryx okamurae</i> (E.Y.Dawson) I.K.Hwang, W.J.Lee & H.S.Kim, 2009          | Temperate Northern Pacific  | 2002 | Western Mediterranean Sea           | Verlaque et al. 2009 [63]                              | TRANSPORT- HITCHHIKERS: Hitchhikers on animals (except parasites, species transported by host/vector)                                                                                                                          | Absent      | Absent                  | Established to invasive |
| Chromista | Ochrophyta | <i>Saccharina japonica</i> (Areschoug) C.E.Lane, C.Mayes, Druehl & G.W.Saunders, 2006 | Temperate Northern Pacific  | 1976 | Western Mediterranean Sea           | Ben Maiz, 1986 [6]                                     | TRANSPORT- HITCHHIKERS: Hitchhikers on animals (except parasites, species transported by host/vector)                                                                                                                          | Absent      | Absent                  | Casual                  |
| Chromista | Ochrophyta | <i>Sargassum muticum</i> (Yendo) Fensholt, 1955                                       | Temperate Northern Pacific  | 1975 | Northern Seas                       | Gruet, 1976 [64]                                       | TRANSPORT- HITCHHIKERS: Hitchhikers on animals (except parasites, species transported by host/vector)<br>UNAIDED: Natural dispersal across borders of invasive alien species that have been introduced through pathways 1 to 5 | Invasive    | Invasive                | Invasive                |
| Chromista | Ochrophyta | <i>Scytosiphon dotyi</i> M.J.Wynne, 1969                                              | Temperate Northern Pacific  | 1994 | Western Mediterranean Sea           | Verlaque, 2001 [13]                                    | TRANSPORT- HITCHHIKERS: Hitchhikers on animals (except parasites, species transported by host/vector)                                                                                                                          | Absent      | Absent                  | Casual                  |
| Chromista | Ochrophyta | <i>Sphaerotrichia divaricata</i> (C.Agardh) Kylin, 1940                               | Hybridization               | 1894 | Bay of Biscay                       | Riouall, 1985 [57]                                     | TRANSPORT- HITCHHIKERS: Hitchhikers on animals (except parasites, species transported by host/vector)                                                                                                                          | Established | Casual                  | Absent                  |
| Chromista | Ochrophyta | <i>Sphaerotrichia firma</i> (E.S.Gepp) A.D.Zinova, 1958                               | Temperate Northern Atlantic | 1849 | Western Mediterranean Sea           | Riouall, 1985 [57]                                     | TRANSPORT- HITCHHIKERS: Hitchhikers on animals (except parasites, species transported by host/vector)                                                                                                                          | Absent      | Absent                  | Casual                  |
| Chromista | Ochrophyta | <i>Undaria pinnatifida</i> (Harvey) Suringar, 1873                                    | Temperate Northern Pacific  | 1971 | Western Mediterranean Sea           | Perez et al. 1981 [65]                                 | TRANSPORT- HITCHHIKERS: Hitchhikers on animals (except parasites, species transported by host/vector)<br>RELEASE IN NATURE: Fishery in the wild (including game fishing)                                                       | Invasive    | Established to Invasive | Established             |
| Animalia  | Annelida   | <i>Arhynchite arhynchite</i> (Ikeda, 1924)                                            | Central Indo-Pacific        | 2001 | Unknown - Western Mediterranean Sea | Saiz Salinas & Amouroux, 2010 [66]                     | TRANSPORT- STOWAWAY: Ship/boat ballast water                                                                                                                                                                                   | Absent      | Absent                  | Casual                  |
| Animalia  | Annelida   | <i>Bispira polyomma</i> Giangrande & Faasse, 2012                                     | Cryptogenic                 | 2017 | Brest - Northern Seas               | Droual et al. submitted; ICES, 2022 [67,68]            | TRANSPORT- HITCHHIKERS: Hitchhikers on animals (except parasites, species transported by host/vector)<br>TRANSPORT- STOWAWAY: Ship/boat hull fouling<br>TRANSPORT- STOWAWAY: Ship/boat ballast water                           | Established | Established             | Absent                  |
| Animalia  | Annelida   | <i>Boccardia polybranchia</i> (Haswell, 1885)                                         | Cryptogenic                 | 1919 | North cotentin - Northern Seas      | Fauvel, 1927 [69]                                      | TRANSPORT- HITCHHIKERS: Hitchhikers on animals (except parasites, species transported by host/vector)                                                                                                                          | Established | Established             | Absent                  |
| Animalia  | Annelida   | <i>Boccardia proboscidea</i> Hartman, 1940                                            | Temperate Northern Pacific  | 1999 | Leucate - Western Mediterranean Sea | Radashevsky et al. 2019 [70]                           | TRANSPORT- STOWAWAY: Ship/boat ballast water                                                                                                                                                                                   | Established | Established             | Established             |
| Animalia  | Annelida   | <i>Boccardia pseudonatrix</i> Day, 1961                                               | Temperate Southern Africa   | 2018 | Normandy - Northern Seas            | Sato-Okoshi et al. 2022 [71]                           | TRANSPORT- HITCHHIKERS: Hitchhikers on animals (except parasites, species transported by host/vector)                                                                                                                          | Established | Absent                  | Absent                  |
| Animalia  | Annelida   | <i>Boccardia semibranchiata</i> Guérin, 1990                                          | Mediterranean Sea           | 1999 | Arcachon - Bay of Biscay            | Gagnon, 1999 [72]                                      | TRANSPORT- HITCHHIKERS: Hitchhikers on animals (except parasites, species transported by host/vector)                                                                                                                          | Established | Established             | Native                  |
| Animalia  | Annelida   | <i>Boccardiella hamata</i> (Webster, 1879)                                            | Temperate Northern Atlantic | 2012 | Unknown                             | Sauriau et al. 2013 (WFD data) [73]                    | TRANSPORT- HITCHHIKERS: Hitchhikers on animals (except parasites, species transported by host/vector)                                                                                                                          | Established | Established             | Absent                  |
| Animalia  | Annelida   | <i>Branchiommma luctuosum</i> (Grube, 1870)                                           | Western Indo-Pacific        | 2021 | Toulon - Western Mediterranean Sea  | de Vogüé pers. comm. 2022 ; Tiralongo et al. 2022 [74] | UNKNOWN                                                                                                                                                                                                                        | Absent      | Absent                  | Casual                  |

|          |          |                                                                      |                             |             |                                    |                                                      |                                                                                                                                                       |                         |                         |                         |
|----------|----------|----------------------------------------------------------------------|-----------------------------|-------------|------------------------------------|------------------------------------------------------|-------------------------------------------------------------------------------------------------------------------------------------------------------|-------------------------|-------------------------|-------------------------|
| Animalia | Annelida | <i>Chaetozone corona</i> Berkeley & Berkeley, 1941                   | Temperate Northern Pacific  | 1996        | Glénan Archipelago - Bay of Biscay | Le Garrec et al. 2017 [75]                           | TRANSPORT- STOWAWAY: Ship/boat ballast water<br>TRANSPORT- HITCHHIKERS: Hitchhikers on animals (except parasites, species transported by host/vector) | Established             | Established             | Established             |
| Animalia | Annelida | <i>Clymenella torquata</i> (Leidy, 1855)                             | Temperate Northern Atlantic | 1977        | Unknown - Northern Seas            | Glaçon, 1977 [76]                                    | TRANSPORT- STOWAWAY: Ship/boat ballast water                                                                                                          | One record              | Absent                  | Absent                  |
| Animalia | Annelida | <i>Euchone limnicola</i> Reish, 1959                                 | Temperate Northern Pacific  | 2015        | Dunkerque - Northern Seas          | Guyonnet & Borg, 2015 [77]                           | TRANSPORT- STOWAWAY: Ship/boat ballast water<br>TRANSPORT- STOWAWAY: Ship/boat hull fouling                                                           | Established             | Established             | Absent                  |
| Animalia | Annelida | <i>Ficopomatus enigmaticus</i> (Fauvel, 1923)                        | Temperate Australasia       | 1921        | Caen - Northern Seas               | Fauvel, 1927 [69]                                    | TRANSPORT- STOWAWAY: Ship/boat ballast water<br>TRANSPORT- STOWAWAY: Ship/boat hull fouling                                                           | Established to invasive | Established to invasive | Established to invasive |
| Animalia | Annelida | <i>Goniadella gracilis</i> (Verrill, 1873)                           | Temperate Northern Atlantic | 2001        | Bay of Biscay                      | Blanchet et al. 2004 [78]                            | TRANSPORT- STOWAWAY: Ship/boat ballast water<br>TRANSPORT- STOWAWAY: Ship/boat hull fouling                                                           | Established             | Established             | Casual                  |
| Animalia | Annelida | <i>Hydroides dianthus</i> (Verrill, 1873)                            | Cryptogenic                 | 1906        | Western Mediterranean Sea          | Saint-Joseph, 1906 [79]                              | TRANSPORT- HITCHHIKERS: Hitchhikers on animals (except parasites, species transported by host/vector)<br>TRANSPORT- STOWAWAY: Ship/boat hull fouling  | Established             | Established             | Absent                  |
| Animalia | Annelida | <i>Hydroides dirampha</i> Mörch, 1863                                | Tropical Atlantic           | 2019        | Western Mediterranean Sea          | Tempesti et al. 2022 [80]                            | UNKNOWN                                                                                                                                               | Absent                  | Absent                  | One record              |
| Animalia | Annelida | <i>Hydroides elegans</i> (Haswell, 1883) [nomen protectum]           | Temperate Australasia       | Before 1944 | Western Mediterranean Sea          | Berner, 1944 [81]                                    | TRANSPORT- STOWAWAY: Ship/boat hull fouling<br>TRANSPORT- STOWAWAY: Ship/boat ballast water                                                           | Casual                  | Casual                  | Casual                  |
| Animalia | Annelida | <i>Hydroides ezoensis</i> Okuda, 1934                                | Temperate Northern Pacific  | 1968        | Bay of Biscay                      | Zibrowius, 1978 [82]                                 | TRANSPORT- STOWAWAY: Ship/boat ballast water<br>TRANSPORT- HITCHHIKERS: Hitchhikers on animals (except parasites, species transported by host/vector) | Established             | Established             | Absent                  |
| Animalia | Annelida | <i>Lysidice collaris</i> Grube, 1870                                 | Western Indo-Pacific        | 2022        | Western Mediterranean Sea          | Conté, 2022 [83]                                     | UNKNOWN                                                                                                                                               | Absent                  | Absent                  | Established             |
| Animalia | Annelida | <i>Marenzelleria viridis</i> (Verrill, 1873)                         | Temperate Northern Atlantic | 2009        | Northern Seas                      | Dewarumez et al. 2011 [84]                           | TRANSPORT- STOWAWAY: Ship/boat ballast water                                                                                                          | Casual                  | Absent                  | Absent                  |
| Animalia | Annelida | <i>Marphysa victori</i> Lavesque, Daffe, Bonifácio & Hutchings, 2017 | Temperate Northern Pacific  | 2016        | Bay of Biscay                      | Lavesque et al. 2017 [85]; Lavesque et al. 2020 [86] | TRANSPORT- HITCHHIKERS: Hitchhikers on animals (except parasites, species transported by host/vector)                                                 | Absent                  | Established             | Absent                  |
| Animalia | Annelida | <i>Metasychis gotoi</i> (Izuka, 1902)                                | Temperate Northern Pacific  | 2003        | Bay of Biscay                      | REBENT Program                                       | UNKNOWN                                                                                                                                               | Absent                  | One record              | Absent                  |
| Animalia | Annelida | <i>Neanthes agulhana</i> (Day, 1963)                                 | Western Indo-Pacific        | 2010        | Western Mediterranean Sea          | CARTHAM Program                                      | UNKNOWN                                                                                                                                               | Absent                  | Absent                  | Established             |
| Animalia | Annelida | <i>Neodexiospira brasiliensis</i> (Grube, 1872)                      | Tropical Atlantic           | 1976        | Northern Seas                      | In Pezy et al. 2021 [51]                             | TRANSPORT- HITCHHIKERS: Hitchhikers on animals (except parasites, species transported by host/vector)<br>TRANSPORT- STOWAWAY: Ship/boat hull fouling  | Casual                  | Casual                  | Absent                  |
| Animalia | Annelida | <i>Nereis jacksoni</i> Kinberg, 1865                                 | Temperate Australasia       | 1964        | Western Mediterranean Sea          | Harmelin, 1964 [87]                                  | UNKNOWN                                                                                                                                               | Absent                  | Absent                  | Casual                  |
| Animalia | Annelida | <i>Notomastus aberans</i> Day, 1957                                  | Western Indo-Pacific        | 1964        | Western Mediterranean Sea          | Harmelin, 1968 [88]                                  | UNKNOWN                                                                                                                                               | Absent                  | Absent                  | Casual                  |

|          |            |                                                                                 |                             |      |                                                                 |                                                                                                                                  |                                                                                                                                                          |                         |                         |             |
|----------|------------|---------------------------------------------------------------------------------|-----------------------------|------|-----------------------------------------------------------------|----------------------------------------------------------------------------------------------------------------------------------|----------------------------------------------------------------------------------------------------------------------------------------------------------|-------------------------|-------------------------|-------------|
| Animalia | Annelida   | <i>Palola valida</i> (Gravier, 1900)                                            | Western Indo-Pacific        | 2022 | Western Mediterranean Sea                                       | Conté, 2022 [83]                                                                                                                 | UNKNOWN                                                                                                                                                  | Absent                  | Absent                  | Established |
| Animalia | Annelida   | <i>Pileolaria berkeleyana</i> (Rioja, 1942)                                     | Temperate Northern Pacific  | 1977 | Western Mediterranean Sea                                       | Zibrowius & Bianchi, 1981 [89]                                                                                                   | TRANSPORT- HITCHHIKERS: Hitchhikers on animals (except parasites, species transported by host/vector)<br>TRANSPORT- STOWAWAY: Ship/boat ballast water    | Absent                  | Established             | Established |
| Animalia | Annelida   | <i>Polydora colonia</i> Moore, 1907                                             | Temperate Northern Atlantic | 2016 | Northern Seas                                                   | IMPECAPE Program                                                                                                                 | TRANSPORT- HITCHHIKERS: Hitchhikers on animals (except parasites, species transported by host/vector)                                                    | Established             | Established             | Absent      |
| Animalia | Annelida   | <i>Polydora hoplura</i> Claparède, 1868                                         | Mediterranean Sea           | 1884 | Northern Seas                                                   | Fauvel, 1923 [90]                                                                                                                | TRANSPORT- HITCHHIKERS: Hitchhikers on animals (except parasites, species transported by host/vector)                                                    | Established             | Established             | Native      |
| Animalia | Annelida   | <i>Polydora onagawaensis</i> Teramoto, Sato-Okoshi, Abe, Nishitani & Endo, 2013 | Temperate Northern Pacific  | 2018 | Northern Seas                                                   | Sato-Okoshi et al. 2022 [71]                                                                                                     | TRANSPORT- HITCHHIKERS: Hitchhikers on animals (except parasites, species transported by host/vector)                                                    | Casual                  | Absent                  | Absent      |
| Animalia | Annelida   | <i>Polydora websteri</i> Hartman in Loosanoff & Engle, 1943                     | Temperate Northern Atlantic | 2018 | Northern Seas                                                   | Sato-Okoshi et al. 2022 [71]                                                                                                     | TRANSPORT- HITCHHIKERS: Hitchhikers on animals (except parasites, species transported by host/vector)                                                    | Established             | Absent                  | Absent      |
| Animalia | Annelida   | <i>Pseudopolydora kempii japonica</i> Imajima & Hartman, 1964                   | Temperate Northern Pacific  | 2015 | Bay of Biscay                                                   | Latry et al. in prep.                                                                                                            | TRANSPORT- HITCHHIKERS: Hitchhikers on animals (except parasites, species transported by host/vector)                                                    | Absent                  | Established             | Absent      |
| Animalia | Annelida   | <i>Pseudopolydora paucibranchiata</i> (Okuda, 1937)                             | Temperate Northern Pacific  | 2011 | Bay of Biscay                                                   | WFD Programme for the oldest record; Radashevsky et al. 2020 for the status                                                      | TRANSPORT- HITCHHIKERS: Hitchhikers on animals (except parasites, species transported by host/vector)                                                    | Established             | Established             | Established |
| Animalia | Annelida   | <i>Spirorbis (Spirorbis) marioni</i> Caullery & Mesnil, 1897                    | Western Indo-Pacific        | 1977 | Western Mediterranean Sea                                       | Zibrowius & Bianchi, 1981 [89]                                                                                                   | TRANSPORT- STOWAWAY: Ship/boat ballast water<br>TRANSPORT- STOWAWAY: Ship/boat hull fouling                                                              | Absent                  | Absent                  | Established |
| Animalia | Annelida   | <i>Streblospio benedicti</i> Webster, 1879                                      | Temperate Northern Atlantic | 1982 | Bay of Biscay                                                   | da Fonsêca-Genevois & Cazaux, 1987 [91]                                                                                          | TRANSPORT- STOWAWAY: Ship/boat hull fouling                                                                                                              | Established             | Established             | Absent      |
| Animalia | Annelida   | <i>Syllis hyllebergi</i> (Licher, 1999)                                         | Western Indo-Pacific        | 2019 | Western Mediterranean Sea                                       | Tempesti et al. 2022 [80]                                                                                                        | CORRIDOR: Interconnected waterways/basins/ seas<br>TRANSPORT- HITCHHIKERS: Hitchhikers on animals (except parasites, species transported by host/vector) | Absent                  | Absent                  | Casual      |
| Animalia | Annelida   | <i>Terebella ehrenbergi</i> Grube, 1869                                         | Temperate Northern Pacific  | 1950 | Western Mediterranean Sea                                       | Pérès, 1952 [92]                                                                                                                 | TRANSPORT- STOWAWAY: Ship/boat ballast water<br>TRANSPORT- STOWAWAY: Ship/boat hull fouling                                                              | Absent                  | Absent                  | One record  |
| Animalia | Annelida   | <i>Thelepus japonicus</i> Marenzeller, 1884                                     | Temperate Northern Pacific  | 2017 | Bay of Biscay                                                   | Lavesque et al. 2020 [93]                                                                                                        | TRANSPORT- HITCHHIKERS: Hitchhikers on animals (except parasites, species transported by host/vector)                                                    | Established             | Established             | Absent      |
| Animalia | Arthropoda | <i>Acantharctus posteli</i> (Forest, 1963)                                      | Tropical Atlantic           | 2014 | Port Cros - Western Mediterranean Sea                           | INPN ( <a href="https://inpn.mnhn.fr/espece/c_d_nom/530132/tab/carte">https://inpn.mnhn.fr/espece/c_d_nom/530132/tab/carte</a> ) | UNKNOWN                                                                                                                                                  | Absent                  | Absent                  | Casual      |
| Animalia | Arthropoda | <i>Acartia (Acanthacartia) tonsa</i> Dana, 1849                                 | Central Indo-Pacific        | 1925 | Caen - Northern Seas                                            | Remy, 1927 [94]                                                                                                                  | TRANSPORT- STOWAWAY: Ship/boat ballast water                                                                                                             | Established to invasive | Established to invasive | Established |
| Animalia | Arthropoda | <i>Acartia (Acartiura) omorii</i> Bradford, 1976                                | Temperate Northern Pacific  | 2004 | Off Calais - Northern Seas                                      | Seuront, 2005 [95]                                                                                                               | TRANSPORT- STOWAWAY: Ship/boat ballast water                                                                                                             | Casual                  | Absent                  | Absent      |
| Animalia | Arthropoda | <i>Ammothea hilgendorfi</i> (Böhm, 1879)                                        | Temperate Northern Pacific  | 2019 | Ria d'Etel & Bastia - Western Mediterranean Sea & Bay of Biscay | Le Roux et al. 2020 [96]; Tempesti et al. 2022 [80]                                                                              | TRANSPORT- HITCHHIKERS: Hitchhikers on animals (except parasites, species transported by host/vector)                                                    | Casual                  | Casual                  | Casual      |

|          |            |                                                          |                             |             |                                                        |                              |                                                                                                                                                                                                      |                         |                         |                         |
|----------|------------|----------------------------------------------------------|-----------------------------|-------------|--------------------------------------------------------|------------------------------|------------------------------------------------------------------------------------------------------------------------------------------------------------------------------------------------------|-------------------------|-------------------------|-------------------------|
| Animalia | Arthropoda | <i>Amphibalanus amphitrite amphitrite</i> (Darwin, 1854) | Central Indo-Pacific        | 1886        | Ouistreham - Northern Seas                             | Bishop, 1950 [97]            | TRANSPORT- STOWAWAY: Ship/boat hull fouling                                                                                                                                                          | Established             | Established             | Established             |
| Animalia | Arthropoda | <i>Amphibalanus eburneus</i> (Gould, 1841)               | Temperate Northern Atlantic | 1872        | La Rochelle - Bay of Biscay                            | Barnes et al. 1972 [98]      | TRANSPORT- STOWAWAY: Ship/boat hull fouling                                                                                                                                                          | Established             | Established             | Established             |
| Animalia | Arthropoda | <i>Amphibalanus improvisus</i> (Darwin, 1854)            | Temperate Northern Atlantic | 1872        | Coasts of Charente and in Arcachon Bay - Bay of Biscay | Fischer, 1872 [99]           | TRANSPORT- STOWAWAY: Ship/boat hull fouling                                                                                                                                                          | Established             | Established             | Established             |
| Animalia | Arthropoda | <i>Amphibalanus reticulatus</i> (Utinomi, 1967)          | Central Indo-Pacific        | 1977        | Toulon - Western Mediterranean Sea                     | Gouilletquer, 2016 [100]     | TRANSPORT- STOWAWAY: Ship/boat hull fouling                                                                                                                                                          | Absent                  | Absent                  | Casual                  |
| Animalia | Arthropoda | <i>Ampithoe valida</i> S.I. Smith, 1873                  | Temperate Northern Atlantic | 2000        | Thau lagoon - Western Mediterranean Sea                | Faasse, 2015 [101]           | TRANSPORT- STOWAWAY: Ship/boat hull fouling<br>TRANSPORT- STOWAWAY: Ship/boat ballast water<br>TRANSPORT- HITCHHIKERS: Hitchhikers on animals (except parasites, species transported by host/vector) | Established             | Established             | Casual                  |
| Animalia | Arthropoda | <i>Aoroides curvipes</i> Ariyama, 2004                   | Temperate Northern Pacific  | 2009        | Arcachon bay - Bay of Biscay                           | Gouillieux et al. 2016 [102] | TRANSPORT- HITCHHIKERS: Hitchhikers on animals (except parasites, species transported by host/vector)                                                                                                | Absent                  | Established             | Absent                  |
| Animalia | Arthropoda | <i>Aoroides longimerus</i> Ren & Zheng, 1996             | Temperate Northern Pacific  | 2013        | Arcachon bay - Bay of Biscay                           | Gouillieux et al. 2016 [102] | TRANSPORT- HITCHHIKERS: Hitchhikers on animals (except parasites, species transported by host/vector)                                                                                                | Established             | Established             | Absent                  |
| Animalia | Arthropoda | <i>Aoroides semicurvatus</i> Ariyama, 2004               | Temperate Northern Pacific  | 2009        | Arcachon bay - Bay of Biscay                           | Gouillieux et al. 2016 [102] | TRANSPORT- HITCHHIKERS: Hitchhikers on animals (except parasites, species transported by host/vector)                                                                                                | Established             | Established             | Absent                  |
| Animalia | Arthropoda | <i>Artemia monica</i> Verrill, 1869                      | Temperate Northern Pacific  | 1972        | Sète - Western Mediterranean Sea                       | Thiery & Robert, 1992 [103]  | UNKNOWN                                                                                                                                                                                              | Absent                  | Casual                  | Casual                  |
| Animalia | Arthropoda | <i>Austrominius modestus</i> (Darwin, 1854)              | Temperate Australasia       | 1950        | Wimereux - Northern Seas                               | Bishop, 1954 [104]           | TRANSPORT- STOWAWAY: Ship/boat hull fouling<br>TRANSPORT- HITCHHIKERS: Hitchhikers on animals (except parasites, species transported by host/vector)                                                 | Established to invasive | Established to invasive | Established to invasive |
| Animalia | Arthropoda | <i>Balanus trigonus</i> Darwin, 1854                     | Across realms               | 1920        | Unknown - Western Mediterranean Sea                    | Gruvel, 1920 [105]           | TRANSPORT- STOWAWAY: Ship/boat ballast water<br>TRANSPORT- HITCHHIKERS: Hitchhikers on animals (except parasites, species transported by host/vector)                                                | Absent                  | Casual                  | Casual                  |
| Animalia | Arthropoda | <i>Brachynotus sexdentatus</i> (Risso, 1827)             | Mediterranean Sea           | Before 1963 | Roscoff - Northern Seas                                | Bourdon, 1965 [106]          | TRANSPORT- STOWAWAY: Ship/boat hull fouling<br>TRANSPORT- STOWAWAY: Ship/boat ballast water                                                                                                          | Established             | Established             | Native                  |
| Animalia | Arthropoda | <i>Callinectes sapidus</i> Rathbun, 1896                 | Tropical Atlantic           | 1900        | Rochefort - Bay of Biscay                              | Bouvier, 1901 [107]          | TRANSPORT- STOWAWAY: Ship/boat ballast water                                                                                                                                                         | Casual                  | Extinct                 | Invasive                |
| Animalia | Arthropoda | <i>Caprella mutica</i> Schurin, 1935                     | Temperate Northern Pacific  | 2004        | Le Havre - Northern Seas                               | Breton, 2005 [108]           | TRANSPORT- STOWAWAY: Ship/boat hull fouling<br>TRANSPORT- STOWAWAY: Ship/boat ballast water                                                                                                          | Established             | Established             | Established             |
| Animalia | Arthropoda | <i>Caprella scaura</i> Templeton, 1836                   | Western Indo-Pacific        | 2012        | Ajaccio - Western Mediterranean Sea                    | Ros et al. 2014 [109]        | TRANSPORT- STOWAWAY: Ship/boat hull fouling<br>TRANSPORT- STOWAWAY: Ship/boat ballast water                                                                                                          | Absent                  | Established             | Established             |
| Animalia | Arthropoda | <i>Chelicorophium curvispinum</i> (G.O. Sars, 1895)      | Black & Caspian Seas        | 2006        | Bay of Somme - Northern Seas                           | Dewarumez et al. 2011 [84]   | CORRIDOR: Interconnected waterways/basins/ seas<br>TRANSPORT- STOWAWAY: Ship/boat ballast water<br>TRANSPORT- HITCHHIKERS: Hitchhikers                                                               | Casual                  | Absent                  | Absent                  |

|          |            |                                                           |                                 |             |                                     |                              |                                                                                                                                                                                                      |             |             |             |
|----------|------------|-----------------------------------------------------------|---------------------------------|-------------|-------------------------------------|------------------------------|------------------------------------------------------------------------------------------------------------------------------------------------------------------------------------------------------|-------------|-------------|-------------|
|          |            |                                                           |                                 |             |                                     |                              | on animals (except parasites, species transported by host/vector)                                                                                                                                    |             |             |             |
| Animalia | Arthropoda | <i>Dyspanopeus sayi</i> (Smith, 1869)                     | Temperate Northern Atlantic     | 2007        | Seudre Estuary - Bay of Biscay      | Aubert & Sauriau, 2015 [110] | TRANSPORT- STOWAWAY: Ship/boat hull fouling<br>TRANSPORT- STOWAWAY: Ship/boat ballast water                                                                                                          | Absent      | Established | Absent      |
| Animalia | Arthropoda | <i>Eocuma sarsii</i> (Kossmann), 1880                     | Western Indo-Pacific            | 1901        | Unknown - Western Mediterranean Sea | Walker, 1901 [111]           | CORRIDOR: Interconnected waterways/basins/ seas                                                                                                                                                      | Absent      | Absent      | Established |
| Animalia | Arthropoda | <i>Eriocheir sinensis</i> H. Milne Edwards, 1853          | Temperate Northern Pacific      | 1930-1936   | Boulogne-sur-mer - Northern Seas    | Hoestlandt, 1948 [112]       | TRANSPORT- STOWAWAY: Ship/boat ballast water                                                                                                                                                         | Established | Established | Casual      |
| Animalia | Arthropoda | <i>Eurytemora americana</i> Williams, 1906                | Temperate Northern Atlantic     | 1977        | Dunkerque - Northern Seas           | Brylinski 2009 [113]         | TRANSPORT- STOWAWAY: Ship/boat ballast water<br>TRANSPORT- STOWAWAY: Ship/boat hull fouling                                                                                                          | Established | Absent      | Absent      |
| Animalia | Arthropoda | <i>Eurytemora pacifica</i> Sato, 1913                     | Temperate Northern Pacific      | 1986        | Marennes-Oléron - Bay of Biscay     | Sautour, 1991 [114]          | TRANSPORT- STOWAWAY: Ship/boat ballast water<br>TRANSPORT- STOWAWAY: Ship/boat hull fouling<br>TRANSPORT- HITCHHIKERS: Hitchhikers on animals (except parasites, species transported by host/vector) | Absent      | Established | Absent      |
| Animalia | Arthropoda | <i>Fistulobalanus albicostatus</i> (Pilsbry, 1916)        | Temperate Northern Pacific      | 1973-1974   | Bay of Biscay                       | Gruet et al. 1976 [115]      | TRANSPORT- HITCHHIKERS: Hitchhikers on animals (except parasites, species transported by host/vector)                                                                                                | Absent      | Extinct     | Absent      |
| Animalia | Arthropoda | <i>Grandidierella japonica</i> Stephensen, 1938           | Temperate Northern Pacific      | 2010        | Bay of Biscay                       | Jourde et al. 2013 [116]     | TRANSPORT- HITCHHIKERS: Hitchhikers on animals (except parasites, species transported by host/vector)                                                                                                | Established | Established | Absent      |
| Animalia | Arthropoda | <i>Guinearma alberti</i> (Rathbun, 1921)                  | Tropical Atlantic               | 2016        | Northern Seas                       | Pezy et al. 2017 [117]       | RELEASE IN NATURE: Other intentional release                                                                                                                                                         | One record  | Absent      | Absent      |
| Animalia | Arthropoda | <i>Hemigrapsus sanguineus</i> (De Haan, 1835)             | Temperate Northern Pacific      | 1999        | Northern Seas                       | Breton et al. 2002 [118]     | TRANSPORT- STOWAWAY: Ship/boat ballast water                                                                                                                                                         | Invasive    | Absent      | Absent      |
| Animalia | Arthropoda | <i>Hemigrapsus takanoi</i> Asakura & Watanabe, 2005       | Temperate Northern Pacific      | 1993        | Bay of Biscay                       | Noël et al. 1997 [119]       | TRANSPORT- STOWAWAY: Ship/boat ballast water                                                                                                                                                         | Invasive    | Established | Absent      |
| Animalia | Arthropoda | <i>Hemimysis anomala</i> G.O. Sars, 1907                  | Black Sea and Mediterranean Sea | 2000        | Unknown                             | Baffreau et al. 2018 [41]    | TRANSPORT- STOWAWAY: Ship/boat hull fouling<br>TRANSPORT- STOWAWAY: Ship/boat ballast water                                                                                                          | Casual      | Absent      | Native      |
| Animalia | Arthropoda | <i>Homarus americanus</i> H. Milne Edwards, 1837          | Temperate Northern Atlantic     | Before 1970 | Northern Seas                       | D'Udekem d'Acoz, 1999 [120]  | TRANSPORT- STOWAWAY: Ship/boat ballast water<br>TRANSPORT- STOWAWAY: Ship/boat hull fouling<br>RELEASE IN NATURE: Fishery in the wild (including game fishing)                                       | Casual      | Casual      | Absent      |
| Animalia | Arthropoda | <i>Ianiropsis serricaudis</i> Gurjanova, 1936             | Temperate Northern Pacific      | 2013        | Bay of Biscay                       | Gouillieux et al. 2018 [121] | TRANSPORT- HITCHHIKERS: Hitchhikers on animals (except parasites, species transported by host/vector)                                                                                                | Established | Established | Established |
| Animalia | Arthropoda | <i>Incisocalliope aestuarius</i> (Watling & Maurer, 1973) | Temperate Northern Atlantic     | 1975        | Bay of Biscay                       | Bachelet et al. 2020 [122]   | UNKNOWN                                                                                                                                                                                              | Established | Established | Absent      |
| Animalia | Arthropoda | <i>Limnoria lignorum</i> (Rathke, 1799)                   | Cryptogenic                     | 1878        | Northern Seas                       | Clavenad, 1879 [123]         | UNKNOWN                                                                                                                                                                                              | Casual      | Casual      | Casual      |
| Animalia | Arthropoda | <i>Limnoria quadripunctata</i> Holthuis, 1949             | Cryptogenic                     | 1972        | Bay of Biscay                       | Blanchard et al. 2010 [124]  | TRANSPORT- STOWAWAY: Ship/boat ballast water<br>TRANSPORT- STOWAWAY: Ship/boat hull fouling                                                                                                          | Casual      | Casual      | Absent      |

|          |            |                                                   |                             |              |                           |                               |                                                                                                                                                                                                      |                                      |                                      |             |
|----------|------------|---------------------------------------------------|-----------------------------|--------------|---------------------------|-------------------------------|------------------------------------------------------------------------------------------------------------------------------------------------------------------------------------------------------|--------------------------------------|--------------------------------------|-------------|
| Animalia | Arthropoda | <i>Limnoria tripunctata</i> Menzies, 1951         | Cryptogenic                 | 2009         | Bay of Biscay             | Le Roux, 2009 [125]           | UNKNOWN                                                                                                                                                                                              | Absent                               | Casual                               | Absent      |
| Animalia | Arthropoda | <i>Megabalanus tintinnabulum</i> (Linnaeus, 1758) | Across realms               | in the 1970s | Bay of Biscay             | Gouletquer et al. 2002 [126]  | TRANSPORT- STOWAWAY: Ship/boat hull fouling<br>TRANSPORT- STOWAWAY: Ship/boat ballast water                                                                                                          | Extinct                              | Extinct                              | Absent      |
| Animalia | Arthropoda | <i>Melita nitida</i> S.I. Smith in Verrill, 1873  | Temperate Northern Atlantic | 2013         | Bay of Biscay             | Gouillieux et al. 2016 [127]  | TRANSPORT- STOWAWAY: Ship/boat hull fouling<br>TRANSPORT- STOWAWAY: Ship/boat ballast water<br>TRANSPORT- HITCHHIKERS: Hitchhikers on animals (except parasites, species transported by host/vector) | Absent                               | Established                          | Absent      |
| Animalia | Arthropoda | <i>Monocorophium acherusicum</i> (Costa, 1853)    | Cryptogenic                 | 1898         | Northern Seas             | Chevreux, 1898 [128]          | TRANSPORT- STOWAWAY: Ship/boat ballast water<br>TRANSPORT- STOWAWAY: Ship/boat hull fouling                                                                                                          | Established                          | Established                          | Established |
| Animalia | Arthropoda | <i>Monocorophium sextonae</i> (Crawford, 1937)    | Cryptogenic                 | 1936         | Northern Seas             | Bertrand, 1938 [129]          | TRANSPORT- STOWAWAY: Ship/boat hull fouling<br>TRANSPORT- STOWAWAY: Ship/boat ballast water                                                                                                          | Established                          | Established                          | Established |
| Animalia | Arthropoda | <i>Monocorophium uenoi</i> (Stephensen, 1932)     | Temperate Northern Pacific  | 2007         | Western Mediterranean Sea | Gouilleux & Massé, 2019 [130] | TRANSPORT- HITCHHIKERS: Hitchhikers on animals (except parasites, species transported by host/vector)                                                                                                | Absent                               | Established                          | Absent      |
| Animalia | Arthropoda | <i>Mycicola ostreae</i> Hoshina & Sugiura, 1953   | Temperate Northern Pacific  | 1970         | Bay of Biscay             | Comps, 1972 [131]             | TRANSPORT- HITCHHIKERS: Parasites on animals (including species transported by host and vector)                                                                                                      | Absent                               | Established                          | Established |
| Animalia | Arthropoda | <i>Mytilicola intestinalis</i> Steuer, 1902       | Cryptogenic                 | 1950         | All                       | Lambert, 1951 [132]           | TRANSPORT- HITCHHIKERS: Parasites on animals (including species transported by host and vector)                                                                                                      | Established                          | Established                          | Established |
| Animalia | Arthropoda | <i>Mytilicola orientalis</i> Mori, 1935           | Temperate Northern Pacific  | 1977         | Bay of Biscay             | His, 1977 [133]               | TRANSPORT- HITCHHIKERS: Parasites on animals (including species transported by host and vector)                                                                                                      | Established                          | Established                          | Established |
| Animalia | Arthropoda | <i>Necora puber</i> (Linnaeus, 1767)              | Cryptogenic                 | Before 1987  | Unknown                   | Holthuis, 1987 [134]          | UNKNOWN                                                                                                                                                                                              | Established and considered as native | Established and considered as native | Established |
| Animalia | Arthropoda | <i>Neomysis americana</i> (S.I. Smith, 1873)      | Temperate Northern Atlantic | 2017         | Northern Seas             | Massé et al. 2018 [135]       | TRANSPORT- STOWAWAY: Ship/boat ballast water                                                                                                                                                         | Established                          | Absent                               | Absent      |
| Animalia | Arthropoda | <i>Neomysis integer</i> (Leach, 1814)             | Temperate Northern Atlantic | 1939         | Western Mediterranean Sea | Băcescu, 1941 [136]           | UNKNOWN                                                                                                                                                                                              | Native                               | Native                               | Extinct     |
| Animalia | Arthropoda | <i>Odontodactylus scyllarus</i> (Linnaeus, 1758)  | Central Indo-Pacific        | 2009         | Northern Seas             | Noël, 2011 [137]              | ESCAPE FROM CONFINEMENT: Pet/aquarium/ terrarium species (including live food for such species)                                                                                                      | One record                           | Absent                               | Absent      |
| Animalia | Arthropoda | <i>Palaemon macrodactylus</i> Rathbun, 1902       | Temperate Northern Pacific  | 1998         | Bay of Biscay             | Beguer et al. 2007 [138]      | TRANSPORT- STOWAWAY: Ship/boat ballast water                                                                                                                                                         | Casual                               | Established                          | Absent      |
| Animalia | Arthropoda | <i>Paracerceis sculpta</i> (Holmes, 1904)         | Temperate Northern Pacific  | 2014         | Western Mediterranean Sea | Marchini et al. 2015 [139]    | UNKNOWN                                                                                                                                                                                              | Absent                               | Absent                               | Established |
| Animalia | Arthropoda | <i>Paranthura japonica</i> Richardson, 1909       | Temperate Northern Pacific  | 2007         | Bay of Biscay             | Lavesque et al. 2013 [140]    | TRANSPORT- STOWAWAY: Ship/boat hull fouling<br>TRANSPORT- STOWAWAY: Ship/boat ballast water<br>ESCAPE FROM CONFINEMENT: Live food and live bait                                                      | Established                          | Established                          | Established |

|          |            |                                                                      |                             |             |                                           |                                                                                                                                                                                                                        |                                                                                                                                                                                                      |                         |                         |                         |
|----------|------------|----------------------------------------------------------------------|-----------------------------|-------------|-------------------------------------------|------------------------------------------------------------------------------------------------------------------------------------------------------------------------------------------------------------------------|------------------------------------------------------------------------------------------------------------------------------------------------------------------------------------------------------|-------------------------|-------------------------|-------------------------|
| Animalia | Arthropoda | <i>Parvocalanus crassirostris</i> (Dahl F., 1894)                    | Central Indo-Pacific        | Before 2005 | Western Mediterranean Sea                 | Razouls et al. 2005-2022 ( <a href="https://copepodes.obs-banyuls.fr/en/fichesp_subzone.s.php?sp=1090&amp;nloc=21&amp;d=o">https://copepodes.obs-banyuls.fr/en/fichesp_subzone.s.php?sp=1090&amp;nloc=21&amp;d=o</a> ) | UNKNOWN                                                                                                                                                                                              | Absent                  | Absent                  | Casual                  |
| Animalia | Arthropoda | <i>Penaeus aztecus</i> Ives, 1891                                    | Tropical Atlantic           | 2015        | Western Mediterranean Sea                 | Galil et al. 2017 [141]                                                                                                                                                                                                | TRANSPORT- STOWAWAY: Ship/boat ballast water                                                                                                                                                         | Absent                  | Absent                  | Casual                  |
| Animalia | Arthropoda | <i>Penaeus japonicus</i> Spence Bate, 1888                           | Temperate Northern Pacific  | 1969        | Western Mediterranean Sea & Bay of Biscay | Tournier, 1972 [142]                                                                                                                                                                                                   | ESCAPE FROM CONFINEMENT: Aquaculture/ mariculture                                                                                                                                                    | One record              | Casual                  | Established             |
| Animalia | Arthropoda | <i>Penaeus semisulcatus</i> De Haan, 1844                            | Central Indo-Pacific        | 2016        | Northern Seas                             | Pezy et al. 2017 [143]                                                                                                                                                                                                 | TRANSPORT- STOWAWAY: Ship/boat ballast water                                                                                                                                                         | One record              | Absent                  | Absent                  |
| Animalia | Arthropoda | <i>Percnon gibbesi</i> (H. Milne Edwards, 1853)                      | Cryptogenic                 | 2010        | Western Mediterranean Sea                 | Noël, 2015 [144]                                                                                                                                                                                                       | UNKNOWN                                                                                                                                                                                              | Absent                  | Absent                  | Invasive                |
| Animalia | Arthropoda | <i>Pseudodiptomus marinus</i> Sato, 1913                             | Temperate Northern Pacific  | 2010        | Western Mediterranean Sea & Northern Seas | Brylinski et al. 2012 ; Delpy et al. 2012 [145,146]                                                                                                                                                                    | TRANSPORT- STOWAWAY: Ship/boat ballast water                                                                                                                                                         | Established to invasive | Established to invasive | Established to invasive |
| Animalia | Arthropoda | <i>Pseudomyicola spinosus spinosus</i> (Raffaele & Monticelli, 1885) | Mediterranean Sea           | 1951        | Western Mediterranean Sea                 | Korringa & Lambert, 1951 [147]                                                                                                                                                                                         | TRANSPORT- STOWAWAY: Ship/boat ballast water<br>TRANSPORT- STOWAWAY: Ship/boat hull fouling<br>TRANSPORT- HITCHHIKERS: Parasites on animals (including species transported by host and vector)       | Casual                  | Casual                  | Casual                  |
| Animalia | Arthropoda | <i>Ptilohyale littoralis</i> (Stimpson, 1853)                        | Temperate Northern Atlantic | 1985        | Bay of Biscay                             | Arresti, 1985 in Lo Brutto, 2018 [148]                                                                                                                                                                                 | TRANSPORT- STOWAWAY: Ship/boat hull fouling<br>UNAIDED: Natural dispersal across borders of invasive alien species that have been introduced through pathways 1 to 5                                 | Established             | Established             | Absent                  |
| Animalia | Arthropoda | <i>Rhithropanopeus harrisi</i> (Gould, 1841)                         | Temperate Northern Atlantic | 1954        | Northern Seas                             | Saudray, 1956 [149]                                                                                                                                                                                                    | TRANSPORT- STOWAWAY: Ship/boat ballast water<br>TRANSPORT- STOWAWAY: Ship/boat hull fouling<br>TRANSPORT- HITCHHIKERS: Hitchhikers on animals (except parasites, species transported by host/vector) | Established             | Established             | Established             |
| Animalia | Arthropoda | <i>Sarsamphiascus tenuiremis</i> (Brady & Robertson, 1876)           | Cryptogenic                 | 2012        | Western Mediterranean Sea                 | Mascart et al. 2015 [150]                                                                                                                                                                                              | UNKNOWN                                                                                                                                                                                              | Absent                  | Absent                  | Established             |
| Animalia | Arthropoda | <i>Solidobalanus fallax</i> (Broch, 1927)                            | Mediterranean Sea           | 1976        | Northern Seas                             | Gruet et al. 2014 [151]                                                                                                                                                                                                | TRANSPORT- STOWAWAY: Ship/boat ballast water<br>TRANSPORT- STOWAWAY: Ship/boat hull fouling                                                                                                          | Established             | Established             | Native                  |
| Animalia | Arthropoda | <i>Sphaeroma walkeri</i> Stebbing, 1905                              | Temperate Northern Atlantic | 1806        | Bay of Biscay                             | Zibrowius, 1991 [152]                                                                                                                                                                                                  | TRANSPORT- STOWAWAY: Ship/boat hull fouling                                                                                                                                                          | Absent                  | Absent                  | One record              |
| Animalia | Arthropoda | <i>Stenothoe georgiana</i> Bynum & Fox, 1977                         | Temperate Northern Atlantic | 2015        | Western Mediterranean Sea                 | Ulman et al. 2017 [153]                                                                                                                                                                                                | UNKNOWN                                                                                                                                                                                              | Absent                  | Absent                  | Casual                  |
| Animalia | Arthropoda | <i>Stephos cryptospinosus</i> Zagami, Campolmi & Costanzo, 2000      | Mediterranean Sea           | 2010        | Bay of Biscay                             | Brylinski & Courcot, 2019 [154]                                                                                                                                                                                        | TRANSPORT- HITCHHIKERS: Hitchhikers on animals (except parasites, species transported by host/vector)                                                                                                | Absent                  | One record              | Native                  |
| Animalia | Arthropoda | <i>Stephos marsalensis</i> Costanzo, Campolmi & Zagami, 2000         | Mediterranean Sea           | 2014        | Bay of Biscay                             | Brylinski & Courcot, 2019 [154]                                                                                                                                                                                        | TRANSPORT- HITCHHIKERS: Hitchhikers on animals (except parasites, species transported by host/vector)                                                                                                | Absent                  | One record              | Native                  |
| Animalia | Arthropoda | <i>Synidotea laticauda</i> Benedict, 1897                            | Temperate Northern Pacific  | Before 1975 | Bay of Biscay                             | Mees & Fockede, 1993 [155]                                                                                                                                                                                             | TRANSPORT- STOWAWAY: Ship/boat ballast water<br>TRANSPORT- STOWAWAY: Ship/boat hull fouling                                                                                                          | Established             | Established             | Absent                  |

|          |            |                                                                        |                                   |      |                                               |                                   |                                                                                                                                                                                                                  |                                   |                                   |                                                            |
|----------|------------|------------------------------------------------------------------------|-----------------------------------|------|-----------------------------------------------|-----------------------------------|------------------------------------------------------------------------------------------------------------------------------------------------------------------------------------------------------------------|-----------------------------------|-----------------------------------|------------------------------------------------------------|
| Animalia | Arthropoda | <i>Telmatogeton japonicus</i><br>Tokunaga, 1933                        | Temperate<br>Northern<br>Pacific  | 2005 | Northern Seas                                 | Dewarumez et al. 2011 [84]        | TRANSPORT- STOWAWAY: Ship/boat hull<br>fouling<br>TRANSPORT- HITCHHIKERS: Hitchhikers<br>on animals (except parasites, species<br>transported by host/vector)                                                    | Established                       | Absent                            | Casual                                                     |
| Animalia | Bryozoa    | <i>Amathia verticillata</i><br>(delle Chiaje, 1822)                    | Cryptogenic                       | 1888 | Menton - Western<br>Mediterranean Sea         | Joliet, 1888 [156]                | UNKNOWN                                                                                                                                                                                                          | Absent                            | Absent                            | Established to<br>invasive but<br>with no proven<br>impact |
| Animalia | Bryozoa    | <i>Bugula neritina</i><br>(Linnaeus, 1758)                             | Cryptogenic                       | 1900 | Thau lagoon -<br>Western<br>Mediterranean Sea | Calvet, 1900 [157]                | TRANSPORT- STOWAWAY: Ship/boat hull<br>fouling<br>TRANSPORT- HITCHHIKERS: Hitchhikers<br>on animals (except parasites, species<br>transported by host/vector)                                                    | Invasive with no<br>proven impact | Invasive with no<br>proven impact | Established                                                |
| Animalia | Bryozoa    | <i>Bugulina fulva</i> (Ryland,<br>1960)                                | Cryptogenic                       | 1966 | Unknown - Western<br>Mediterranean Sea        | Prenant & Bobin, 1966 [158]       | UNKNOWN                                                                                                                                                                                                          | Established                       | Casual                            | Casual                                                     |
| Animalia | Bryozoa    | <i>Bugulina simplex</i><br>(Hincks, 1886)                              | Mediterranean<br>Sea              | 1994 | Arcachon - Bay of<br>Biscay                   | d'Hondt & Cazaux, 1994<br>[159]   | TRANSPORT- STOWAWAY: Ship/boat<br>ballast water<br>TRANSPORT- HITCHHIKERS: Hitchhikers<br>on animals (except parasites, species<br>transported by host/vector)                                                   | Established                       | Established                       | Native                                                     |
| Animalia | Bryozoa    | <i>Bugulina stolonifera</i><br>(Ryland, 1960)                          | Temperate<br>Northern<br>Atlantic | 1966 | Unknown - unknown                             | Prenant & Bobin, 1966 [158]       | TRANSPORT- STOWAWAY: Ship/boat hull<br>fouling<br>TRANSPORT- STOWAWAY: Ship/boat<br>ballast water                                                                                                                | Established                       | Established                       | Established                                                |
| Animalia | Bryozoa    | <i>Caulibugula<br/>zanzibariensis</i> (Waters,<br>1913)                | Western Indo-<br>Pacific          | 2003 | Arcachon bay - Bay<br>of Biscay               | d'Hondt & Breton, 2005 [160]      | TRANSPORT- STOWAWAY: Ship/boat hull<br>fouling                                                                                                                                                                   | Absent                            | Casual                            | Absent                                                     |
| Animalia | Bryozoa    | <i>Celleporaria brunnea</i><br>(Hincks, 1884)                          | Temperate<br>Northern<br>Pacific  | 2007 | Arcachon bay - Bay<br>of Biscay               | André et al. 2014 [161]           | TRANSPORT- STOWAWAY: Ship/boat hull<br>fouling                                                                                                                                                                   | Absent                            | Casual                            | Established                                                |
| Animalia | Bryozoa    | <i>Crisularia serrata</i><br>(Lamarck, 1816)                           | Temperate<br>Northern<br>Atlantic | 1902 | Thau lagoon -<br>Western<br>Mediterranean Sea | Calvet, 1902 [162]                | TRANSPORT- HITCHHIKERS: Hitchhikers<br>on animals (except parasites, species<br>transported by host/vector)<br>TRANSPORT- STOWAWAY: Ship/boat hull<br>fouling<br>TRANSPORT- STOWAWAY: Ship/boat<br>ballast water | Native                            | Native                            | Casual                                                     |
| Animalia | Bryozoa    | <i>Fenestrulina delicia</i><br>Winston, Hayward &<br>Craig, 2000       | Temperate<br>Northern<br>Atlantic | 2007 | Granville - Northern<br>Seas                  | De Blauwe 2008 [163]              | TRANSPORT- STOWAWAY: Ship/boat<br>ballast water<br>TRANSPORT- STOWAWAY: Ship/boat hull<br>fouling                                                                                                                | Established                       | Absent                            | Absent                                                     |
| Animalia | Bryozoa    | <i>Pacificincola perforata</i><br>(Okada & Mawatari,<br>1937)          | Temperate<br>Northern<br>Pacific  | 2001 | Bay of Biscay                                 | De Blauwe, 2006 [164]             | TRANSPORT- STOWAWAY: Ship/boat hull<br>fouling<br>TRANSPORT- STOWAWAY: Ship/boat<br>ballast water                                                                                                                | Absent                            | Casual                            | Absent                                                     |
| Animalia | Bryozoa    | <i>Schizoporella japonica</i><br>Ortmann, 1890                         | Temperate<br>Northern<br>Pacific  | 2021 | Northern Seas                                 | ICES, 2022 [68]                   | TRANSPORT- STOWAWAY: Ship/boat hull<br>fouling<br>TRANSPORT- HITCHHIKERS: Hitchhikers<br>on animals (except parasites, species<br>transported by host/vector)                                                    | Casual                            | Absent                            | Absent                                                     |
| Animalia | Bryozoa    | <i>Tricellaria inopinata</i><br>d'Hondt & Occhipinti<br>Ambroggi, 1985 | Temperate<br>Northern<br>Pacific  | 2000 | Bay of Biscay                                 | De Blauwe & Faasse, 2001<br>[165] | TRANSPORT- STOWAWAY: Ship/boat hull<br>fouling                                                                                                                                                                   | Invasive with no<br>proven impact | Invasive with no<br>proven impact | Casual                                                     |
| Animalia | Bryozoa    | <i>Victorella pavida</i><br>Saville-Kent, 1870                         | Cryptogenic                       | 1925 | Northern Seas                                 | Poisson & Remy, 1925 [166]        | TRANSPORT- STOWAWAY: Ship/boat<br>ballast water<br>TRANSPORT- STOWAWAY: Ship/boat hull<br>fouling                                                                                                                | Casual                            | Casual                            | Casual                                                     |

|          |          |                                                                         |                                   |      |                                                                                               |                                                                                                                                     |                                                                                                                                                               |             |             |             |
|----------|----------|-------------------------------------------------------------------------|-----------------------------------|------|-----------------------------------------------------------------------------------------------|-------------------------------------------------------------------------------------------------------------------------------------|---------------------------------------------------------------------------------------------------------------------------------------------------------------|-------------|-------------|-------------|
| Animalia | Bryozoa  | <i>Watersipora arcuata</i><br>Banta, 1969                               | Temperate<br>Northern<br>Pacific  | 2016 | Unknown                                                                                       | Ulman et al. 2017 [153]                                                                                                             | TRANSPORT- STOWAWAY: Ship/boat hull<br>fouling                                                                                                                | Absent      | Absent      | One record  |
| Animalia | Bryozoa  | <i>Watersipora souleorum</i><br>Vieira, Spencer Jones &<br>Taylor, 2014 | Cryptogenic                       | 1962 | Western<br>Mediterranean Sea                                                                  | Reverter-Gil & Souto, 2019<br>[167]                                                                                                 | TRANSPORT- STOWAWAY: Ship/boat hull<br>fouling                                                                                                                | Absent      | Absent      | Casual      |
| Animalia | Bryozoa  | <i>Watersipora subatra</i><br>(Ortmann, 1890)                           | Temperate<br>Northern<br>Pacific  | 1983 | Bay of Biscay                                                                                 | d'Hondt, 1984 [168]                                                                                                                 | TRANSPORT- STOWAWAY: Ship/boat hull<br>fouling<br>HITCHHIKERS: Hitchhikers on animals<br>(except parasites, species transported by<br>host/vector)            | Established | Established | Established |
| Animalia | Chordata | <i>Abudefduf vaigiensis</i><br>(Quoy & Gaimard, 1825)                   | Central Indo-<br>Pacific          | 2005 | Unknown - unknown                                                                             | GBIF<br>( <a href="https://www.gbif.org/fr/species/2398634">https://www.gbif.org/fr/species/2398634</a> )                           | TRANSPORT- STOWAWAY: Ship/boat<br>ballast water<br>CORRIDOR: Interconnected<br>waterways/basins/ seas<br>RELEASE IN NATURE: Other intentional<br>release      | Absent      | Absent      | Casual      |
| Animalia | Chordata | <i>Acipenser baerii</i> Brandt,<br>1869                                 | Temperate<br>Northern<br>Pacific  | 1999 | Gironde Estuary (Bay<br>of Biscay) - Bay of<br>Biscay                                         | Gouilletquer et al. 2002 [126]                                                                                                      | RELEASE IN NATURE: Fishery in the wild<br>(including game fishing) ESCAPE FROM<br>CONFINMENT: Aquaculture/Mariculture                                         | Casual      | Extinct     | Casual      |
| Animalia | Chordata | <i>Aplidium antillense</i><br>(Gravier, 1955)                           | Tropical<br>Atlantic              | 2004 | Le Havre - Northern<br>Seas                                                                   | Ruellet & Breton, 2012 [169]                                                                                                        | TRANSPORT- STOWAWAY: Ship/boat hull<br>fouling<br>TRANSPORT- STOWAWAY: Ship/boat<br>ballast water                                                             | One record  | Absent      | Absent      |
| Animalia | Chordata | <i>Aplidium glabrum</i><br>(Verrill, 1871)                              | Temperate<br>Northern<br>Atlantic | 2005 | Le Havre - Northern<br>Seas                                                                   | Ruellet & Breton, 2012 [169]                                                                                                        | UNKNOWN                                                                                                                                                       | Established | Established | Established |
| Animalia | Chordata | <i>Asterocarpa humilis</i><br>(Heller, 1878)                            | Central Indo-<br>Pacific          | 2005 | Camaret-sur-mer -<br>Northern Seas                                                            | Bishop et al. 2013 [170]                                                                                                            | TRANSPORT- STOWAWAY: Ship/boat hull<br>fouling<br>TRANSPORT- HITCHHIKERS: Hitchhikers<br>on animals (except parasites, species<br>transported by host/vector) | Established | Established | Absent      |
| Animalia | Chordata | <i>Beryx splendens</i> Lowe,<br>1834                                    | Across realms                     | 1943 | Unknown - Bay of<br>Biscay                                                                    | Bougis, 1945 in Wheeler,<br>1963 [171]                                                                                              | UNKNOWN                                                                                                                                                       | Absent      | Established | Casual      |
| Animalia | Chordata | <i>Botrylloides diegensis</i><br>Ritter & Forsyth, 1917                 | Temperate<br>Northern<br>Pacific  | 1999 | Unknown - Northern<br>Seas                                                                    | Breton in Bishop et al. 2015<br>[172]                                                                                               | TRANSPORT- STOWAWAY: Ship/boat hull<br>fouling<br>TRANSPORT- STOWAWAY: Ship/boat<br>ballast water                                                             | Established | Established | Established |
| Animalia | Chordata | <i>Botrylloides violaceus</i><br>Oka, 1927                              | Temperate<br>Northern<br>Pacific  | 2004 | Unknown - Northern<br>Seas                                                                    | Bishop & Lambert in Bishop<br>et al. 2015 [172]                                                                                     | TRANSPORT- STOWAWAY: Ship/boat hull<br>fouling<br>TRANSPORT- STOWAWAY: Ship/boat<br>ballast water                                                             | Established | Established | Established |
| Animalia | Chordata | <i>Chilomycterus<br/>reticulatus</i> (Linnaeus,<br>1758)                | Tropical<br>Atlantic              | 2012 | Marseille - Western<br>Mediterranean Sea                                                      | INPN<br>( <a href="https://inpn.mnhn.fr/espece/c_d_nom/533393/tab/carte">https://inpn.mnhn.fr/espece/c_d_nom/533393/tab/carte</a> ) | UNKNOWN                                                                                                                                                       | Absent      | Absent      | One record  |
| Animalia | Chordata | <i>Ciona robusta</i> Hoshino<br>& Tokioka, 1967                         | Temperate<br>Northern<br>Pacific  | 2007 | Brest, Perros-Guirec,<br>Camaret-sur-mer,<br>Concarneau - Bay of<br>Biscay & Northern<br>Seas | Nydam & Harrison, 2011<br>[173]                                                                                                     | TRANSPORT- STOWAWAY: Ship/boat hull<br>fouling<br>TRANSPORT- HITCHHIKERS: Hitchhikers<br>on animals (except parasites, species<br>transported by host/vector) | Established | Established | Established |
| Animalia | Chordata | <i>Clavelina oblonga</i><br>Herdman, 1880                               | Temperate<br>Northern<br>Atlantic | 1986 | Thau lagoon -<br>Western<br>Mediterranean Sea                                                 | Monniot et al. 1986 [174]                                                                                                           | TRANSPORT- STOWAWAY: Ship/boat hull<br>fouling                                                                                                                | Casual      | Casual      | Established |
| Animalia | Chordata | <i>Corella eumyota</i><br>Traustedt, 1882                               | Across realms                     | 2002 | Perros-Guirec -<br>Northern Seas                                                              | Lambert, 2004 [175]                                                                                                                 | TRANSPORT- HITCHHIKERS: Hitchhikers<br>on animals (except parasites, species<br>transported by host/vector)<br>TRANSPORT- STOWAWAY: Ship/boat hull<br>fouling | Established | Established | Absent      |

|          |          |                                                    |                             |             |                                           |                                                   |                                                                                                                                                                                                      |             |             |             |
|----------|----------|----------------------------------------------------|-----------------------------|-------------|-------------------------------------------|---------------------------------------------------|------------------------------------------------------------------------------------------------------------------------------------------------------------------------------------------------------|-------------|-------------|-------------|
| Animalia | Chordata | <i>Cynoscion regalis</i> (Bloch & Schneider, 1801) | Temperate Northern Atlantic | 2021        | Bay of Biscay - Bay of Biscay             | ICES, 2022; Iglesias et al. in prep [68]          | UNKNOWN                                                                                                                                                                                              | Absent      | One record  | Absent      |
| Animalia | Chordata | <i>Cystodytes philippinensis</i> Herdman, 1886     | Cryptogenic                 | Before 1927 | Unknown - unknown                         | Harant, 1927 [176]                                | UNKNOWN                                                                                                                                                                                              | Absent      | Absent      | One record  |
| Animalia | Chordata | <i>Dicologlossa hexopthalma</i> (Bennett, 1831)    | Cryptogenic                 | 2000        | Unknown - Western Mediterranean Sea       | Quignard, 2011 [177]                              | UNKNOWN                                                                                                                                                                                              | Absent      | Absent      | Casual      |
| Animalia | Chordata | <i>Didemnum pseudovexillum</i> Turon & Viard, 2020 | Cryptogenic                 | 2015        | Roscoff - Northern Seas                   | Turon et al. 2020 [178]                           | UNKNOWN                                                                                                                                                                                              | Established | Absent      | Absent      |
| Animalia | Chordata | <i>Didemnum vexillum</i> Kott, 2002                | Temperate Northern Pacific  | 1968        | Glénan Islands - Bay of Biscay            | Lafargue, 1968 [179]                              | TRANSPORT- STOWAWAY: Ship/boat hull fouling<br>TRANSPORT- STOWAWAY: Ship/boat ballast water<br>TRANSPORT- HITCHHIKERS: Hitchhikers on animals (except parasites, species transported by host/vector) | Established | Established | Established |
| Animalia | Chordata | <i>Diplosoma listerianum</i> (Milne Edwards, 1841) | Cryptogenic                 | 1905        | St-Malo - Northern Seas                   | Baffreau et al. 2018 [41]                         | TRANSPORT- STOWAWAY: Ship/boat hull fouling                                                                                                                                                          | Established | Established | Established |
| Animalia | Chordata | <i>Ecteinascidia styeloides</i> (Traustedt, 1882)  | Tropical Atlantic           | 1983        | Unknown - Western Mediterranean Sea       | Monniot & Monniot, 1987 [180]                     | TRANSPORT- STOWAWAY: Ship/boat ballast water<br>TRANSPORT- STOWAWAY: Ship/boat hull fouling                                                                                                          | Absent      | Absent      | Established |
| Animalia | Chordata | <i>Epinephelus merra</i> Bloch, 1793               | Central Indo-Pacific        | 2004        | Embiez Island - Western Mediterranean Sea | Lelong, 2005 [181]                                | UNAIDED: Natural dispersal across borders of invasive alien species that have been introduced through pathways 1 to 5                                                                                | Absent      | Absent      | One record  |
| Animalia | Chordata | <i>Fistularia commersonii</i> Rüppell, 1838        | Central Indo-Pacific        | 2007        | Porquerolles - Western Mediterranean Sea  | Bodilis et al. 2011 [182]                         | CORRIDOR: Interconnected waterways/basins/ seas                                                                                                                                                      | Absent      | Absent      | Established |
| Animalia | Chordata | <i>Fistularia petimba</i> Lacepède, 1803           | Central Indo-Pacific        | 2018        | Bay of Biscay                             | Francour comm. pers in Iglesias et al. 2020 [183] | UNKNOWN                                                                                                                                                                                              | Absent      | One record  | Absent      |
| Animalia | Chordata | <i>Holocentrus adscensionis</i> (Osbeck, 1765)     | Tropical Atlantic           | 2019        | Western Mediterranean Sea                 | Iglesias et al. 2021 [184]                        | TRANSPORT- STOWAWAY: Ship/boat ballast water<br>ESCAPE FROM CONFINEMENT: Pet/aquarium/ terrarium species (including live food for such species)                                                      | Absent      | Absent      | One record  |
| Animalia | Chordata | <i>Microcosmus anchylodeirus</i> Traustedt, 1883   | Temperate Northern Pacific  | 1980        | Western Mediterranean Sea                 | Monniot, 2016 [185]                               | UNKNOWN                                                                                                                                                                                              | Absent      | Absent      | Casual      |
| Animalia | Chordata | <i>Microcosmus squamiger</i> Michaelsen, 1927      | Temperate Australasia       | 1979        | Western Mediterranean Sea                 | Monniot, 1981 [186]                               | TRANSPORT- STOWAWAY: Ship/boat hull fouling<br>TRANSPORT- STOWAWAY: Ship/boat ballast water                                                                                                          | Absent      | One record  | Established |
| Animalia | Chordata | <i>Molgula manhattensis</i> (De Kay, 1843)         | Cryptogenic                 | 1826        | Northern Seas                             | Breton, 2014 [187]                                | TRANSPORT- STOWAWAY: Ship/boat hull fouling                                                                                                                                                          | Casual      | Casual      | Established |
| Animalia | Chordata | <i>Oncorhynchus gorbusha</i> (Walbaum, 1792)       | Temperate Northern Pacific  | 2021        | Northern Seas                             | NASCO 2022                                        | RELEASE IN NATURE: Fishery in the wild (including game fishing)                                                                                                                                      | Established | Absent      | Absent      |
| Animalia | Chordata | <i>Oncorhynchus mykiss</i> (Walbaum, 1792)         | Temperate Northern Pacific  | 1984        | Northern Seas                             | Le Mao, 1985 in Le Mao 2009 [188]                 | RELEASE IN NATURE: Fishery in the wild (including game fishing)                                                                                                                                      | Established | Established | Established |
| Animalia | Chordata | <i>Paracanthurus hepatus</i> (Linnaeus, 1766)      | Across realms               | 2021        | Western Mediterranean Sea                 | Pergent-Martini & Provost 2022 [189]              | ESCAPE FROM CONFINEMENT: Pet/aquarium/ terrarium species (including live food for such species)                                                                                                      | Absent      | Absent      | One record  |
| Animalia | Chordata | <i>Perophora japonica</i> Oka, 1927                | Temperate Northern Pacific  | 1982        | Northern Seas                             | Monniot & Monniot, 1985 [190]                     | TRANSPORT- STOWAWAY: Ship/boat hull fouling                                                                                                                                                          | Established | Established | Casual      |

|          |          |                                                          |                            |              |                                     |                                                                                                  |                                                                                                                                                                                                      |                         |                         |             |
|----------|----------|----------------------------------------------------------|----------------------------|--------------|-------------------------------------|--------------------------------------------------------------------------------------------------|------------------------------------------------------------------------------------------------------------------------------------------------------------------------------------------------------|-------------------------|-------------------------|-------------|
| Animalia | Chordata | <i>Perophora viridis</i> Verrill, 1871                   | Cryptogenic                | Before 1983  | Unknown                             | Monniot, 1983 [191]                                                                              | UNKNOWN                                                                                                                                                                                              | Absent                  | Absent                  | Casual      |
| Animalia | Chordata | <i>Phallusia mamillata</i> (Cuvier, 1815)                | Cryptogenic                | 1923         | Northern Seas                       | Lozach & Dauvin, 2012 [192]                                                                      | TRANSPORT- STOWAWAY: Ship/boat hull fouling                                                                                                                                                          | Established             | Established             | Established |
| Animalia | Chordata | <i>Polyandrocarpa zorritensis</i> (Van Name, 1931)       | Temperate Southern Africa  | Unknown      | Unknown                             | Unknown                                                                                          | TRANSPORT- STOWAWAY: Ship/boat hull fouling<br>TRANSPORT- STOWAWAY: Ship/boat ballast water<br>TRANSPORT- HITCHHIKERS: Hitchhikers on animals (except parasites, species transported by host/vector) | Absent                  | Absent                  | Established |
| Animalia | Chordata | <i>Psenes pellucidus</i> Lütken, 1880                    | Across realms              | 1995         | Western Mediterranean Sea           | Quignard & Tomasini, 2000 [193]                                                                  | UNKNOWN                                                                                                                                                                                              | Absent                  | Absent                  | Casual      |
| Animalia | Chordata | <i>Siganus luridus</i> (Rüppell, 1829)                   | Western Indo-Pacific       | 2008         | Western Mediterranean Sea           | Daniel et al. 2009 [194]                                                                         | CORRIDOR: Interconnected waterways/basins/ seas<br>UNAIDED: Natural dispersal across borders of invasive alien species that have been introduced through pathways 1 to 5                             | Absent                  | Absent                  | Casual      |
| Animalia | Chordata | <i>Siganus rivulatus</i> Forsskål & Niebuhr, 1775        | Western Indo-Pacific       | 2010         | Western Mediterranean Sea           | ICES, 2011[195] ; Otero et al. 2013 [196]                                                        | CORRIDOR: Interconnected waterways/basins/ seas<br>UNAIDED: Natural dispersal across borders of invasive alien species that have been introduced through pathways 1 to 5                             | Absent                  | Absent                  | Casual      |
| Animalia | Chordata | <i>Sphoeroides pachygaster</i> (Müller & Troschel, 1848) | Hybridization              | 1885         | Bay of Biscay                       | Quéro et al. 1991 [197]                                                                          | TRANSPORT- STOWAWAY: Ship/boat ballast water<br>TRANSPORT- STOWAWAY: Ship/boat hull fouling                                                                                                          | Absent                  | Casual                  | Casual      |
| Animalia | Chordata | <i>Stephanolepis diaspros</i> Fraser-Brunner, 1940       | Western Indo-Pacific       | 2004         | Western Mediterranean Sea           | MedMIS (IUCN)                                                                                    | CORRIDOR: Interconnected waterways/basins/ seas                                                                                                                                                      | Absent                  | Absent                  | One record  |
| Animalia | Chordata | <i>Styela canopus</i> (Savigny, 1816)                    | Western Indo-Pacific       | 2019         | Western Mediterranean Sea           | Tempesti et al. 2022 [80]                                                                        | UNKNOWN                                                                                                                                                                                              | Absent                  | Absent                  | One record  |
| Animalia | Chordata | <i>Styela clava</i> Herdman, 1881                        | Temperate Northern Pacific | 1968         | Northern Seas                       | Monniot, 1970 [198]                                                                              | TRANSPORT- STOWAWAY: Ship/boat hull fouling<br>TRANSPORT- HITCHHIKERS: Hitchhikers on animals (except parasites, species transported by host/vector)                                                 | Established to invasive | Established to invasive | Established |
| Animalia | Chordata | <i>Styela plicata</i> (Lesueur, 1823)                    | Temperate Northern Pacific | 1950         | Western Mediterranean Sea           | Pérès, 1952 [92]                                                                                 | TRANSPORT- STOWAWAY: Ship/boat hull fouling                                                                                                                                                          | Absent                  | Established             | Established |
| Animalia | Chordata | <i>Synanceia verrucosa</i> Bloch & Schneider, 1801       | Across realms              | 2017         | Western Mediterranean Sea           | GBIF ( <a href="https://www.gbif.org/species/5201174">https://www.gbif.org/species/5201174</a> ) | CORRIDOR: Interconnected waterways/basins/ seas                                                                                                                                                      | Absent                  | Absent                  | One record  |
| Animalia | Chordata | <i>Trididemnum savignii</i> (Herdman, 1886)              | Cryptogenic                | 1970         | Western Mediterranean Sea           | Lafargue, 1972 [199]                                                                             | UNKNOWN                                                                                                                                                                                              | Absent                  | Absent                  | Casual      |
| Animalia | Cnidaria | <i>Amphogona pusilla</i> Hartlaub, 1909                  | Cryptogenic                | 1964         | Unknown - unknown                   | MAMIAS                                                                                           | UNKNOWN                                                                                                                                                                                              | Absent                  | Absent                  | Casual      |
| Animalia | Cnidaria | <i>Arctapodema australis</i> (Vanhöffen, 1912)           | Across realms              | 1994         | Unknown - Western Mediterranean Sea | Gili, 1998 [200]                                                                                 | UNKNOWN                                                                                                                                                                                              | Absent                  | Absent                  | One record  |
| Animalia | Cnidaria | <i>Aurelia coerulea</i> von Lendenfeld, 1884             | Temperate Northern Pacific | 2002         | Unknown - unknown                   | Schroth et al. 2002 [201] in Scorrano et al. 2016 [202]                                          | UNKNOWN                                                                                                                                                                                              | Absent                  | Absent                  | One record  |
| Animalia | Cnidaria | <i>Aurelia solida</i> Browne, 1905                       | Western Indo-Pacific       | Before 2000  | Cannes - Western Mediterranean Sea  | Schroth et al. 2002 [201]                                                                        | UNKNOWN                                                                                                                                                                                              | Absent                  | Absent                  | One record  |
| Animalia | Cnidaria | <i>Blackfordia virginica</i> Mayer, 1910                 | Black & Caspian Seas       | 1971         | Loire Estuary - Bay of Biscay       | Denayer, 1973 [203]                                                                              | TRANSPORT- STOWAWAY: Ship/boat ballast water                                                                                                                                                         | Absent                  | Established             | Absent      |
| Animalia | Cnidaria | <i>Calypsothrix cerulea</i> Clarke, 1882                 | Cryptogenic                | in the 1950s | Unknown - Northern Seas             | Gouletquer, 2016 [100]                                                                           | UNKNOWN                                                                                                                                                                                              | Casual                  | Absent                  | Casual      |
| Animalia | Cnidaria | <i>Cirrhlovenia tetranema</i> Kramp, 1959                | Cryptogenic                | 1963         | Unknown - unknown                   | Goy, 1972 [204]                                                                                  | UNKNOWN                                                                                                                                                                                              | Absent                  | Absent                  | Casual      |

|          |               |                                                    |                             |         |                                                  |                                                                                                                                  |                                                                                                                                                                                           |             |             |             |
|----------|---------------|----------------------------------------------------|-----------------------------|---------|--------------------------------------------------|----------------------------------------------------------------------------------------------------------------------------------|-------------------------------------------------------------------------------------------------------------------------------------------------------------------------------------------|-------------|-------------|-------------|
| Animalia | Cnidaria      | <i>Clytia mccradyi</i> (Brooks, 1888)              | Central Indo-Pacific        | 1950    | Banyuls-sur-mer - Western Mediterranean Sea      | INPN ( <a href="https://inpn.mnhn.fr/espece/c_d_nom/924641/tab/carte">https://inpn.mnhn.fr/espece/c_d_nom/924641/tab/carte</a> ) | UNKNOWN                                                                                                                                                                                   | Absent      | Absent      | Casual      |
| Animalia | Cnidaria      | <i>Clytia linearis</i> (Thorneley, 1900)           | Tropical Atlantic           | 1949    | Villefranche-sur-mer - Western Mediterranean Sea | Picard, 1950 [205]                                                                                                               | CORRIDOR: Interconnected waterways/basins/ seas                                                                                                                                           | Absent      | Absent      | Casual      |
| Animalia | Cnidaria      | <i>Cordylophora caspia</i> (Pallas, 1771)          | Black & Caspian Seas        | 1898    | Loire estuary - Bay of Biscay                    | Ferrière, 1901 [206]                                                                                                             | TRANSPORT- STOWAWAY: Ship/boat hull fouling<br>TRANSPORT- STOWAWAY: Ship/boat ballast water                                                                                               | Established | Established | Absent      |
| Animalia | Cnidaria      | <i>Coryne eximia</i> Allman, 1859                  | Cryptogenic                 | 1963    | Unknown                                          | Goy, 1972 [204]                                                                                                                  | UNKNOWN                                                                                                                                                                                   | Established | Established | Established |
| Animalia | Cnidaria      | <i>Diadumene cincta</i> Stephenson, 1925           | Cryptogenic                 | 1925    | Greater North Sea - Northern Seas                | Stephenson, 1925 [207]                                                                                                           | TRANSPORT- STOWAWAY: Ship/boat hull fouling<br>TRANSPORT- STOWAWAY: Ship/boat ballast water<br>HITCHHIKERS: Hitchhikers on animals (except parasites, species transported by host/vector) | Established | Established | Absent      |
| Animalia | Cnidaria      | <i>Diadumene lineata</i> (Verrill, 1869)           | Temperate Northern Pacific  | 1890'   | Unknown - Bay of Biscay                          | Gouletquer et al. 2002 [126]                                                                                                     | TRANSPORT- HITCHHIKERS: Hitchhikers on animals (except parasites, species transported by host/vector)<br>TRANSPORT- STOWAWAY: Ship/boat hull fouling                                      | Established | Established | Established |
| Animalia | Cnidaria      | <i>Eirene viridula</i> (Péron & Lesueur, 1810)     | Cryptogenic                 | Unknown | Unknown - unknown                                | Unknown                                                                                                                          | UNKNOWN                                                                                                                                                                                   | Established | Absent      | Established |
| Animalia | Cnidaria      | <i>Eucheilota paradoxa</i> Mayer, 1900             | Temperate Northern Atlantic | 1977    | Villefranche-sur-mer - Western Mediterranean Sea | Carré & Carré, 1990 [208]                                                                                                        | TRANSPORT- STOWAWAY: Ship/boat ballast water<br>TRANSPORT- STOWAWAY: Ship/boat hull fouling                                                                                               | Absent      | Absent      | Casual      |
| Animalia | Cnidaria      | <i>Eudendrium carneum</i> Clarke, 1882             | Temperate Northern Atlantic | 1950    | Ajaccio - Western Mediterranean Sea              | Schuchert, 2008 [209]                                                                                                            | UNKNOWN                                                                                                                                                                                   | Absent      | Absent      | One record  |
| Animalia | Cnidaria      | <i>Exaiptasia diaphana</i> (Rapp, 1829)            | Temperate Northern Pacific  | 1974    | Le Croisic & Bourgneuf Bay - Bay of Biscay       | Gruet et al, 1976 [115]                                                                                                          | TRANSPORT- HITCHHIKERS: Hitchhikers on animals (except parasites, species transported by host/vector)                                                                                     | Absent      | Absent      | Established |
| Animalia | Cnidaria      | <i>Gonionemus vertens</i> A. Agassiz, 1862         | Temperate Northern Pacific  | 1929    | Northern Seas                                    | Teissier, 1932 [210]                                                                                                             | TRANSPORT- STOWAWAY: Ship/boat ballast water<br>TRANSPORT- STOWAWAY: Ship/boat hull fouling                                                                                               | Established | Established | Established |
| Animalia | Cnidaria      | <i>Lovenella assimilis</i> (Browne, 1905)          | Central Indo-Pacific        | 2007    | Northern Seas                                    | Brylinski et al. 2016 [211]                                                                                                      | TRANSPORT- STOWAWAY: Ship/boat hull fouling<br>TRANSPORT- STOWAWAY: Ship/boat ballast water                                                                                               | Casual      | Absent      | Absent      |
| Animalia | Cnidaria      | <i>Maeotias marginata</i> (Modeer, 1791)           | Black Sea                   | 1971    | Bay of Biscay                                    | Denayer, 1973 [203]                                                                                                              | TRANSPORT- STOWAWAY: Ship/boat ballast water                                                                                                                                              | Absent      | Established | Absent      |
| Animalia | Cnidaria      | <i>Nemopsis bachei</i> L. Agassiz, 1849            | Temperate Northern Atlantic | 1953    | Bay of Biscay                                    | Tiffon, 1956 [212]                                                                                                               | TRANSPORT- STOWAWAY: Ship/boat ballast water                                                                                                                                              | Established | Established | Absent      |
| Animalia | Cnidaria      | <i>Oculina patagonica</i> de Angelis D'Ossat, 1908 | Tropical Atlantic           | 1972    | Western Mediterranean Sea                        | Zibrowius, 1974 [213]                                                                                                            | RELEASE IN NATURE - Other intentional release                                                                                                                                             | Absent      | Absent      | One record  |
| Animalia | Cnidaria      | <i>Oulastrea crispata</i> (Lamarck, 1816)          | Temperate Northern Pacific  | 2012    | Western Mediterranean Sea                        | Hoeksema & Ocana Vicente, 2014 [214]                                                                                             | TRANSPORT- STOWAWAY: Ship/boat hull fouling                                                                                                                                               | Absent      | Absent      | One record  |
| Animalia | Ctenophora    | <i>Mnemiopsis leidyi</i> A. Agassiz, 1865          | Temperate Northern Atlantic | 2005    | Western Mediterranean Sea & Northern Seas        | Delpy et al. 2012 [146]; Antajan et al. 2014 [215]                                                                               | TRANSPORT- STOWAWAY: Ship/boat ballast water                                                                                                                                              | Established | Established | Established |
| Animalia | Echinodermata | <i>Acanthaster planci</i> (Linnaeus, 1758)         | Western Indo-Pacific        | 2006    | Banyuls-sur-mer - Western Mediterranean Sea      | INPN ( <a href="https://inpn.mnhn.fr/espece/c_d_nom/444461/tab/carte">https://inpn.mnhn.fr/espece/c_d_nom/444461/tab/carte</a> ) | TRANSPORT- STOWAWAY: Ship/boat ballast water                                                                                                                                              | Absent      | Absent      | Casual      |

|          |          |                                                              |                                   |                |                                                                               |                                                                                                                                                                                                                                                                                    |                                                                                                                                                                                |                            |                                       |             |
|----------|----------|--------------------------------------------------------------|-----------------------------------|----------------|-------------------------------------------------------------------------------|------------------------------------------------------------------------------------------------------------------------------------------------------------------------------------------------------------------------------------------------------------------------------------|--------------------------------------------------------------------------------------------------------------------------------------------------------------------------------|----------------------------|---------------------------------------|-------------|
| Animalia | Mollusca | <i>Anomia chinensis</i><br>Philippi, 1849                    | Temperate<br>Northern<br>Pacific  | 1973-<br>1974  | Bay of Bourgneuf -<br>Bay of Biscay                                           | Gruet et al. 1976 [115]                                                                                                                                                                                                                                                            | TRANSPORT- HITCHHIKERS: Hitchhikers<br>on animals (except parasites, species<br>transported by host/vector)                                                                    | Absent                     | Extinct                               | Absent      |
| Animalia | Mollusca | <i>Aplysia dactylomela</i><br>Rang, 1828                     | Cryptogenic                       | 2016           | Monaco - Western<br>Mediterranean Sea                                         | Karachle et al. 2016 [216]                                                                                                                                                                                                                                                         | UNKNOWN                                                                                                                                                                        | Absent                     | Absent                                | Casual      |
| Animalia | Mollusca | <i>Arcuatula senhousia</i><br>(Benson, 1842)                 | Temperate<br>Northern<br>Pacific  | 1982           | Thau lagoon -<br>Western<br>Mediterranean Sea                                 | Hoenselaar & Hoenselaar,<br>1989 [217]                                                                                                                                                                                                                                             | TRANSPORT- HITCHHIKERS: Hitchhikers<br>on animals (except parasites, species<br>transported by host/vector)                                                                    | Casual                     | Established to<br>invasive            | Established |
| Animalia | Mollusca | <i>Biuve fulvipunctata</i><br>(Baba, 1938)                   | Temperate<br>Northern<br>Pacific  | 2014           | unknown - Western<br>Mediterranean Sea                                        | Citizen sciences: Horst, 2015                                                                                                                                                                                                                                                      | UNKNOWN                                                                                                                                                                        | Absent                     | Absent                                | Casual      |
| Animalia | Mollusca | <i>Bursatella leachii</i><br>Blainville, 1817                | Across realms                     | 2012           | Var - Western<br>Mediterranean Sea                                            | Citizen Sciences: Riondy et al.<br>2021 (RIONDY Benoit,<br>NIETUPSKI Marlène,<br>SITTLER Alain-Pierre in :<br>DORIS, 08/01/2021 :<br>Bursatella leachii de<br>Blainville, 1817,<br><a href="https://doris.ffessm.fr/ref/specie/2753">https://doris.ffessm.fr/ref/specie/2753</a> ) | UNKNOWN                                                                                                                                                                        | Absent                     | Absent                                | Established |
| Animalia | Mollusca | <i>Cerithium scabridum</i><br>Philippi, 1848                 | Western Indo-<br>Pacific          | 2020           | Ajaccio - Western<br>Mediterranean Sea                                        | Citizen sciences (BioObs):<br><a href="https://bioobs.fr/fiche-espece/?id_espece=3613">https://bioobs.fr/fiche-espece/?id_espece=3613</a>                                                                                                                                          | CORRIDOR: Interconnected<br>waterways/basins/ seas                                                                                                                             | Absent                     | Absent                                | Established |
| Animalia | Mollusca | <i>Chromodoris quadricolor</i> (Rüppell &<br>Leuckart, 1830) | Western Indo-<br>Pacific          | Before<br>2008 | Corsica - Western<br>Mediterranean Sea                                        | Vicente 2008 [218]                                                                                                                                                                                                                                                                 | CORRIDOR: Interconnected<br>waterways/basins/ seas<br>TRANSPORT- STOWAWAY: Ship/boat hull<br>fouling<br>TRANSPORT- STOWAWAY: Ship/boat<br>ballast water                        | Absent                     | Absent                                | Established |
| Animalia | Mollusca | <i>Corambe obscura</i> (A. E.<br>Verrill, 1870)              | Temperate<br>Northern<br>Atlantic | 1973           | Fouras - Bay of<br>Biscay                                                     | Bouchet & Tardy, 1976 [219]                                                                                                                                                                                                                                                        | TRANSPORT- HITCHHIKERS: Hitchhikers<br>on animals (except parasites, species<br>transported by host/vector)<br>TRANSPORT- STOWAWAY: Ship/boat hull<br>fouling                  | Absent                     | Casual                                | Absent      |
| Animalia | Mollusca | <i>Crassostrea rhizophorae</i><br>(Guilding, 1828)           | Tropical<br>Atlantic              | 1976           | Gironde estuary & La<br>Tremblade - Bay of<br>Biscay                          | Maurin & Gras, 1979 [220]                                                                                                                                                                                                                                                          | RELEASE IN NATURE: Fishery in the wild<br>(including game fishing)                                                                                                             | Absent                     | Extinct                               | Absent      |
| Animalia | Mollusca | <i>Crassostrea virginica</i><br>(Gmelin, 1791)               | Temperate<br>Northern<br>Atlantic | 1861-<br>1863  | Arcachon Bay and St-<br>Vaast-la-Hougue -<br>Bay of Biscay &<br>Northern Seas | Fischer, 1865 [221]                                                                                                                                                                                                                                                                | RELEASE IN NATURE: Fishery in the wild<br>(including game fishing)                                                                                                             | Extinct                    | Extinct                               | Absent      |
| Animalia | Mollusca | <i>Crepidula fornicata</i><br>(Linnaeus, 1758)               | Temperate<br>Northern<br>Atlantic | 1934           | Auray - Bay of Biscay                                                         | Canu, 1934 [222]                                                                                                                                                                                                                                                                   | TRANSPORT- STOWAWAY: Ship/boat hull<br>fouling                                                                                                                                 | Invasive                   | Established to<br>invasive            | Established |
| Animalia | Mollusca | <i>Cumanotus beaumonti</i><br>(Eliot, 1906)                  | Cryptogenic                       | 2010           | Cagnes - Western<br>Mediterranean Sea                                         | Citizen sciences: Horst, 2010                                                                                                                                                                                                                                                      | UNKNOWN                                                                                                                                                                        | Absent                     | Casual and<br>considered as<br>native | Casual      |
| Animalia | Mollusca | <i>Ensis leei</i> M. Huber,<br>2015                          | Temperate<br>Northern<br>Atlantic | 1991           | Dunkerque - Northern<br>Seas                                                  | Luczak et al. 1993 [223]                                                                                                                                                                                                                                                           | UNAIDED: Natural dispersal across borders of<br>invasive alien species that have been<br>introduced through pathways 1 to 5<br>TRANSPORT- STOWAWAY: Ship/boat<br>ballast water | Established to<br>invasive | Casual                                | Absent      |
| Animalia | Mollusca | <i>Haloo japonica</i> (Pilsbry,<br>1895)                     | Temperate<br>Northern<br>Pacific  | 2003           | Northern Seas                                                                 | Hanson et al. 2013 [224]                                                                                                                                                                                                                                                           | UNKNOWN                                                                                                                                                                        | Established                | Absent                                | Established |
| Animalia | Mollusca | <i>Hexaplex trunculus</i><br>(Linnaeus, 1758)                | Mediterranean<br>Sea              | 1996           | Bay of Biscay                                                                 | Merle & Filippozzi, 2005<br>[225]                                                                                                                                                                                                                                                  | TRANSPORT- HITCHHIKERS: Hitchhikers<br>on animals (except parasites, species<br>transported by host/vector)<br>TRANSPORT- STOWAWAY: Organic                                    | Established                | Absent                                | Native      |

|          |          |                                                          |                                   |                               |                                        |                                            |                                                                                                                                                                                                                  |             |             |             |
|----------|----------|----------------------------------------------------------|-----------------------------------|-------------------------------|----------------------------------------|--------------------------------------------|------------------------------------------------------------------------------------------------------------------------------------------------------------------------------------------------------------------|-------------|-------------|-------------|
|          |          |                                                          |                                   |                               |                                        |                                            | packing material, in particular wood packaging<br>UNAIDED: Natural dispersal across borders of<br>invasive alien species that have been<br>introduced through pathways 1 to 5                                    |             |             |             |
| Animalia | Mollusca | <i>Lamprohaminoea ovalis</i><br>(Pease, 1868)            | Eastern Indo-<br>Pacific          | 2021                          | Western<br>Mediterranean Sea           | Pergent-Martini et Provost<br>2022 [189]   | UNKNOWN                                                                                                                                                                                                          | Absent      | Absent      | Casual      |
| Animalia | Mollusca | <i>Magallana angulata</i><br>(Lamarck, 1819)             | Temperate<br>Northern<br>Pacific  | 1866                          | Bay of Biscay                          | Lafont, 1868 [226]; Fischer,<br>1873 [227] | TRANSPORT- STOWAWAY: Ship/boat hull<br>fouling<br>TRANSPORT- STOWAWAY: Ship/boat<br>ballast water<br>TRANSPORT- HITCHHIKERS: Hitchhikers<br>on animals (except parasites, species<br>transported by host/vector) | Casual      | Extinct     | Casual      |
| Animalia | Mollusca | <i>Magallana gigas</i><br>(Thunberg, 1793)               | Temperate<br>Northern<br>Pacific  | 1956                          | Marennes-Oléron Bay<br>- Bay of Biscay | Trochon, 1957 [228]                        | RELEASE IN NATURE: Fishery in the wild<br>(including game fishing)<br>ESCAPE FROM CONFINEMENT:<br>Aquaculture/ mariculture                                                                                       | Invasive    | Invasive    | Invasive    |
| Animalia | Mollusca | <i>Magallana rivularis</i><br>(Gould, 1861)              | Temperate<br>Northern<br>Pacific  | 1994                          | Bay of Biscay                          | Cochennec et al. 1998 [229]                | RELEASE IN NATURE: Fishery in the wild<br>(including game fishing)                                                                                                                                               | Absent      | Extinct     | Absent      |
| Animalia | Mollusca | <i>Magallana sikamea</i><br>(Amemiya, 1928)              | Temperate<br>Northern<br>Pacific  | 1994                          | Bay of Biscay                          | Boudry et al. 1994 [230]                   | RELEASE IN NATURE: Fishery in the wild<br>(including game fishing)                                                                                                                                               | Absent      | Extinct     | Absent      |
| Animalia | Mollusca | <i>Mercenaria mercenaria</i><br>(Linnaeus, 1758)         | Temperate<br>Northern<br>Atlantic | 1861-<br>1863                 | Bay of Biscay                          | Fischer, 1865 [221]                        | RELEASE IN NATURE: Fishery in the wild<br>(including game fishing)                                                                                                                                               | Established | Established | Established |
| Animalia | Mollusca | <i>Mizuhopecten yessoensis</i><br>(Jay, 1857)            | Temperate<br>Northern<br>Pacific  | 1988                          | Northern Seas                          | Cochard et al. 1991 [231]                  | RELEASE IN NATURE:                                                                                                                                                                                               | Absent      | Extinct     | Absent      |
| Animalia | Mollusca | <i>Mya arenaria</i> Linnaeus,<br>1758                    | Temperate<br>Northern<br>Atlantic | 13th and<br>17th<br>centuries | Unknown                                | Stora, 1976 [232]                          | TRANSPORT- HITCHHIKERS: Hitchhikers<br>on animals (except parasites, species<br>transported by host/vector)<br>TRANSPORT- STOWAWAY: Ship/boat hull<br>fouling                                                    | Established | Established | Casual      |
| Animalia | Mollusca | <i>Mytilopsis leucophaeata</i><br>(Conrad, 1831)         | Tropical<br>Atlantic              | 1898                          | Ouistrehan-Caen -<br>Northern Seas     | Baffreau et al. 2018 [41]                  | TRANSPORT- STOWAWAY: Ship/boat hull<br>fouling<br>TRANSPORT- STOWAWAY: Ship/boat<br>ballast water                                                                                                                | Established | Casual      | Established |
| Animalia | Mollusca | <i>Ocenebrellus inornatus</i><br>(Récluz, 1851)          | Temperate<br>Northern<br>Pacific  | 1994                          | Bay of Biscay                          | Sauriau & Pigeot, 2010 [233]               | TRANSPORT- HITCHHIKERS: Hitchhikers<br>on animals (except parasites, species<br>transported by host/vector)                                                                                                      | Established | Established | Absent      |
| Animalia | Mollusca | <i>Ostrea angasi</i> G.B.<br>Sowerby II, 1871            | Temperate<br>Australasia          | 1985                          | Bay of Biscay                          | Bougrier et al. 1986 [234]                 | RELEASE IN NATURE: Fishery in the wild<br>(including game fishing)                                                                                                                                               | Absent      | Extinct     | Absent      |
| Animalia | Mollusca | <i>Ostrea chilensis</i> Küster,<br>1844                  | Temperate<br>South America        | 1981                          | Bay of Biscay                          | Grizel et al. 1982 [235]                   | RELEASE IN NATURE: Fishery in the wild<br>(including game fishing)                                                                                                                                               | Absent      | Extinct     | Absent      |
| Animalia | Mollusca | <i>Ostrea puelchana</i><br>d'Orbigny, 1842               | Tropical<br>Atlantic              | 1989                          | Bay of Biscay &<br>Northern Seas       | Pascual et al. 1991 [236]                  | RELEASE IN NATURE: Fishery in the wild<br>(including game fishing)                                                                                                                                               | Extinct     | Extinct     | Extinct     |
| Animalia | Mollusca | <i>Petricolaria<br/>pholadiformis</i> (Lamarck,<br>1818) | Temperate<br>Northern<br>Atlantic | 1992                          | Northern Seas                          | Dewarumez et al. 2011 [84]                 | TRANSPORT- HITCHHIKERS: Hitchhikers<br>on animals (except parasites, species<br>transported by host/vector)<br>TRANSPORT- STOWAWAY: Ship/boat<br>ballast water                                                   | Established | Casual      | Absent      |
| Animalia | Mollusca | <i>Pinctada radiata</i> (Leach,<br>1814)                 | Central Indo-<br>Pacific          | 1979                          | Western<br>Mediterranean Sea           | Zibrowius, 1979 [237]                      | TRANSPORT- STOWAWAY: Ship/boat<br>ballast water                                                                                                                                                                  | Absent      | Absent      | Casual      |
| Animalia | Mollusca | <i>Polycera hedgpethi</i> Er.<br>Marcus, 1964            | Temperate<br>Northern<br>Pacific  | 2003                          | Western<br>Mediterranean Sea           | Citizen Sciences:<br>Poddubetskaia, 2003   | TRANSPORT- STOWAWAY: Ship/boat<br>ballast water                                                                                                                                                                  | Absent      | Casual      | Established |

|          |                 |                                                                        |                             |              |                           |                                                                                                                 |                                                                                                                                                                                                      |                                |                                |             |
|----------|-----------------|------------------------------------------------------------------------|-----------------------------|--------------|---------------------------|-----------------------------------------------------------------------------------------------------------------|------------------------------------------------------------------------------------------------------------------------------------------------------------------------------------------------------|--------------------------------|--------------------------------|-------------|
| Animalia | Mollusca        | <i>Polycerella emertoni</i> A. E. Verrill, 1880                        | Temperate Northern Atlantic | 2018         | Western Mediterranean Sea | Citizen sciences: <a href="https://opisthobranquis.org/en/guia/333">https://opisthobranquis.org/en/guia/333</a> | UNKNOWN                                                                                                                                                                                              | Absent                         | Absent                         | Established |
| Animalia | Mollusca        | <i>Potamopyrgus antipodarum</i> (J. E. Gray, 1843)                     | Temperate Australasia       | 1948         | Western Mediterranean Sea | Boettger, 1951 [238]                                                                                            | TRANSPORT- STOWAWAY: Ship/boat ballast water<br>TRANSPORT- HITCHHIKERS: Hitchhikers on animals (except parasites, species transported by host/vector)                                                | Established                    | Established                    | Established |
| Animalia | Mollusca        | <i>Pseudofusus rostratus</i> (Olivi, 1792)                             | Mediterranean Sea           | 2006         | Northern Seas             | Nolf, 2009 [239]                                                                                                | TRANSPORT- HITCHHIKERS: Hitchhikers on animals (except parasites, species transported by host/vector)                                                                                                | Established                    | Absent                         | Native      |
| Animalia | Mollusca        | <i>Rangia cuneata</i> (G. B. Sowerby I, 1832)                          | Tropical Atlantic           | 2017         | Northern Seas             | Faillietaz et al. 2020 [240]                                                                                    | UNKNOWN                                                                                                                                                                                              | Established                    | Absent                         | Absent      |
| Animalia | Mollusca        | <i>Rapana venosa</i> (Valenciennes, 1846)                              | Temperate Northern Pacific  | 1997         | Bay of Biscay             | Camus, 2001 [241]                                                                                               | TRANSPORT- HITCHHIKERS: Hitchhikers on animals (except parasites, species transported by host/vector)<br>TRANSPORT- STOWAWAY: Ship/boat ballast water                                                | Absent                         | Established                    | Established |
| Animalia | Mollusca        | <i>Ruditapes philippinarum</i> (A. Adams & Reeve, 1850)                | Temperate Northern Pacific  | 1972         | Northern Seas             | Flassch, 1978 [242]                                                                                             | RELEASE IN NATURE: Fishery in the wild (including game fishing)<br>ESCAPE FROM CONFINEMENT: Aquaculture/ mariculture                                                                                 | Established                    | Established                    | Established |
| Animalia | Mollusca        | <i>Saccostrea glomerata</i> (Gould, 1850)                              | Temperate Australasia       | 2015         | Western Mediterranean Sea | Ulman et al. 2017 [153]                                                                                         | TRANSPORT- STOWAWAY: Ship/boat hull fouling                                                                                                                                                          | Absent                         | Absent                         | One record  |
| Animalia | Mollusca        | <i>Steromphala albida</i> (Gmelin, 1791)                               | Mediterranean Sea           | 1973         | Bay of Biscay             | Deleamarre & Le Neuthiec, 1995 [243]                                                                            | TRANSPORT- HITCHHIKERS: Hitchhikers on animals (except parasites, species transported by host/vector)                                                                                                | Established                    | Established                    | Native      |
| Animalia | Mollusca        | <i>Teredo navalis</i> Linnaeus, 1758                                   | Cryptogenic                 | 1865         | Northern Seas             | Clavenad, 1879 [123]                                                                                            | TRANSPORT- STOWAWAY: Ship/boat ballast water<br>TRANSPORT- STOWAWAY: Ship/boat hull fouling                                                                                                          | Established                    | Established                    | Established |
| Animalia | Mollusca        | <i>Tritia neritea</i> (Linnaeus, 1758)                                 | Mediterranean Sea           | 1976         | Bay of Biscay             | Bachelet et al. 1980 [244]                                                                                      | TRANSPORT- HITCHHIKERS: Hitchhikers on animals (except parasites, species transported by host/vector)<br>TRANSPORT- STOWAWAY: Organic packing material, in particular wood packaging                 | Invasive with no proven impact | Invasive with no proven impact | Native      |
| Animalia | Mollusca        | <i>Urosalpinx cinerea</i> (Say, 1822)                                  | Temperate Northern Atlantic | Before 1960  | Bay of Biscay             | Le Dantec, 1960 [245]                                                                                           | TRANSPORT- HITCHHIKERS: Hitchhikers on animals (except parasites, species transported by host/vector)                                                                                                | Established                    | Established                    | Absent      |
| Animalia | Mollusca        | <i>Xenostrobus securis</i> (Lamarck, 1819)                             | Temperate Australasia       | 2002         | Western Mediterranean Sea | Zenetos et al. 2004 [246]                                                                                       | TRANSPORT- STOWAWAY: Ship/boat ballast water<br>TRANSPORT- STOWAWAY: Ship/boat hull fouling<br>TRANSPORT- HITCHHIKERS: Hitchhikers on animals (except parasites, species transported by host/vector) | Absent                         | Established                    | Established |
| Animalia | Mollusca        | <i>Yoldia limatula</i> (Say, 1831)                                     | Temperate Northern Atlantic | 2021         | Northern Seas             | Dauvin et al. 2022 [247]                                                                                        | TRANSPORT- STOWAWAY: Ship/boat ballast water                                                                                                                                                         | Established                    | Absent                         | Absent      |
| Animalia | Nematoda        | <i>Anguillicola crassus</i> Kuwahara, Niimi & Itagaki, 1974            | Temperate Northern Pacific  | 1980         | Unknown - Bay of Biscay   | Fontaine et al. 1990 [248]                                                                                      | TRANSPORT- HITCHHIKERS: Hitchhikers on animals (except parasites, species transported by host/vector)                                                                                                | Casual                         | Casual                         | Casual      |
| Animalia | Platyhelminthes | <i>Koinostylochus ostreophagus</i> (Hyman, 1955)                       | Temperate Northern Pacific  | In the 1970s | Bay of Biscay             | Maurin & Le Dantec, 1979 [249]                                                                                  | TRANSPORT- HITCHHIKERS: Hitchhikers on animals (except parasites, species transported by host/vector)                                                                                                | Casual                         | Casual                         | Absent      |
| Animalia | Platyhelminthes | <i>Pseudodactylogyrus anguillae</i> (Yin & Sproston, 1948) Gusev, 1965 | Temperate Northern Pacific  | 1984         | Western Mediterranean Sea | Lambert et al. 1984 [250]                                                                                       | TRANSPORT- HITCHHIKERS: Hitchhikers on animals (except parasites, species transported by host/vector)                                                                                                | Casual                         | Casual                         | Casual      |

|          |          |                                                               |                            |      |                               |                                                                                                                                                                                                             |                                                                                                                                                      |             |                         |             |
|----------|----------|---------------------------------------------------------------|----------------------------|------|-------------------------------|-------------------------------------------------------------------------------------------------------------------------------------------------------------------------------------------------------------|------------------------------------------------------------------------------------------------------------------------------------------------------|-------------|-------------------------|-------------|
| Animalia | Porifera | <i>Celtodoryx ciocalyptoides</i> (Burton, 1935)               | Temperate Northern Pacific | 1996 | Morbihan gulf - Bay of Biscay | Perez et al. 2006 [251]                                                                                                                                                                                     | TRANSPORT- HITCHHIKERS: Hitchhikers on animals (except parasites, species transported by host/vector)<br>TRANSPORT- STOWAWAY: Ship/boat hull fouling | Established | Established to invasive | Absent      |
| Animalia | Porifera | <i>Paraleucilla magna</i> Klautau, Monteiro & Borojevic, 2004 | Tropical Atlantic          | 2006 | Western Mediterranean Sea     | Citizen sciences (DORIS): <a href="https://doris.ffesm.fr/Especes/Paraleucilla-magna-Eponge-bourse-a-paillettes-4104">https://doris.ffesm.fr/Especes/Paraleucilla-magna-Eponge-bourse-a-paillettes-4104</a> | UNKNOWN                                                                                                                                              | Absent      | Absent                  | Established |

- Verlaque, M.; Boudouresque, C.-F.; Meinesz, A.; Gravez, V. The *Caulerpa racemosa* Complex (Caulerpales, Ulvophyceae) in the Mediterranean Sea. *Bot. Mar.* **2000**, *43*, 49–68.
- Meinesz, A.; de Vaugelas, J.; Hesse, B.; Mari, X. Spread of the Introduced Tropical Green Alga *Caulerpa taxifolia* in Northern Mediterranean Waters. *J. Appl. Phycol.* **1993**, *5*, 141–147.
- Verlaque, M.; Boudouresque, C.-F.; Mineur, F. Oyster Transfers as a Vector for Marine Species Introductions: A Realistic Approach Based on the Macrophytes. In Proceedings of the CIESM Workshop Monographs; Lisboa, 2007; Vol. 32, pp. 39–48.
- Silva, P.C. The Dichotomous Species of *Codium* in Britain. *J. Mar. Biol. Assoc. U. K.* **1955**, *34*, 565–577.
- Gerbal, M.; Ben Maiz, N.; Boudouresque, C.-F. Les Peuplements à *Sargassum muticum* de l'étang de Thau : Données Préliminaires Sur La Flore Algale. In Proceedings of the Actes Congrès National Sociétés Savantes; 1985; Vol. 110, pp. 241–254.
- Ben Maiz, N. Flore Algale (Rhodophyta, Phaeophyceae, Chlorophyceae et Bryopsidophyceae) de l'étang de Thau (Hérault). Thèse de 3e cycle, Université d'Aix-Marseille II, 1986.
- Mineur, F.; Johnson, M.P.; Maggs, C.A.; Stegenga, H. Hull Fouling on Commercial Ships as a Vector of Macroalgal Introduction. *Mar. Biol.* **2007**, *151*, 1299–1307, doi:10.1007/s00227-006-0567-y.
- Verlaque, M.; Ruitton, S.; Mineur, F.; Boudouresque, C.-F. *CIESM atlas of exotic species in the Mediterranean: 4. Macrophytes*; CIESM Publishers: Monaco.; 2015; ISBN 978-92-990003-4-2.
- Boudouresque, C.-F.; Perret, M. *Inventaire de La Flore Marine de Corse (Méditerranée) : Rhodophyceae, Phaeophyceae, Chlorophyceae et Bryopsidophyceae*; Bibliotheca Phycologica; Lubrecht & Cramer Ltd: Port Jervis, 1977; Vol. 25; ISBN 978-3-7682-1080-5.
- Boillot, A.; Caram, B.; Meinesz, A. Sur l'*Acrothamnion preissii* Rhodophycée (Céramiale, Céramiacée) Nouvelle Pour La Flore Française. *Cryptogam. Algol.* **1982**, *3*, 21–24.
- Mollet, J.-C.; Rahaoui, A.; Lemoine, Y. Yield, Chemical Composition and Gel Strength of Agarocolloids of *Gracilaria Gracilis*, *Gracilariopsis Longissima* and the Newly Reported *Gracilaria* Cf. *vermiculophylla* from Roscoff (Brittany). *J. Appl. Phycol.* **1998**, *10*, 59–66, doi:10.1023/A:1008051528443.
- Verlaque, M.; Tine, J. Marine Vegetation of Toulon (Var, France): Algae and Seagrasses. *Thalassographica* **1981**, *4*, 5–38.
- Verlaque, M. Checklist of the Macroalgae of Thau Lagoon (Hérault, France), a Hot Spot of Marine Species Introduction in Europe. *Oceanol. Acta* **2001**, *24*, 29–49, doi:10.1016/S0399-1784(00)01127-0.
- Feldmann-Mazoyer, G.; Meslin, R. Note Sur Le *Neomonospora furcellata* (J. Ag.) Comb. Nov. et Sa Naturalisation Dans La Manche. *Rev. Générale Bot.* **1939**, *51*, 193–203.
- Klein, J.C.; Verlaque, M. Macroalgae Newly Recorded, Rare or Introduced to the French Mediterranean Coast. *Cryptogam. Algol.* **2011**, *32*, 111–130, doi:10.7872/crya.v32.iss2.2011.111.
- Halos, M.-T. Etude Morphologique et Systématique de Quelques Céramiacées de La Manche. Thèse de Doctorat 3ème cycle, Université de Paris, 1964.
- Verlaque, M.; Riouall, R. Introduction de *Polysiphonia nigrescens* et d'*Antithamnion nipponicum* (Rhodophyta, Ceramiales) Sur Le Littoral Méditerranéen Français. *Cryptogam. Algol.* **1989**, *10*, 313–323.

18. Feldmann, J. Sur Une Algue Marine Nouvelle Pour Les Côtes Françaises de La Manche. *Bull. Lab. Dinard* **1937**, 17, 43–45.
19. Hamel, G. Sur l'apparition d'une Algue Nouvelle Sur Les Côtes de Bretagne et de Normandie (*Antithamnionella sarniensis* Lyle). *Rev. Algol.* **1924**, 1, 50–52.
20. Verlaque, M.; Bernard, G. *Inventaire de La Flore Marine de La Principauté de Monaco*; GIS Posidonie: Marseille, France, 1998; pp. 1–55;.
21. Sauvageau, C. Sur La Naturalisation En France d'une Floridée Australasienne (*Asparagopsis armata* Harv.) et Sur Ses Iodures. *Comptes Rendus Académie Sci.* **1925**, 180, 1887.
22. Davy de Virville, A.D. Observations Sur La Flore Des Iles Chausey Faites Au Cours de La Croisière Du Laboratoire de Dinard (24–30 Août 1938). *Bull. Lab. Marit. Dinard* **1938**, XX, 6–22.
23. Hamel, G. *Chlorophycées Des Côtes Françaises*; Paris, 1931;
24. Rio, A.; Cabioch, J. Apparition Du *Caulacanthus ustulatus* (Rhodophyta, Gigartinales) Dans La Manche Occidentale. *Cryptogam. Algol.* **1988**, 9, 231–234.
25. Auby, I. *Évolution de La Richesse Biologique Du Bassin d'Arcachon*; IFREMER: Arcachon, 1993;
26. Verlaque, M. Contribution à l'étude Du Phytobenthos d'un Écosystème Photophile Thermophile Marin En Méditerranée Occidentale. Étude Structurale et Dynamique Du Phytobenthos et Analyse Des Relations Faune-Flore. Thèse de Doctorat es Sciences naturelles, Université Aix-Marseille: Marseille, 1987.
27. Verlaque, M.; Latala, A. The Accidental Introduction of the Japanese Species *Chondrus* (Gigartinaceae, Rhodophyta) into the Thau Lagoon, France, the Mediterranean. *Cryptogam. Algol.* **1996**, 17, 153–164.
28. Bidoux, C.; Magne, F. Étude de Quelques Acrochaetiales (Rhodophyta) Devant Être Rapportés Au Genre *Rhodothamniella*. *Cryptogam. Algol.* **1989**, 10, 33–55.
29. Sjøtun, K. Present Distribution and Possible Vectors of Introductions of the Alga *Heterosiphonia japonica* (Ceramiales, Rhodophyta) in Europe. *Aquat. Invasions* **2008**, 3, 377–394, doi:10.3391/ai.2008.3.4.3.
30. Magne, F. *Goniotrichopsis* (Rhodophyceae, Porphyridiales) in Europe. *Cryptogam. Algol.* **1992**, 13, 109–112.
31. Mineur, F.; Le Roux, A.; Stegenga, H.; Verlaque, M.; Maggs, C.A. Four New Exotic Red Seaweeds on European Shores. *Biol. Invasions* **2012**, 14, 1635–1641, doi:10.1007/s10530-012-0186-0.
32. Verlaque, M.; Brannock, P.M.; Komatsu, T.; Villalard-Bohnsack, M.; Marston, M. The Genus *Grateloupia* C. Agardh (Halymeniaceae, Rhodophyta) in the Thau Lagoon (France, Mediterranean): A Case Study of Marine Plurispecific Introductions. *Phycologia* **2005**, 44, 477–496, doi:10.2216/0031-8884(2005)44[477:TGGCAH]2.0.CO;2.
33. Cecere, E.; Petrocelli, A.; Portacci, G.; Mineur, F.; Verlaque, M. *Grateloupia minima* (Rhodophyta, Gigartinales) in the Thau Lagoon and in the Mar Piccolo of Tranto: First Report for the Mediterranean Sea. In Proceedings of the Bollettino Dei Musei e Degli Istituti Biologici Dell'Università Di Genova; 2011; Vol. 73, p. 71.
34. Cabioch, J.; Castric-Fey, A.; L'Hardy-Halos, M.-T.; Rio, A. *Grateloupia doryphora* et *Grateloupia filicina* Var. *luxurians* (Rhodophyta, Halymeniaceae) Sur Les Côtes de Bretagne (France). *Cryptogam. Algol.* **1997**, 18, 117–137.
35. Riouall, R.; Guiry, M.D.; Codomier, L. Introduction d'une Espèce Foliacée de *Grateloupia* Dans La Flore Marine de l'étang de Thau (Hérault, France). *Cryptogam. Algol.* **1985**, 6, 91–98.
36. Bárbara, I.; Tapia, P.D. New Records and Additions to the Seaweeds of France. *Mar. Biodivers. Rec.* **2012**, 5, e75, doi:10.1017/S1755267212000589.
37. Klein, J.; Ruitton, S.; Verlaque, M.; Boudouresque, C.-F. Species Introductions, Diversity and Disturbances in Marine Macrophyte Assemblages of the Northwestern Mediterranean Sea. *Mar. Ecol. Prog. Ser.* **2005**, 290, 79–88, doi:10.3354/meps290079.
38. Cabioch, J.; Noailles, M.C.; Thomas, J.C. *Laurencia brongniartii* (Rhodophyta, Ceramiales) En Rade de Brest, Espèce Nouvelle Pour Les Côtes Européennes. *Cryptogam. Algol.* **1990**, 11, 197–202.
39. Klein, J.; Verlaque, M. *Laurencia caduciramulosa* Masuda & Kawaguchi (Ceramiales, Rhodophyceae), First Record on the Mediterranean Coast of France. *Cryptogam. Algol.* **2005**, 26, 209–216.
40. Geoffroy, A. Diversité Génétique et Délimitation d'espèces Par Des Approches Conjointes de Barcoding et de Génétique Des Populations : Application à l'identification d'espèces d'algues Marines Nouvellement Cultivées. Thèse de doctorat, Université Pierre et Marie Curie: Paris 6, 2012.

41. Baffreau, A.; Pezy, J.-P.; Rusig, A.-M.; Mussio, I.; Dauvin, J.-C. *Les Espèces Marines et Animales et Végétales Introduites En Normandie*; Imprimerie Moderne de Bayeux.; 2018;
42. Mineur, F.; De Clerck, O.; Le Roux, A.; Maggs, C.A.; Verlaque, M. *Polyopes lancifolius* (Halymeniales, Rhodophyta), a New Component of the Japanese Marine Flora Introduced to Europe. *Phycologia* **2010**, *49*, 86–96, doi:10.2216/09-45.1.
43. McIvor, L.; Maggs, C.A.; Provan, J.; Stanhope, M.J. RbcL Sequences Reveal Multiple Cryptic Introductions of the Japanese Red Alga *Polysiphonia harveyi*. *Mol. Ecol.* **2001**, *10*, 911–919, doi:10.1046/j.1365-294X.2001.01240.x.
44. Lauret, M. Morphologie, Phénologie, Répartition Des *Polysiphonia* Marins Du Littoral Languedocien. II- Section *Polysiphonia*. *Nat. Monspel. Bot.* **1970**, *21*, 121–163.
45. ICES Working Group on Introductions and Transfers of Marine Organisms (WGITMO); ICES Scientific Reports, 1982; Vol. 4;.
46. Verlaque, M. Contribution à La Flore Des Algues Marines de Méditerranée : Espèces Nouvelles Pour La Méditerranée Occidentale. *Bot. Mar.* **1981**, *24*, 559–568, doi:10.1515/botm.1981.24.11.559.
47. Knoepffler, M.; Noailles, M.C.; Boudouresque, C.-F.; Abelard, O. Phytobenthos Des Pyrénées-Orientales : Complément à l'inventaire : Présence d'espèces Non-Indigènes (*Sargassum* et *Undaria*). *Bull. Société Zool. Fr.* **1990**, *115*, 37–43.
48. Ardré, F.; L'Hardy-Halos, M.-T.; Saldanha, L. Observations Nouvelles Sur La Morphologie et La Répartition Géographique de Trois Cérámiales *Ceramium cinnabarinum*, *Mesothamnion caribaeum* et *Ctenosiphonia hypnoides*. *Cryptogam. Algal.* **1982**, *3*, 3–20.
49. Verlaque, M.; Auby, I.; Plus, M.; Belsher, T. *Étude de La Flore Introduite Dans Le Bassin d'Arcachon*; Ifremer: FRANCE, 2008;
50. Verlaque, M. Contribution à La Flore Des Algues Marines de Méditerranée : Espèces Rares Ou Nouvelles Pour Les Côtes Françaises. *Bot. Mar.* **1989**, *32*, 101–113.
51. Pezy, J.-P.; Baffreau, A.; Raoux, A.; Rusig, A.-M.; Mussio, I.; Dauvin, J.-C. Non-Indigenous Species in Marine and Brackish Waters along the Normandy Coast. *BioInvasions Rec.* **2021**, *10*, 755–774, doi:10.3391/bir.2021.10.4.01.
52. Thibaut, T.; Blanfuné, A.; Boudouresque, C.-F.; Holon, F.; Agel, N.; Descamps, P.; Deter, J.; Pavy, T.; Delaruelle, G.; Verlaque, M. Distribution of the Seagrass *Halophila stipulacea*: A Big Jump to the Northwestern Mediterranean Sea. *Aquat. Bot.* **2022**, *176*, 103465, doi:10.1016/j.aquabot.2021.103465.
53. Chevalier, A. Note Sur Les *Spartina* de La Flore Française. *Bull. Société Bot. Fr.* **1923**, *70*, 54–63.
54. Marchand, C.J. Evolution in *Spartina* (Gramineae). I. The History and Morphology of the Genus in Britain. *J. Linn. Soc. Bot.* **1967**, *60*, 1–24.
55. Fabre, M.E. Description d'une Nouvelle Espèce de *Spartina*, Abondante Sur Une Portion Du Littoral Méditerranéen. *Ann. Sci. Nat.-Bot. Biol. Veg.* **1849**, *3*, 122–125.
56. Corbière, L.; Chevalier, A. Sur l'origine Du *Spartina townsendi* et Sur Son Rôle Dans La Fixation Des Vases Marines. *Comptes Rendus L'Académie Sci. Paris* **1922**, *174*, 1084–1087.
57. Riouall, R. Sur La Présence Dans l'étang de Thau (Hérault-France) de *Sphaerotrichia divaricata* (C. Ag.) Kylin et *Chorda filum* (L.) Stackhouse. *Bot. Mar.* **1985**, *28*, 83–86.
58. Fabre-Domergue, P. Une Invasion d'algues Méridionales (*Colpomenia sinuosa*) Sur Les Huîtres de La Rivière de Vannes. *Comptes-Rendus* **1907**, *142*, 1223–1225.
59. Steen, F.; Aragay, J.; Zuljevic, A.; Verbruggen, H.; Mancuso, F.P.; Bunker, F.; Vitales, D.; Gómez Garreta, A.; De Clerck, O. Tracing the Introduction History of the Brown Seaweed *Dictyota cyanoloma* (Phaeophyceae, Dictyotales) in Europe. *Eur. J. Phycol.* **2017**, *52*, 31–42, doi:10.1080/09670262.2016.1212998.
60. Calvet, L. Coup d'oeil Sur La Faune et La Flore de La Région Marine de Cette. *Trav. Inst. Montpellier* **1905**, *15*, 1–96.
61. Braud, J.P.; Etcheverry, H.; Pérez, R. Développement de l'algue *Macrocystis pyrifera* (L.) Ag. Sur Les Côtes Bretonnes. *Sci. Pêche* **1974**, *233*, 1–15.
62. Hariot, P. Flore Algologique de La Hougue et de Tatihou. *Ann. Inst. Océan. Monaco* **1912**, *4*, 1–54.
63. Verlaque, M.; Steen, F.; De Clerck, O. *Rugulopteryx* (Dictyotales, Phaeophyceae), a Genus Recently Introduced to the Mediterranean. *Phycologia* **2009**, *48*, 536–542, doi:10.2216/08-103.1.
64. Gruet, Y. Présence de l'algue Japonaise *Sargassum muticum* (Yendo) Fensholt, Sur La Côte Française de Normandie. *Bull. Société Sci. Nat. Ouest Fr.* **1976**, *74*, 101–104.
65. Perez, R. Culture expérimentale de l'algue *Undaria pinnatifida* sur les côtes de France. *Sci. Pêche Bull. Institutionnel Pêch. Marit.* **1981**, *315*, 1–16.

66. Saiz-Salinas, J.I.; Amouroux, J.-M. First Record of the Genus *Arhynchite* (Echiura) in the Mediterranean Sea. *Vie Milieu* **2010**, *60*, 47–51.
67. Droual, G.; Curd, A.; Gauff, R.P.M.; Gouillieux, B.; Gélinaud, G.; Cabelguen, J.; Grall, J. The French Benthic Newcomers: New Records of *Ampithoe valida* S. I. Smith, 1873 and *Polydora colonia* Moore, 1907 in Brittany, First Record of *Bispira polyomma* Giangrande & Faasse, 2012 in the North-East Atlantic and Northernmost Record of *Prostheceraeus moseleyi* Lang, 1884 in Europe. *BiolInvasion Rec.* **2023**.
68. ICES Working Group on Introductions and Transfers of Marine Organisms (WGITMO); ICES Scientific Reports, 2022; Vol. 4, p. 209 p.;
69. Fauvel, P. *Polychètes Sédentaires : Addenda Aux Errantes, Archiannélides, Myzostomaires*; Faune de France; Fédération Française des Sociétés de Sciences Naturelles. Office Central de Faunistique: Paris, 1927; Vol. 16.;
70. Radashevsky, V.I.; Pankova, V.V.; Malyar, V.V.; Neretina, T.V.; Wilson, R.S.; Worsfold, T.M.; Diez, M.E.; Harris, L.H.; Hourdez, S.; Labrune, C.; et al. Molecular Analysis and New Records of the Invasive Polychaete *Boccardia proboscidea* (Annelida: Spionidae). *Mediterr. Mar. Sci.* **2019**, *20*, 393–408, doi:10.12681/mms.20363.
71. Sato-Okoshi, W.; Okoshi, K.; Abe, H.; Dauvin, J.-C. Polydorid Species (Annelida: Spionidae) Associated with Commercially Important Oyster Shells and Their Shell Infestation along the Coast of Normandy, in the English Channel, France. *Aquac. Int.* **2022**, doi:10.1007/s10499-022-00971-y.
72. Gagnon, S. *Étude Qualitative et Quantitative de l'infestation Des Huîtres Creuses, Crassostrea gigas, Par Le Ver Polydora (Annélides Polychètes)*; Université Catholique de l'Ouest, 1999;
73. Sauriau, P.-G.; Aubert, F.; Almeida Ferreira, L.; Cajeri, P.; Curti, C.; Latry, L.; Sauriau, M.; Sauriau, F.; Leguay, D.; Pineau, P. *Contrôle de Surveillance 2012 DCE de La Flore Benthique et de La Faune Benthique de Substrat Meuble de La Masse d'eau Côtière Pertuis Charentais FRFC02 : Macrofaune Invertébrée Benthique*; UMR LIENSS, 2013; p. 55.;
74. Tiralongo, F.; Akyol, O.; Al Mabruk, S.A.A.; Battaglia, P.; Beton, D.; Bitlis, B.; Borg, J.A.; Bouchoucha, M.; Çinar, M.E.; Crocetta, F.; et al. New Alien Mediterranean Biodiversity Records (August 2022). *Mediterr. Mar. Sci.* **2022**, *23*, 725–747, doi:10.12681/mms.31228.
75. Le Garrec, V.; Grall, J.; Chevalier, C.; Guyonnet, B.; Jourde, J.; Lavesque, N.; Bonifácio, P.; Blake, J.A. *Chaetozone corona* (Polychaeta, Cirratulidae) in the Bay of Biscay: A New Alien Species for the North-East Atlantic Waters? *J. Mar. Biol. Assoc. U. K.* **2017**, *97*, 433–445, doi:10.1017/S0025315416000540.
76. Glaçon, R. *Faune et Flore Du Littoral Du Pas-de-Calais et de La Manche Orientale*; Documentation de la Station Marine de Wimereux, 1977; p. 51.;
77. Guyonnet, B.; Borg, D. Premier signalement de l'espèce introduite *Euchone limnicola* Reish, 1959 (Polychaeta : Sabellidae) sur les côtes françaises de la Mer du Nord (Grand Port Maritime de Dunkerque). **2015**.
78. Blanchet, A.; Chevalier, C.; Gaffet, J.-D.; Hamon, D. *Bionomie Benthique Subtidale En Baie de Douarnenez*; IFREMER, 2004;
79. Saint-Joseph, A.A. Les Annélides Polychètes Des Côtes de France (Océan et Côtes de Provence). *Ann. Sci. Nat.* **1906**, *9*, 145–260.
80. Tempesti, J.; Langeneck, J.; Romani, L.; Garrido, M.; Lardicci, C.; Maltagliati, F.; Castelli, A. Harbour Type and Use Destination Shape Fouling Community and Non-Indigenous Species Assemblage: A Study of Three Northern Tyrrhenian Port Systems (Mediterranean Sea). *Mar. Pollut. Bull.* **2022**, *174*, 113191, doi:10.1016/j.marpolbul.2021.113191.
81. Berner, L. Le Peuplement Des Coques de Bateaux à Marseille. *Bull. Inst. Océan. Monaco* **1944**, *858*, 1–44.
82. Zibrowius, H. Introduction Du Polychète Serpulidae Japonais *Hydroides ezoensis* Sur La Côte Atlantique Française et Remarques Sur La Propagation d'autres Espèces de Serpulidae. *Téthys* **1978**, *8*, 141–150.
83. Conté, R. *Inventaire Des Peuplements de Coralligène de La Côte de Banyuls-Sur-Mer et Comparaison à 56 Ans d'intervalle*; Université de Montpellier, 2022; p. 83.;
84. Dewarumez, J.-M.; Gevaert, F.; Massé, C.; Foveau, A.; Desroy, N.; Grulois, D. *Les Espèces Marines Animales et Végétales Introduites Dans Le Bassin Artois-Picardie*; 2011;
85. Lavesque, N.; Daffe, G.; Bonifácio, P.; Hutchings, P. A New Species of the *Marphysa sanguinea* Complex from French Waters (Bay of Biscay, NE Atlantic) (Annelida, Eunicidae). *ZooKeys* **2017**, *716*, 1–17, doi:10.3897/zookeys.716.14070.

86. Lavesque, N.; Hutchings, P.; Abe, H.; Daffe, G.; Gunton, L.; Glasby, C. Confirmation of the Exotic Status of *Marphysa victori* Lavesque, Daffe, Bonifácio & Hutchings, 2017 (Annelida) in French Waters and Synonymy of *Marphysa bulla* Liu, Hutchings & Kupriyanova, 2018. *Aquat. Invasions* **2020**, *15*, 355–366, doi:10.3391/ai.2020.15.3.01.
87. Harmelin, J.G. Étude de l'endofaune Des "Mattes" d'herbiers de *Posidonia oceanica* Delile. *Recl. Trav. Stn. Mar. Endoume* **1964**, *35*, 43–105.
88. Harmelin, J.G. Note Sur Trois Capitellidae (Annélides Polychètes) Récoltés En Méditerranée, Avec Description d'un Nouveau Genre : *Peresiella*. *Recl. Trav. Stn. Mar. Endoume* **1968**, *43*, 253–259.
89. Zibrowius, H.; Bianchi, C.N. *Spirorbis marioni* et *Pileolaria berkeleyana* Spirorbidae Exotiques Dans Les Ports de La Méditerranée Nord-Occidentale. *Rapp Comm Int Mer Medit* **1981**, *27*, 2.
90. Fauvel, P. *Polychètes Errantes*; Faune de France; Fédération Française des Sociétés de Sciences Naturelles. Office Central de Faunistique: Paris, 1923; Vol. 5;.
91. da Fonsêca-Genevois, V.; Cazaux, C. *Streblospio benedicti* Webster, 1879 (Annélide Polychète) Dans l'estuaire de La Loire : Biologie et Écologie. *Cah. Biol. Mar.* **1987**, *28*, 231–261, doi:10.21411/CBM.A.5D5F6199.
92. Pérès, J.-M. Ascidies de La Roche Littorale Corse. *Recl. Trav. Stn. Mar. Endoume* **1952**, *2*, 35–43.
93. Lavesque, N.; Londoño-Mesa, M.H.; Daffe, G.; Hutchings, P. A Revision of the French Telothelepodidae and Thelepodidae (Annelida, Terebelliformia), with Descriptions of Three Species and First European Record of a Non-Indigenous Species. *Zootaxa* **2020**, *4810*, 305–327, doi:10.11646/zootaxa.4810.2.4.
94. Remy, P. Note Sur Un Copépode de l'eau Saumâtre Du Canal de Caen à La Mer [*Acartia (Acanthacartia) tonsa* Dana]. *Ann. Biol. Lacustre* **1927**, *15*, 169–186.
95. Seuront, L. First Record of the Calanoid Copepod *Acartia omorii* (Copepoda: Calanoida: Acartiidae) in the Southern Bight of the North Sea. *J. Plankton Res.* **2005**, *27*, 1301–1306, doi:10.1093/plankt/fbi088.
96. Le Roux, A.; Gélinaud, G.; Le Bail, Y.; Monnat, J.-Y.; Morel, J.-Y.; Paraire, O.; Ros, J. Occurrence of *Ammothea hilgendorfi* (Böhm, 1879) a Pycnogonid from the North Pacific, in Étel River. *Aod - Cah. Nat. Obs. Mar.* **2020**, *8*, 21–32.
97. Bishop, M.W.H. Distribution of *Balanus amphitrite* Darwin Var. *denticulata* Broch. *Nature* **1950**, *165*, 409–410.
98. Barnes, H.; Barnes, M.; Klepal, W. Some Cirripedes of the French Atlantic Coast. *J. Exp. Mar. Biol. Ecol.* **1972**, *8*, 187–194, doi:https://doi.org/10.1016/0022-0981(72)90019-6.
99. Fischer, P. Crustacés Podophthalmaires et Cirrhipèdes Du Département de La Gironde et Des Côtes Du Sud-Ouest de La France. *Actes Société Linn. Bordx.* **1872**, *28*, 405–438.
100. Goulletquer, P. *Guide Des Organismes Exotiques Marins*; Éditions Belin: Paris, 2016; ISBN 978-2-7011-9020-4.
101. Faasse, M.A. New Records of the Non-Native Amphipod *Ampithoe valida* in Europe. *Mar. Biodivers. Rec.* **2015**, *8*, e87, doi:10.1017/S1755267215000706.
102. Gouillieux, B.; Lavesque, N.; Leclerc, J.-C.; Le Garrec, V.; Viard, F.; Bachelet, G. Three Non-Indigenous Species of *Aoroides* (Crustacea: Amphipoda: Aoridae) from the French Atlantic Coast. *J. Mar. Biol. Assoc. U. K.* **2016**, *96*, 1651–1659, doi:10.1017/S0025315415002027.
103. Thiéry, A.; Robert, F. Bisexual Populations of the Brine Shrimp *Artemia* in Sète-Villeroys and Villeneuve Saltworks (Languedoc, France). *Int. J. Salt Lake Res.* **1992**, *1*, 47–63, doi:10.1007/BF02904951.
104. Bishop, M.W.H. *Elminius modestus* in France. *Nature* **1954**, *173*, 1145–1145.
105. Gruvel, 1920 Cirripèdes Provenant Des Campagnes Scientifiques de S.A.S. Le Prince de Monaco (1885-1913). *Résultats Camp. Sci. Accompl. Sur Son Yacht Par Albert 1er Prince Souver. Monaco* *53*, 1–88.
106. Bourdon, R. *Inventaire de La Faune Marine de Roscoff. Décapodes et Stomatopodes*; Éditions de la Station Biologique de Roscoff: Roscoff, France, 1965;
107. Bouvier, E.L. Sur Un *Callinectes sapidus* M. Rathbun Trouvé à Rochefort. *Bull. Muséum Natl. Hist. Nat. Paris* **1901**, *7*, 16–17.
108. Breton, G. L'amphipode *Caprella mutica* Schurin, 1935, Espèce Introduite et Invasive, Abonde Dans Les Bassins à Flot Du Port Du Havre (Manche Orientale, France). *Bull. Trimest. Société Géologique Normandie Amis Muséum Havre* **2005**, *92*, 77.

109. Ros, M.; Tierno de Figueroa, J.M.; Guerra-García, J.M.; Navarro-Barranco, C.; Lacerda, M.B.; Vázquez-Luis, M.; Masunari, S. Exploring Trophic Strategies of Exotic Caprellids (Crustacea: Amphipoda): Comparison between Habitat Types and Native vs Introduced Distribution Ranges. *Estuar. Coast. Shelf Sci.* **2014**, *139*, 88–98, doi:10.1016/j.ecss.2013.12.033.
110. Aubert, F.; Sauriau, P.-G. First Record of Say's Mud Crab *Dyspanopeus sayi* (Smith, 1869) from the Seudre Estuary (Marennes-Oléron, French Atlantic Coast). *Aod - Cah. Nat. Obs. Mar.* **2015**, *IV*, 9–27.
111. Walker, A.O. Contributions to the Malacostracan Fauna of the Mediterranean. *J. Linn. Soc. Lond. Zool.* **1901**, *28*, 290–307.
112. Hoestlandt, H. Données Récentes de Biogéographie Sur l'extension de l' *Eriocheir sinensis* (Crabe Chinois) En France: Avec 1 Carte Dans Le Texte. *SIL Proc. 1922-2010* **1948**, *10*, 168–172, doi:10.1080/03680770.1948.11895136.
113. Brylinski, J.-M. The Pelagic Copepods in the Strait of Dover (Eastern English Channel). A Commented Inventory 120 Years after Eugène Canu. *Cah. Biol. Mar.* **2009**, *50*, 251–260, doi:10.21411/CBM.A.518F2498.
114. Sautour, B. Populations Zooplanctoniques Dans Le Bassin de Marennes-Oléron ; Dynamique de Population, Nutrition et Production Des Copépodes Dominants. Thèse de doctorat, Université Bordeaux 1, 1991.
115. Gruet, Y.; Héral, M.; Robert, J.-M. Premières Observations Sur l'introduction de La Faune Associée Au Naissain d'huîtres Japonaises *Crassostrea gigas* (Thunberg), Importé Sur La Côte Atlantique Française. *Cah. Biol. Mar.* **1976**, *17*, 173–184, doi:10.21411/CBM.A.541FADA5.
116. Jourde, J.; Sauriau, P.-G.; Guenneteau, S.; Caillot, E. First Record of *Grandidierella japonica* Stephensen, 1938 (Amphipoda: Aoridae) from Mainland Europe. *BiolInvasions Rec.* **2013**, *2*, 51–55, doi:10.3391/bir.2013.2.1.09.
117. Pezy, J.-P.; Shahdadi, A.; Baffreau, A.; d'Udekem d'Acoz, C.; Schubart, C.D.; Dauvin, J.-C. An Unexpected Record of an African Mangrove Crab, *Perisesarma alberti* Rathbun, 1921, (Decapoda: Brachyura: Sesarmidae) in European Waters. *Mar. Biodivers. Rec.* **2017**, *10*, 33, doi:10.1186/s41200-017-0135-9.
118. Breton, G.; Faasse, M.; Noël, P.; Vincent, T. A New Alien Crab in Europe: *Hemigrapsus sanguineus* (Decapoda: Brachyura: Grapsidae). *J. Crustac. Biol.* **2002**, *22*, 184–189, doi:10.1651/0278-0372(2002)022[0184:ANACIE]2.0.CO;2.
119. Noël, P.Y.; Tardy, E.; d'Udekem d'Acoz, C. Will the Crab *Hemigrapsus penicillatus* Invade the Coasts of Europe? *Comptes Rendus Académie Sci. - Sér. III - Sci. Vie* **1997**, *320*, 741–745, doi:10.1016/S0764-4469(97)84823-8.
120. d'Udekem d'Acoz, C. *Inventaire et Distribution Des Crustacés Décapodes de l'Atlantique Nord-Oriental, de La Méditerranée et Des Eaux Continentales Adjacentes Au Nord de 25°N*; Muséum National d'Histoire Naturelle, Paris; 1999; Vol. 40;.
121. Gouillieux, B. First Record of the Invasive Species *Ianiropsis serricaudis* Gurjanova, 1936 (Crustacea: Isopoda) in Arcachon Bay, Bay of Biscay (NE Atlantic). *BiolInvasions Rec.* **2018**, *7*, 171–176, doi:10.3391/bir.2018.7.2.09.
122. Bachelet, G.; Acolas, M.L.; Baudrimont, M.; Blanchet, H.; Daverat, F.; Garabetian, F.; Labadie, P.; Legeay, A.; Leconte, M.; Lepage, M.; et al. Biodiversité et Fonctionnement Écologique. In *L'estuaire de la Gironde : un écosystème altéré ? Entre dynamique naturelle et pressions anthropiques*; 2020; pp. 132–209.
123. Clavenad, M. Restauration Des Fondations Du Bâtiment Des Subsistances de La Marine de Cherbourg. *Mém. Société Natl. Sci. Nat. Mathématique Cherbg.* **1879**, *3*, 73–144.
124. Blanchard, M.; Gouilletquer, P.; Hamon, D.; Le Mao, P.; Nezan, E.; Gentil, F.; Simon, N.; Viard, F.; Ar Gall, E.; Grall, J.; et al. Liste Des Espèces Marines Introduites Dans Les Eaux Bretonnes et Des Espèces Introduites Envahissantes Des Eaux Périphériques 2010.
125. Le Roux, A. Aperçu de La Faune Des Xylophages Marins Du Golfe Du Morbihan. *Bull. Société Sci. Nat. Ouest Fr.* **2009**, *31*, 75–83.
126. Gouilletquer, P.; Bachelet, G.; Sauriau, P.-G.; Noel, P. Open Atlantic Coast of Europe — A Century of Introduced Species into French Waters. In *Invasive Aquatic Species of Europe*; Leppäkoski, E., Gollash, S., Olenin, S., Eds.; Springer Netherlands: Dordrecht, 2002; pp. 276–290.
127. Gouillieux, B.; Lavesque, N.; Blanchet, H.; Bachelet, G. First Record of the Non-Indigenous *Melita nitida* Smith, 1873 (Crustacea: Amphipoda: Melitidae) in the Bay of Biscay (NE Atlantic). *BiolInvasions Rec.* **2016**, *5*, 85–92, doi:10.3391/bir.2016.5.2.05.
128. Chevreux, É. *Révision Des Amphipodes de La Côte Océanique de France*; Association française pour l'avancement des sciences, 1898; pp. 474–485;.

129. Bertrand, H. Amphipodes Nouveaux Pour La Faune Française. *Bull. Lab. Dinard* **1938**, 18, 34–37.
130. Gouillieux, B.; Massé, C. First Record of *Monocorophium uenoi* (Stephenson, 1932) (Crustacea: Amphipoda: Corophiidae) in the Bay of Biscay, French Atlantic Coast. *BiolInvasions Rec.* **2019**, 8, 87–95, doi:10.3391/bir.2019.8.1.09.
131. Comps, M. On a Copepod Parasitizing the Portuguese Oyster (*Crassostrea angulata* Lmk) in the Marennes-Oléron Basin. (Sur Un Copépode Parasite de l’huître Portugaise (*Crassostrea angulata* Lmk) Dans Le Bassin de Marennes-Oléron.) 1972.
132. Lambert, L. “Le Cop Rouge” (*Mytilicola intestinalis* Steuer) Sur Les Côtes de France. *Rev. Trav. Off. Pêch.* **1951**, XII, 41–46.
133. His, E. Observations Préliminaires Sur La Présence de *Mytilicola orientalis* Mori (1955) Chez *Crassostrea gigas* Thunberg Dans Le Bassin d’Arcachon. *Bull. Société Géologique Amis Mus. Havre* **1977**, 64, 7–8.
134. Holthuis, L.B. *Necora*, a New Genus of European Swimming Crabs (Crustacea Decapoda, Portunidae) and Its Type Species, *Cancer puber* L., 1767. *Zool. Meded.* **1987**, 61, 1–14.
135. Massé, C.; Chouquet, B.; Dubut, S.; Durand, F.; Gouillieux, B.; Dancie, C. Premier Signalement de l’espèce Non Indigène *Neomysis americana* (Crustacé : Mysidacé) Dans l’estuaire de La Seine (Normandie, France). *Aod - Cah. Nat. Obs. Mar.* **2018**, 6, 7–16.
136. Băcescu, M. Les Mysidacés Des Eaux Méditerranéennes de La France (Spécialement de Banyuls) et Des Eaux de Monaco. *Bull. Inst. Océan.* **1941**, 795, 1–46.
137. Noël, P.Y. Checklist of Cryptogenic and Alien Crustacea of the European Atlantic Coast. In *In the wrong place - Alien marine crustaceans: distribution, biology and impacts*; Galil, B.S., Clark, P.F., Carlton, J.T., Eds.; Invading Nature - Springer Series in Invasion Ecology; Springer Netherlands: Dordrecht, 2011; pp. 345–375 ISBN 978-94-007-0591-3.
138. Beguer, M. First Record of the Invasive Oriental Shrimp *Palaemon macrodactylus* Rathbun, 1902 in France (Gironde Estuary). *Aquat. Invasions* **2007**, 2, 132–136, doi:10.3391/ai.2007.2.2.8.
139. Marchini, A.; Ferrario, J.; Minchin, D. Marinas May Act as Hubs for the Spread of the Pseudo-Indigenous Bryozoan *Amathia verticillata* (Delle Chiaje, 1822) and Its Associates. *Sci. Mar.* **2015**, 79, 1–11, doi:10.3989/scimar.04238.03a.
140. Lavesque, N.; Sorbe, J.-C.; Bachelet, G.; Gouillieux, B.; de Montaudouin, X.; Bonifacio, P.; Blanchet, H.; Dubois, S. Recent Discovery of *Paranthura japonica* Richardson, 1909 (Crustacea: Isopoda: Paranthuridae) in European Marine Waters (Arcachon Bay, Bay of Biscay). *BiolInvasions Rec.* **2013**, 2, 215–219, doi:10.3391/bir.2013.2.3.07.
141. Galil, B.S.; Innocenti, G.; Douek, J.; Paz, G.; Rinkevich, B. Foul Play? On the Rapid Spread of the Brown Shrimp *Penaeus aztecus* Ives, 1891 (Crustacea, Decapoda, Penaeidae) in the Mediterranean, with New Records from the Gulf of Lion and the Southern Levant. *Mar. Biodivers.* **2017**, 47, 979–985, doi:10.1007/s12526-016-0518-x.
142. Tournier, H. Conditions d’acclimatation Des Crevettes *Penaeus kerathurus* et *P. japonicus* Dans Les Eaux Du Littoral Languedocien. *Bull. Inst. Pêch. Marit.* **1972**, 213, 1–13.
143. Pezy, J.-P.; Baffreau, A.; Dauvin, J.-C. Records of Two Introduced Penaeidae (Crustacea: Decapoda) Species from Le Havre Harbour, France, English Channel. *BiolInvasions Rec.* **2017**, 6, 363–367, doi:10.3391/bir.2017.6.4.10.
144. Noël, P.Y. *Le Crabe Plat Des Oursins* *Percnon gibbesi* (Milne-Edwards H., 1853); MNHN, 2015; p. 10;.
145. Brylinski, J.-M.; Antajan, E.; Raud, T.; Vincent, D. First Record of the Asian Copepod *Pseudodiaptomus marinus* Sato, 1913 (Copepoda: Calanoida: Pseudodiaptomidae) in the Southern Bight of the North Sea along the Coast of France. *Aquat. Invasions* **2012**, 7, 577–584, doi:10.3391/ai.2012.7.4.014.
146. Delpy, F.; Pagano, M.; Blanchot, J.; Carlotti, F.; Thibault-Botha, D. Man-Induced Hydrological Changes, Metazooplankton Communities and Invasive Species in the Berre Lagoon (Mediterranean Sea, France). *Mar. Pollut. Bull.* **2012**, 64, 1921–1932, doi:10.1016/j.marpolbul.2012.06.020.
147. Korringa, P.; Lambert, L. Quelques Observations Sur La Fréquence de *Mytilicola intestinalis* (Copepoda Parasita) Dans Les Moules Du Littoral Méditerranéen Français Avec Une Note Sur La Présence de *Pseudomyicola spinosus* (Raff et Mont.) (Copepoda Parasita). *Rev. Trav. Inst. Sci. Tech. Pêch. Marit.* **1951**, 17, 15–29.

148. Lo Brutto, S.; Iaciovano, D. A Taxonomic Revision Helps to Clarify Differences between the Atlantic Invasive *Ptilohyale littoralis* and the Mediterranean Endemic *Parhyale plumicornis* (Crustacea, Amphipoda). *ZooKeys* **2018**, *754*, 47–62, doi:10.3897/zookeys.754.22884.
149. Saudray, Y. Présence de *Heteropanope tridentatus* Maitl. Crustacé Décapode Brachyoure Dans Le Réseau Hydrographique Normand. *Bull. Société Zool. Fr.* **1956**, *81*, 33–34.
150. Mascart, T.; Lepoint, G.; Deschoemaeker, S.; Binard, M.; Remy, F.; De Troch, M. Seasonal Variability of Meiofauna, Especially Harpacticoid Copepods, in *Posidonia oceanica* Macrophytodebris Accumulations. *J. Sea Res.* **2015**, *95*, 149–160, doi:10.1016/j.seares.2014.07.009.
151. Gruet, Y.; Vimpère, J.; Sauriau, P.-G.; Le Roux, A. La Balane *Hesperibalanus fallax* (Broch, 1927) (Crustacé Cirripède) Sur La Côte Française Atlantique Du Golfe de Gascogne et Sa Présence En Baie de Seine (Manche Orientale) Dès 1976. *Bull. Société Sci. Nat. Ouest Fr. Nouv. Sér.* **2014**, *36*, 244–256.
152. Zibrowius, H. Ongoing Modification of the Mediterranean Fauna and Flora by the Establishment of Exotic Species. *Mésogée* **1991**, *51*, 83–107.
153. Ulman, A.; Ferrario, J.; Occhipinti-Ambrogi, A.; Arvanitidis, C.; Bandi, A.; Bertolino, M.; Bogi, C.; Chatzigeorgiou, G.; Çiçek, B.A.; Deidun, A.; et al. A Massive Update of Non-Indigenous Species Records in Mediterranean Marinas. *PeerJ* **2017**, *5*, e3954, doi:10.7717/peerj.3954.
154. Brylinski, J.-M.; Courcot, L. Report of Two Mediterranean Species of *Stephos* T. Scott, 1892 (Copepoda: Calanoida) in the North-East Atlantic Ocean (Brittany, France), with a Note on the “Hyaline Sheath” in the Genus *Stephos*. *BiolInvasions Rec.* **2019**, *8*, 357–368, doi:10.3391/bir.2019.8.2.17.
155. Mees, J.; Fockede, N. First Record of *Synidotea laevidorsalis* (Miers, 1881) (Crustacea: Isopoda) in Europe (Gironde Estuary, France). *Hydrobiologia* **1993**, *264*, 61–63, doi:10.1007/BF00014665.
156. Joliet, L. Bryozoaires Nouveaux de Roscoff et Bryozoaires de Menton. *Arch. Zool. Expérimentale Générale* **1888**, *2*, 103–109.
157. Calvet, L. Contribution à l'histoire Naturelle Des Bryozoaires Ectoproctes Marins. *Trav. Inst. Zool. Univ. Montp. Stn. Zool. Cette* **1900**, *8*, 488.
158. Prenant, M.; Bobin, G. *Bryozoaires. Deuxième Partie : Chilostomes Anasca*; Faune de France; Fédération Française des Sociétés de Sciences Naturelles. Office Central de Faunistique: Paris, 1966; Vol. 68;.
159. D'Hondt, J.-L.; Cazaux, C. Présence de *Bugula simplex* (Hincks, 1886) (Bryozoaires, Cheilostomes) Dans Le Bassin d'Arcachon. *Bull. Société Linn. Bordx.* **1994**, *22*, 141–143.
160. D'Hondt, J.-L.; Breton, G. Une Nouvelle Introduction Dans Le Bassin d'Arcachon : Le Bryzoaire Cheilostome Intertropical *Caulibugula zanzibarensis* Waters, 1913. *Bull. Trimest. Société Géologique Normandie Amis Muséum Havre* **2005**, *92*, 19–21.
161. André, F.; Corolla, J.-P.; Lanza, B.; Rochefort, G. *Bryozoaires d'Europe : Les Carnets Du Plongeur*; Éditions Neptune Plongée; Gargas, 2014;
162. Calvet, L. Bryozoaires Marins de La Région de Cette. *Trav. Inst. Zool. Univ. Montp. Stn. Zool. Cette* **1902**, *11*, 1–103.
163. De Blauwe, H. *Fenestulina delicia* Winston, Hayward & Craig 2000, Een Nieuw Mosdiertje (Cheilostomata, Bryozoa) in Europa. *Strandvlo* **2008**, *28*, 154–157.
164. De Blauwe, H. On the Taxonomy and Distribution of the Family Pacificincolidae Liu & Liu, 1999 (Bryozoa, Cheilostomata), with the Description of a New Genus. *Bull. Inst. R. Sci. Nat. Belg.* **2006**, *76*, 139–145.
165. De Blauwe, H.; Faasse, M. Extension of the Range of the Bryozoans *Tricellaria inopinata* and *Bugula simplex* in the North-East Atlantic Ocean (Bryozoa: Cheilostomatida). *Ned. Faun. Meded.* **2001**, 103–112.
166. Poisson, R.; Rémy, P. Contribution à l'étude de La Faune Des Eaux Saumâtres. *Bull. Société Linn. Normandie* **1925**, *7*, 144–155.
167. Reverter-Gil, O.; Souto, J. Watersiporidae (Bryozoa) in Iberian Waters: An Update on Alien and Native Species. *Mar. Biodivers.* **2019**, *49*, 2735–2752, doi:10.1007/s12526-019-01003-4.
168. D'Hondt, J.-L. Un Nouvel Immigrant Dans Le Bassin d'Arcachon, *Watersipora aterrima* (Ortmann, 1890) (Bryozoaire Cheilostome).; 1984; Vol. 2, pp. 237–245.
169. Ruellet, T.; Breton, G. *V.I.P. : Vie Introduite Dans Les Ports*; GIP Seine Aval 4, 2012; p. 417;.
170. Bishop, J.D.D.; Roby, C.; Yunnice, A.L.E.; Wood, C.A.; Lévêque, L.; Turon, X.; Viard, F. The Southern Hemisphere Ascidian *Asterocarpa humilis* Is Unrecognised but Widely Established in NW France and Great Britain. *Biol. Invasions* **2013**, *15*, 253–260, doi:10.1007/s10530-012-0286-x.

171. Wheeler, A. A New Record of the Fish *Beryx splendens* Lowe in Northern European Waters. *Ann. Mag. Nat. Hist.* **1963**, *6*, 193–197, doi:10.1080/00222936308651342.
172. Bishop, J.D.D.; Wood, C.A.; Lévêque, L.; Yunnies, A.L.E.; Viard, F. Repeated Rapid Assessment Surveys Reveal Contrasting Trends in Occupancy of Marinas by Non-Indigenous Species on Opposite Sides of the Western English Channel. *Mar. Pollut. Bull.* **2015**, *95*, 699–706, doi:10.1016/j.marpolbul.2014.11.043.
173. Nydam, M.L.; Harrison, R.G. Introgression despite Substantial Divergence in a Broadcast Spawning Marine Invertebrate. *Evol. Int. J. Org. Evol.* **2011**, *65*, 429–442, doi:10.1111/j.1558-5646.2010.01153.x.
174. Monniot, C.; Giannesini, P.J.; Oudot, J.; Richard, M. Ascidiées: “Salissures” Marines et Indicateurs Biologiques (Métaux, Hydrocarbures). *Bull. Muséum Natl. Hist. Nat. Paris 4e Sér. Sect. Zool. Biol. Écologie Anim.* **1986**, *8*, 215–245.
175. Lambert, G. The South Temperate and Antarctic Ascidian *Corella eumyota* Reported in Two Harbours in North-Western France. *J. Mar. Biol. Assoc. U. K.* **2004**, *84*, 239–241, doi:10.1017/S0025315404009105h.
176. Harant, H. La Faune Ascidiologique de Banyuls et de Cette : Essai de Révision Des Ascidiées de La Méditerranée Occidentale. *Ann. Inst. Océan. Monaco* **1927**, *4*, 209–251.
177. Quignard, J.P. Biodiversité: La Méditerranée, Évolution de Sa Xénodiversité Ichtyique, Les Poissons Lessepsiens et Herculéens. *Bull. Académie Sci. Lett. Montp. Nouv. Sér.* **2011**, *42*, 105–124.
178. Turon, X.; Casso, M.; Pascual, M.; Viard, F. Looks Can Be Deceiving: *Didemnum pseudovexillum* Sp. Nov. (Ascidiacea) in European Harbours. *Mar. Biodivers.* **2020**, *50*, doi:10.1007/s12526-020-01083-7.
179. Lafargue, F. Les Peuplements Sessiles de l’Archipel de Glénan. II. Les Didemnidae — Systématique — Écologie. *Vie Milieu* **1968**, *19*, 353–446.
180. Monniot, C.; Monniot, F. Discussion Sur La Valeur de Deux Genres d’ascidiées à Propos d’espèces Nouvelles En Méditerranée. *Ann. Inst. Océan. Monaco* **1987**, *63*, 119–130.
181. Lelong, P. Capture d’un Macabité, *Epinephelus merra* Bloch, 1793 (Poisson, Serranidae), En Méditerranée Nord-Occidentale. *Mar. Life* **2005**, *15*, 63–66.
182. Bodilis, P.; Arceo, H.; Francour, P. Further Evidence of the Establishment of *Fistularia commersonii* (Osteichthyes: Fistulariidae) in the North-Western Mediterranean Sea. *Mar. Biodivers. Rec.* **2011**, *4*, e18, doi:10.1017/S1755267211000194.
183. Iglesias, S.P.; Bergoat, P.; Breton, P.; Brunelle, S.; Camusat, M.; Causse, R.; Charbonnel, E.; Chevaldonné, P.; Cordier, Y.; Cosquer, P.; et al. French Ichthyological Records for 2018. *Cybiu Rev. Int. Ichthyologie* **2020**, *44*, 285–307, doi:10.26028/CYBIUM/2020-444-001.
184. Iglesias, S.P.; Bariche, M.; Beau, F.; Berenger, L.; Beucher, R.; Chabrolle, A.; Cottalorda, J.-M.; Cousin, B.; Curd, A.; Danet, V.; et al. French Ichthyological Records for 2019. *Cybiu Rev. Int. Ichthyologie* **2021**, *45*, 169–188, doi:10.26028/cybiu/2021-453-001.
185. Monniot, F. *Microcosmus anchylodeirus* (Ascidiacea, Pyuridae) Introduced in the Mediterranean Sea. *Zootaxa* **2016**, *4175*, 222–230, doi:10.11646/zootaxa.4175.3.2.
186. Monniot, C. Apparition de l’ascidie *Microcosmus exasperatus* Dans Les Ports Méditerranéens. *Tethys* **1981**, *10*, 59–61.
187. Breton, G. Espèces introduites ou invasives des ports du Havre, d’Antifer et de Rouen (Normandie, France). *Hydroécologie Appliquée* **2014**, *18*, 23–65, doi:10.1051/hydro/2014003.
188. Le Mao, P. *Inventaire de la faune marine du golfe normano-breton*; IFREMER, 2009; p. 106;.
189. Pergent-Martini, C.; Provost, C. *Rapport d’activité 2021–2022 Réseau Alien Corse*; Convention Université de Corse Pascal Paoli & OEC, Avenant N°5 à la Convention 16/02 UCPP & OEC, Corte, 2022; p. 26;.
190. Monniot, C.; Monniot, F. Apparition de l’ascidie *Perophora japonica* Sur Les Côtes et Dans Les Ports de La Manche. *C. r. Séances Société Biogéographie* **1985**, *61*, 111–116.
191. Monniot, C. Ascidiées Littorales de Guadeloupe. II. Phlebobranches. *Bull. Muséum Natl. Hist. Nat. Paris* **1983**, *5*, 51–71.
192. Lozach, S.; Dauvin, J.-C. Temporal Stability of a Coarse Sediment Community in the Central Eastern English Channel Paleovalleys. *J. Sea Res.* **2012**, *71*, 14–24, doi:10.1016/j.seares.2012.03.007.

193. Quignard, J.-P.; Tomasini, J.A. Mediterranean Fish Biodiversity. *Biol. Mar. Mediterr.* **2000**, *7*, 1–66.
194. Daniel, B.; Piro, S.; Francour, P. Lessepsian Rabbitfish *Siganus luridus* Reached the French Mediterranean Coasts. *Cybum Rev. Int. Ichtyologie* **2009**, *33*, 163–164.
195. ICES Working Group on Introductions and Transfers of Marine Organisms (WGITMO); ICES Scientific Reports, 2011; Vol. 4;.
196. Otero, M.; Cebrian, E.; Francour, P.; Galil, B.S.; Savini, D. *Monitoring Marine Invasive Species in Mediterranean Marine Protected Areas (MPAs). A Strategy and Practical Guide for Managers*; IUCN, 2013; p. 136;.
197. Quéro, J.-C.; Du Buit, M.-H.; Fonteneau, J.; Kergoat, B.; Vayne, J.-J. Premières Observations Dans Les Ports Français de *Sphoeroides pachygaster* (Pisces, Tetraodontiformes, Tetraodontidae) Capturés Au Nord de Leur Aire de Répartition Connue. *Ann. Société Sci. Nat. Charente-Marit.* **1991**, *7*, 1058–1063.
198. Monniot, C. Sur Quatre Ascidies Rares Ou Mal Connues Des Côtes de La Manche. *Cah. Biol. Mar.* **1970**, *11*, 145–152, doi:10.21411/CBM.A.99E84343.
199. Lafargue, F. Didemnidae de Port-Cros (Ascidies Composées). Deux Espèces Nouvelles Pour Les Côtes de France. *Ann. Société Sci. Nat. Toulon-Var* **1972**, *24*, 120–140.
200. Gili, J.M.; Bouillon, J.; Pages, F.; Palanques, A.; Puig, P.; Heussner, S. Origin and Biogeography of the Deep-Water Mediterranean Hydromedusae Including the Description of Two New Species Collected in Submarine Canyons of Northwestern Mediterranean. *Sci. Mar.* **1998**, *62*, 113–134, doi:10.3989/scimar.1998.62n1-2113.
201. Schroth, W.; Jarms, G.; Streit, B.; Schierwater, B. Speciation and Phylogeography in the Cosmopolitan Marine Moon Jelly, *Aurelia* Sp. *BMC Evol. Biol.* **2002**, *2*, 1, doi:10.1186/1471-2148-2-1.
202. Scorrano, S.; Aglieri, G.; Boero, F.; Dawson, M.N.; Piraino, S. Unmasking *Aurelia* Species in the Mediterranean Sea: An Integrative Morphometric and Molecular Approach. *Zool. J. Linn. Soc.* **2016**, doi:10.1111/zoj.12494.
203. Denayer, J.-C. Trois Méduses Nouvelles Ou Peu Connues Des Côtes Françaises : *Maeotias inexpectata* Ostroumov, 1896, *Blackfordia virginica* Mayer, 1910, *Nemopsis bachei* Agassiz, 1849. *Cah. Biol. Mar.* **1973**, *14*, 285–294, doi:10.21411/CBM.A.B92D0221.
204. Goy, J. Les Hydroméduses de La Mer Ligure. *Bull. Muséum Natl. Hist. Nat.* **1972**, *62*, 965–1009.
205. Picard, J. Note Sur Les Hydraires Littoraux de Banyuls-Sur-Mer. *Vie Milieu* **1951**, *2*, 338–349.
206. Ferronière, G. Études Biologiques Sur Les Zones Supralittorales de La Loire-Inférieure. *Bull. Société Sci. Nat. Ouest Fr.* **1901**, *2*, 1–451.
207. Stephenson, E.M. On the Anatomy and Relationships of New or Little Known British Actiniaria. *J. Mar. Biol. Assoc. U. K.* **1925**, *13*, 891–909.
208. Carre, D.; Carré, C. Complex Reproductive-Cycle in *Eucheilota paradoxica* (Hydrozoa, Leptomedusae) - Medusae, Polyps and Frustules Produced from Medusa Stage. *Mar. Biol.* **1990**, *104*, 303–310.
209. Schuchert, P. The European Athecate Hydroids and Their Medusae (Hydrozoa, Cnidaria): Filifera Part 3. *Rev. Suisse Zool.* **2008**, *115*, 221–302, doi:10.5962/bhl.part.80426.
210. Teissier, G. Existence de *Gonionemus murabachi* Sur Les Côtes de Bretagne. *Trav. Stn. Biol. Roscoff* **1932**, *10*, 115–116.
211. Brylinski, J.-M.; Li, L.-L.; Vansteenbrugge, L.; Antajan, E.; Hoffman, S.; Ginderdeuren, K.; Vincent, D. Did the Indo-Pacific Leptomedusa *Lovenella assimilis* (Browne, 1905) or *Eucheilota menoni* Kramp, 1959 Invade Northern European Marine Waters? Morphological and Genetic Approaches. *Aquat. Invasions* **2016**, *11*, 21–32, doi:10.3391/ai.2016.11.1.03.
212. Tiffon, Y. Présence de *Nemopsis bachei* (Agassiz) Dans Les Eaux Saumâtres de La Gironde (Anthoméduse). Recherches Sur La Faune de l'estuaire de La Gironde, II. *Vie Milieu* **1956**, *7*, 550–553.
213. Zibrowius, H. *Oculina patagonica*, sclérectiniaire hermatypique introduit en Méditerranée. *Helgoländer Wiss. Meeresunters.* **1974**, *26*, 153–173, doi:10.1007/BF01611381.
214. Hoeksema, B.W.; Vicente, O.O. First Record of the Central Indo-Pacific Reef Coral *Oulastrea crispata* in the Mediterranean Sea. *Mediterr. Mar. Sci.* **2014**, *15*, 429–436, doi:10.12681/mms.751.
215. Antajan, E. The Invasive Ctenophore *Mnemiopsis leidyi* A. Agassiz, 1865 along the English Channel and the North Sea French Coasts: Another Introduction Pathway in Northern European Waters? *Aquat. Invasions* **2014**, *9*, 167–173, doi:10.3391/ai.2014.9.2.05.

216. Karachle, P.K.; Angelidis, A.; Apostolopoulos, G.; Ayas, D.; Ballesteros, M.; Bonnici, C.; Brodersen, M.M.; Castriota, L.; Chalari, N.; Cottalorda, J.M.; et al. New Mediterranean Biodiversity Records (March 2016). *Mediterr. Mar. Sci.* **2016**, *17*, 230–252, doi:10.12681/mms.1684.
217. Hoenselaar, H.J.; Hoenselaar, J. *Musculista senhousia* (Benson in Cantor, 1842) in the Western Mediterranean (Bivalvia, Mytilidae). *Basteria* **1989**, *53*, 73–76.
218. Vicente, N. *100 & une limaces de mer: guide d'identification des Mollusques Opisthobranches d'Atlantique et de Méditerranée*; Éd. GAP: Challes-les-Eaux, 2008; ISBN 978-2-7417-0353-2.
219. Bouchet, P.; Tardy, J. Faunistique et Biogéographie Des Nudibranches Des Côtes Françaises de l'Atlantique et de La Manche. *Ann. Inst. Océan. Paris* **1976**, 205–213.
220. Maurin, C.; Gras, P. Experiments on the Growth of the Mangrove Oyster, *Crassostrea rhizophorae*, in France. In *Exotic Species in Mariculture*; The MIT Press, Cambridge, Mass; 1979; pp. 123–128.
221. Fischer, P. Acclimatation, En France, de Mollusques Exotiques. *J. Conchyliol.* **1865**, *13*, 65–66.
222. Canu Question Du Crepidula. *Ostréiculteur Fr.* **1934**, *11*, 5.
223. Luczak, C.; Dewarumez, J.-M.; Essink, K. First Record of the American Jack Knife Clam *Ensis directus* on the French Coast of the North Sea. *J. Mar. Biol. Assoc. U. K.* **1993**, *73*, 233–235, doi:10.1017/S0025315400032768.
224. Hanson, D.; Hirano, Y.; Valdés, Á. Population Genetics of *Haminoea (Haloa) japonica* Pilsbry, 1895, a Widespread Non-Indigenous Sea Slug (Mollusca: Opisthobranchia) in North America and Europe. *Biol. Invasions* **2013**, *15*, 395–406, doi:10.1007/s10530-012-0294-x.
225. Merle, D.; Filippozzi, D. First Record of *Trunculariopsis trunculus* (Linnaeus, 1758) (Mollusca: Gastropoda) from the Basin of Arcachon (Gironde): The Second Exotic Muricid on the French Atlantic Coast. *Cah. Biol. Mar.* **2005**, *46*, 299–303, doi:10.21411/CBM.A.386A6650.
226. Lafont, A. Note Pour Servir à La Faune de La Gironde Contenant La Liste Des Animaux Marins Dont La Présence à Arcachon a Été Constatée Pendant Les Années 1867 et 1868. *Actes Société Linn. Bordx.* **1968**, *26*, 518–531.
227. Fischer, P. Faune Conchyliologique Marine Du Département de La Gironde et Des Côtes Du Sud-Ouest de La France. 2e Supplément. *Actes Société Linn. Bordx.* **1873**, *29*, 193–255.
228. Trochon, P. *Rapport Sur l'activité Du Laboratoire de La Tremblade - Année 1957*; Ifremer, 1957;
229. Cochenne, N.; Renault, T.; Boudry, P.; Chollet, B.; Gerard, A. *Bonamia*-like Parasite Found in the Suminoe Oyster *Crassostrea rivularis* Reared in France. *Dis. Aquat. Organ.* **1998**, *34*, 193–197, doi:10.3354/dao034193.
230. Boudry, P.; Gerard, A.; Naciri, Y.; Launey, S.; Ledu, C.; Phelipot, P.; Heurtebise, S. *Acclimatation de Nouvelles Espèces d'huîtres Creuses Du Genre Crassostrea : Hybridation et Conservatoire de Souches. Contrat Région Poitou-Charentes 1994–1998 - 1ère Partie : Rapport Année 1994*; 1994;
231. Cochard, J.C.; Comps, M.; Buestel, D.; Paquotte, P. Introduction of the Japanese Scallop *Patinopecten yessoensis* (Jay) into France and the Hatchery Production of the F1 Generation. In *Scallop Biology and Culture*; World Aquaculture Society: Louisiana, 1991; pp. 281–286.
232. Stora, G. Évolution Des Peuplements Benthiques d'un Étang Marin Soumis à Un Effluent d'eaux Douces. *Bull. Ecol.* **1976**, *7*, 275–281.
233. Sauriau, P.-G.; Pigeot, J. Contribution à l'inventaire de La Macrofaune Marine En Baie de Marennes-Oléron. *Ann. Société Sci. Nat. Charente-Marit.* **2010**, *10*, 23–44.
234. Bougrier, S.; Tige, G.; Bachere, E.; Grizel, H. *Ostrea angasi* Acclimatization to French Coasts. *Aquac. Amst. Neth.* **1986**, *58*, 151–154, doi:10.1016/0044-8486(86)90165-1.
235. Grizel, H.; Comps, M.; Raguene, D.; Leborgne, Y.; Tige, G.; Martin, A.G. Bilan des essais d'acclimatation d'*Ostrea chilensis* sur les côtes de Bretagne. *Rev. Trav. Inst. Pêch. Marit.* **1982**, *46*, 209–225.
236. Pascual, M.; Martin, A.-G.; Zampatti, E.; Coatanea, D.; Defosse, J.; Robert, R. *Testing of the Argentina Oyster Ostrea puelchana, in Several French Oyster Farming Sites*; ICES Mariculture Committee, 1991; p. 17;.
237. Zibrowius, H. Serpulidae (Annelida Polychaeta) de l'Océan Indien Arrivés Sur Des Coques de Bateaux à Toulon (France, Méditerranée). *Rapp Comm Int Mer Médit* **1979**, *25/26*, 2.

238. Boettger, C.R. Die Herkunft Und Verwandtschaftsbeziehungen Der Wasserschnecke *Potamopyrgus jenkinsi* E. A. Smith, Nebst Einer Angabe Über Ihr Auftreten Im Mediterrangebiet. *Arch. Für Molluskenkd.* **1951**, *80*, 57–85.
239. Nolf, F. Confirmation of the Presence of *Fusinus rostratus* (Olivi, 1792) as a New Invader in Northern Waters of Brittany (France) *Pusionella albocincta* (Petit de La Saussaye, 1851): A Form of *P. nifat* (Bruguère, 1792) (Mollusca: Gastropoda: Turridae). *Neptunea* **2009**, *8*, 9–16.
240. Faillettaz, R.; Roger, C.; Mathieu, M.; Robin, J.P.; Costil, K. Establishment and Population Features of the Non-Native Atlantic Rangia, *Rangia cuneata* (Mollusca: Bivalvia), in Northwestern France. *Aquat. Invasions* **2020**, *15*, 367–381, doi:10.3391/ai.2020.15.3.02.
241. Camus, P. Un Bien Discret et Redoutable Prédateur de Coquillages, l'exotique Globe-Trotter : *Rapana venosa*. *La Vigie* **2001**, *26*, 3–9.
242. Flassch, J.-P. Culture de Palourdes Sur Sable En Étang Marin Menée à l'Île Tudy. Résultats et Perspectives. *Bull. CNEXO* **1978**, *119*, 7–8.
243. Deleamarre, J.-L.; Le Neuthiec, R. Faune Régionale : Espèce Introduite : Présence de *Gibbula albida* Dans Le Golfe Du Morbihan (Morbihan) et Dans La Région de Paimpol (Côtes d'Armor). *Bull. Société Sci. Nat. Ouest Fr.* **1995**, *17*, 54–61.
244. Bachelet, G.; Cazaux, C.; Gantès, H.; Labourg, P.-J. Contribution à l'étude de La Faune Marine de La Région d'Arcachon. *Bull. Cent. D'Études Rech. Sci. Biarritz* **1980**, *13*, 45–64.
245. Le Dantec, J. Les Bigorneaux Perceurs. *Bull. Inst. Sci. Tech. Pêch. Marit.* **1960**, *80*, 1–3.
246. Zenetos, A.; Gofas, S.; Russo, G.; Templado, J. *CIESM Atlas of Exotic Species in the Mediterranean. Molluscs. Volume 3*; Briand, F., Ed.; CIESM Publishers.; CIESM Publishers: Monaco, 2004; Vol. 3;.
247. Dauvin, J.-C.; Gofas, S.; Raoux, A.; Bouchet, V.; Pavard, J.-C.; Pezy, J.-P. The American Protobranch Bivalve *Yoldia limatula* (Say, 1831) in European Waters. *BioInvasions Rec.* **2022**, *11*, 473–481, doi:10.3391/bir.2022.11.2.20.
248. Fontaine, Y.A.; Le Belle, N.; Lopez, E.; Querat, B.; Vidal, B.; Barthélémy, L.; Sebert, P.; Alinat, J.; Petter, A.J. Infestation de populations françaises d'anguilles (*Anguilla anguilla* L.) par des Nématodes *Anguillicola crassus* : essais thérapeutiques évaluation de risques potentiels liés à l'écophysiologie de l'hôte. *Ann. Parasitol. Hum. Comparée* **1990**, *65*, 64–68, doi:10.1051/parasite/1990652064.
249. Maurin, C.; Le Dantec, J. The Culture of *Crassostrea gigas* in France. In *Exotic species in mariculture*; The MIT Press: Cambridge, Massachusetts, 1979; pp. 106–123.
250. Lambert, A.; Le Brun, N.; Pariselle, A. Présence En France de *Pseudodactylogyrus anguillae* (Yin et Sproston, 1948) Gussev, 1965 (Monogenea, Monopisthocotylea) Parasite Branchial de l'anguille Européenne *Anguilla anguilla* En Eau Douce. *Ann. Parasitol. Hum. Comparée* **1984**, *60*, 91–92.
251. Perez, T.; Perrin, B.; Carteron, S.; Vacelet, J.; Boury-Esnault, N. *Celtodoryx girardae* Gen. Nov. Sp. Nov., a New Sponge Species (Poecilosclerida: Demospongiae) Invading the Gulf of Morbihan (North East Atlantic, France). *Cah. Biol. Mar.* **2006**, *47*, 205–214, doi:10.21411/CBM.A.1E48CEBD.
